# Supplementary material for: Transition metal-free electrochemical fluorotrifluoromethylation of Styrenes
Source: Royal Society of Chemistry journal article supplement (doi:10.1039/d2qo01947g), 2023-01-01

## Electronic Supplementary Information

### Transition Metal-free Electrochemical Fluorotrifluoromethylation of Styrenes

Yi Lu<sup>a</sup>, Zhirui Liu<sup>a</sup>, Chao Liu<sup>a</sup>, Yunpeng Wu<sup>a</sup>, Lu Li<sup>a</sup>, Siyuan Liu<sup>\*a</sup>, Hong Wang<sup>a</sup>, Wei Gao<sup>a</sup>,  
Zhenxian Liu<sup>b</sup>, and Jianbin Chen<sup>\*a,b</sup>

<sup>a</sup>Shandong Provincial Key Laboratory of Molecular Engineering, State Key Laboratory of Biobased Material and Green Papermaking, School of Chemistry and Chemical Engineering, Qilu University of Technology (Shandong Academy of Sciences), Jinan 250353, People's Republic of China.

<sup>b</sup>Intellectual Property Operations Management Office, Qilu University of Technology (Shandong Academy of Sciences), Jinan 250353, People's Republic of China.

## Table of contents

|                                                                        |     |
|------------------------------------------------------------------------|-----|
| <b>1. General Information</b> .....                                    | S3  |
| <b>2. Experimental Procedures</b> .....                                | S4  |
| 2.1 Treatment of electrode materials .....                             | S4  |
| 2.2 The procedure for electrosynthesis in a two-electrode system ..... | S4  |
| 2.3 Experiments with GC-MS analysis.....                               | S5  |
| 2.4 Complementary CV.....                                              | S9  |
| 2.5 The results of radical trapping experiments.....                   | S10 |
| <b>3. Characterization of Products</b> .....                           | S11 |
| <b>4. References</b> .....                                             | S19 |
| <b>5. NMR Spectra of Products</b> .....                                | S20 |

## 1. General Information

All reagents were purchased without further purification unless otherwise noted. Analytical thin-layer chromatography (TLC) was conducted with TLC silica gel GF254 under UV irradiation. Flash column chromatography was performed using silica gel 200-300 and columns were packed according to the dry or wet method. Nuclear Magnetic Resonance spectra were recorded on a Bruker Advance II 400 (400 MHz) or Bruker Advance III 400 (400 MHz) NMR spectrometer and <sup>1</sup>H NMR reported in units of parts per million (ppm) relative to tetramethyl silane ( $\delta$  0 ppm) or CDCl<sub>3</sub> ( $\delta$  7.26 ppm). Multiplicities are given as: s (singlet), d (doublet), t (triplet), q (quartet), dt (doublets of triplet), td (triplet of doublets) or m (multiplet). <sup>13</sup>C NMR spectra were recorded on a Bruker Advance II 400 (101 MHz) or Bruker Advance III 400 (101 MHz) NMR spectrometer and reported in ppm relative to CDCl<sub>3</sub> (77.0 ppm). F NMR spectra were recorded on a Bruker Advance II 400 (376 MHz) or Bruker Advance III 400 (376 MHz) NMR. Coupling constants were reported as a *J* value in Hz. GC-MS data were recorded on SHIMADZU™ GCMS-QP2010. HR-MS analyses were performed on a Thermo Scientific Q Exactive Focus Orbitrap LC-MS/MS System. LSV determination was performed on CHI 760E (CH Instruments, Ins) with glassy carbon as working electrode, Ag/AgNO<sub>3</sub> as reference electrode and a Pt wire as counter electrode. The instrument for bulk electrolysis is dual display potentiostat (DJS-292B) (Shanghai xinrui instruments Co., Ltd). Distyryls (**1a**, **1d-1u**) were prepared according to the previous report<sup>[1]</sup>. The GC yields were determined by internal standard method: internal standard (mesitylene, 25  $\mu$ mol), pure products (25  $\mu$ mol), 1/160 of the volume of reaction solution (note: the products were 160  $\times$  25  $\mu$ mol, calculated as 100% yields).

## 2. Experimental Procedures

### 2.1 Treatment of electrode materials

Pretreatment of carbon rod: the specification of the carbon rod is a cylindrical rod with a diameter of 6 mm and were sonicated with ethyl acetate for 10 min to remove organic molecules on the surface, and then washed with ethanol several times to remove ethyl acetate; Pretreatment of Pt sheet, BDD sheet, carbon fiber paper (CP): cutting into pieces of 1.0 cm×1.0 cm and ultrasonicated with ethyl acetate for 10 minutes to remove organic molecules on the surface, then washed with ethanol several times to remove ethyl acetate; Pretreatment of Fe sheet, cutting into pieces of 1.5 cm×1.0 cm and sonicated with acetone, 3.0 M of HCl aqueous solution and deionized water several times respectively to remove the impurities (organic molecules and oxide layer) on the surface of the materials<sup>[2]</sup>.

### 2.2 The procedure for electrosynthesis in a two-electrode system

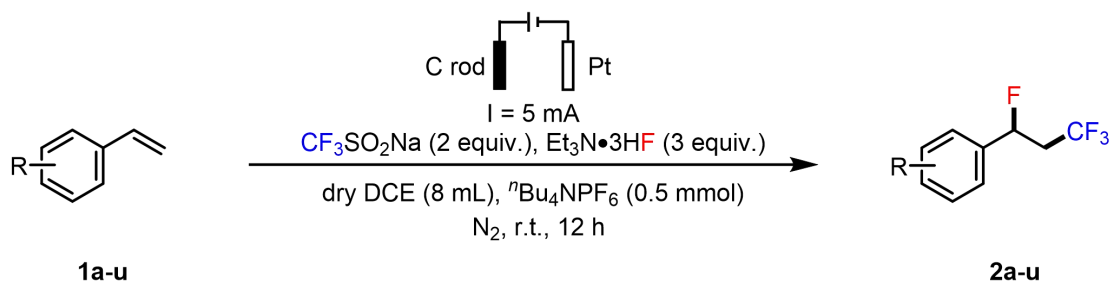

Into an undivided cell with a carbon rod anode (2.5 cm<sup>2</sup>) and a Pt sheet (1.0 cm<sup>2</sup>), dry DCE (8 mL),  ${}^t\text{Bu}_4\text{NBF}_6$  (193.7 mg, 0.5 mmol),  $\text{CF}_3\text{SO}_2\text{Na}$  (0.8 mmol),  $\text{Et}_3\text{N}\cdot 3\text{HF}$  (1.2 mmol) and freshly substrate **1** (0.4 mmol) were added. A constant current electrolysis with a current 5 mA was performed at room temperature. The electrochemical reaction under magnetic stirring (300 rpm) under nitrogen atmosphere. The reaction mixture was stirred and electrolyzed at a constant current of 5 mA at room temperature for 12 h. Then extract with ethyl acetate to obtain the organic phase. Then, the solvent was removed with a rotary evaporator. The pure products **2** were obtained by flash chromatography on silica gel by using petroleum ether and ethyl acetate (PE:EA = 50:1 to 20:1) as the eluent.



## 2.3 Experiments with GC-MS analysis

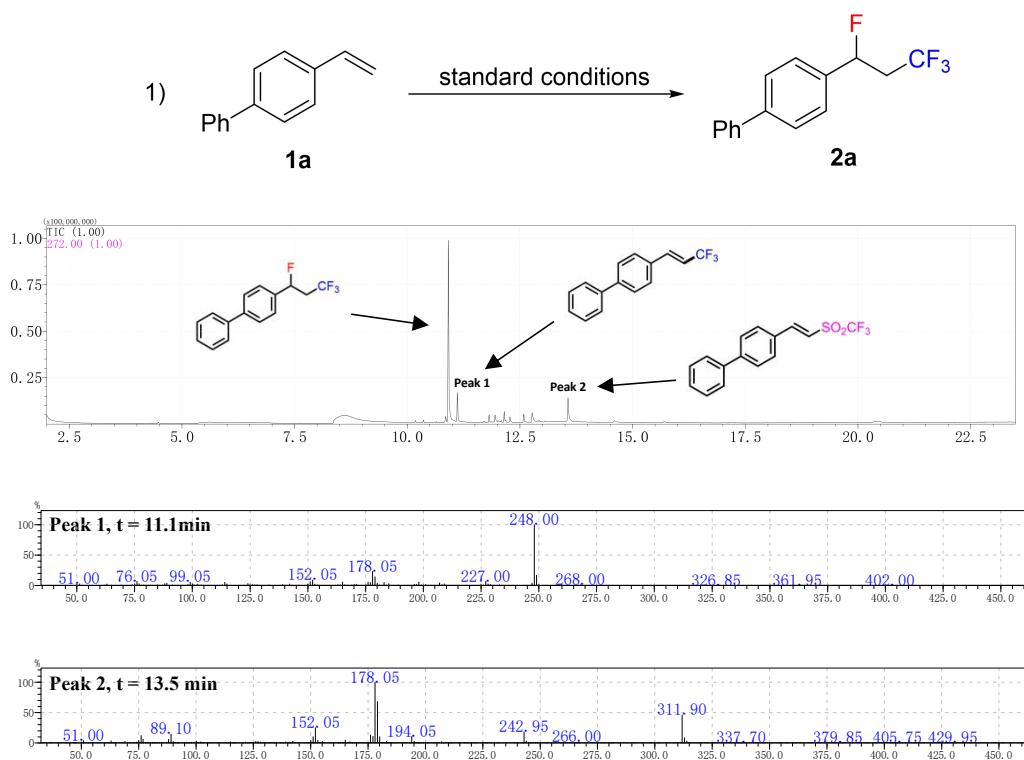

Figure S1. GC-MS analysis of the model reaction.

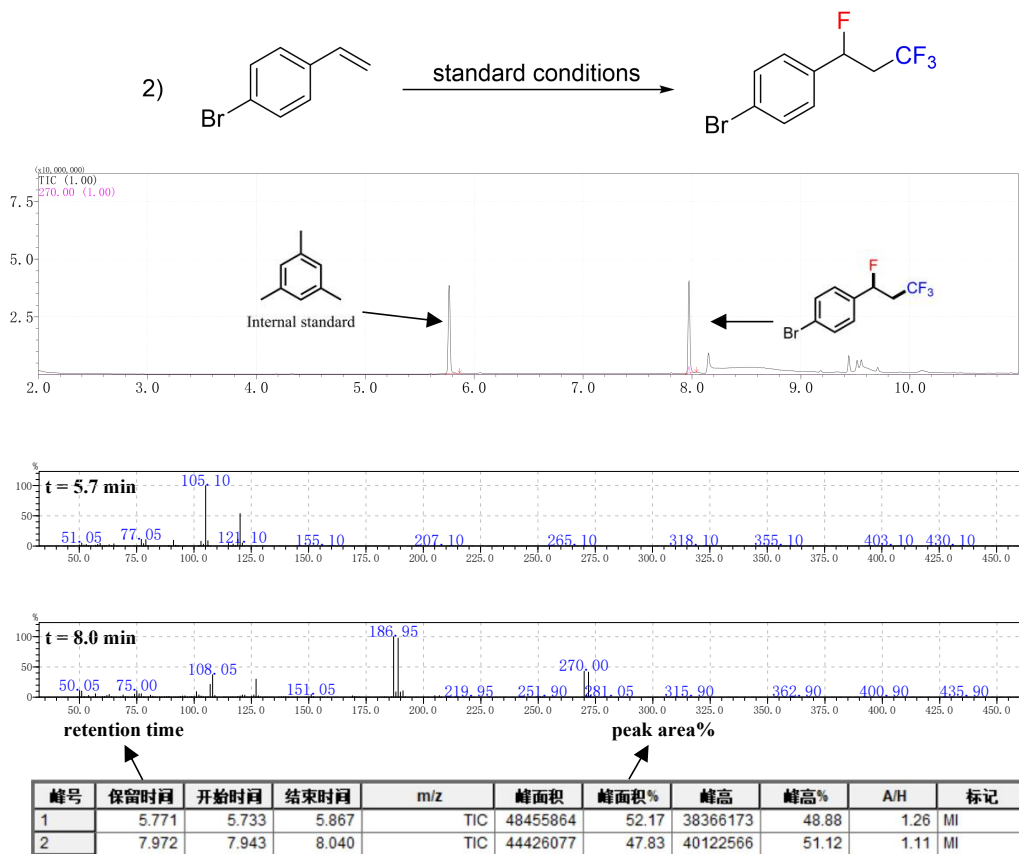

Figure S2. GC-MS analysis of the reaction from *p*-bromostyrene.

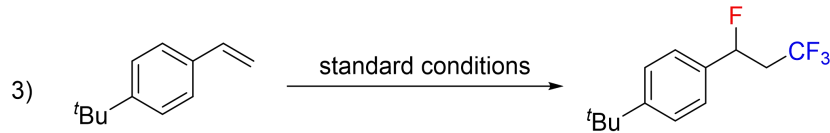

a) GC-MS of Internal standard and pure product

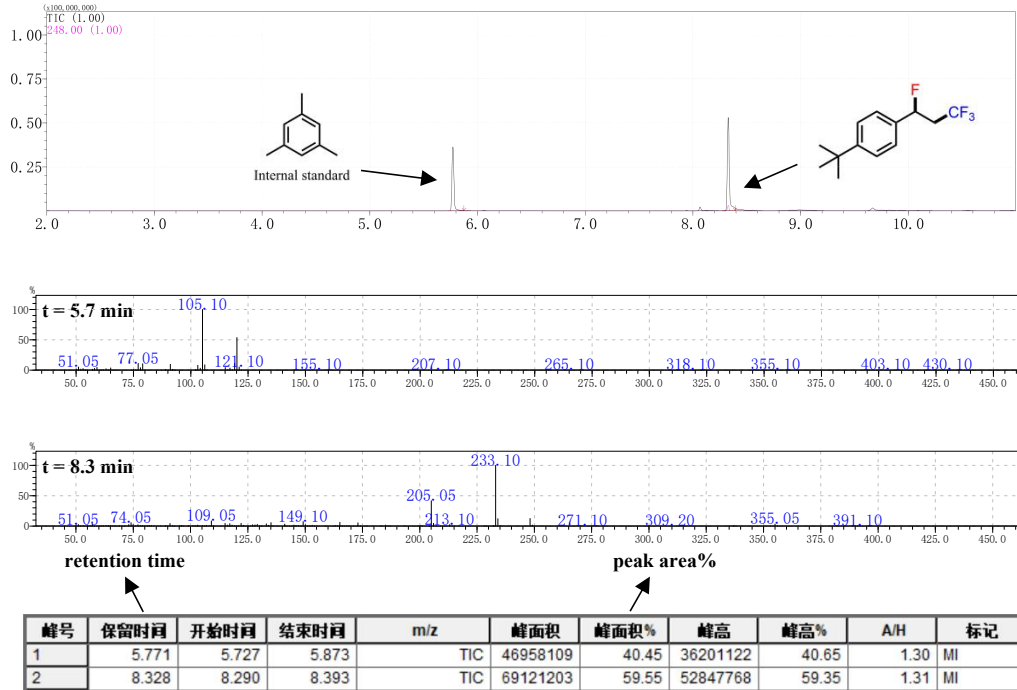

b) GC-MS of Internal standard and reaction solution

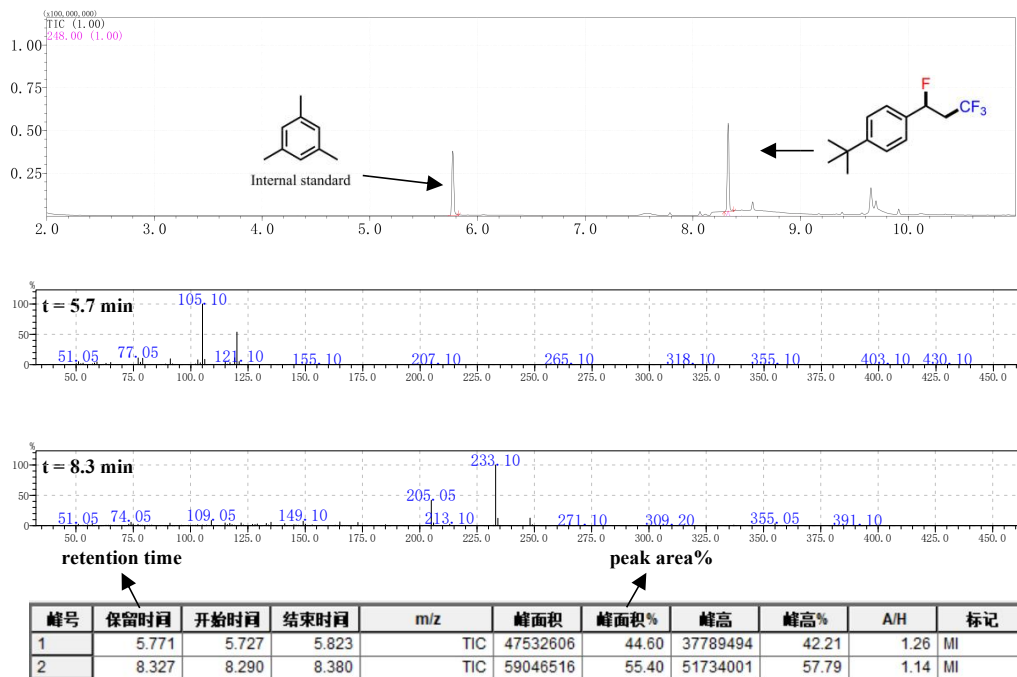

Figure S3. GC-MS analysis of *p*-*tert*-butylstyrene derived product.

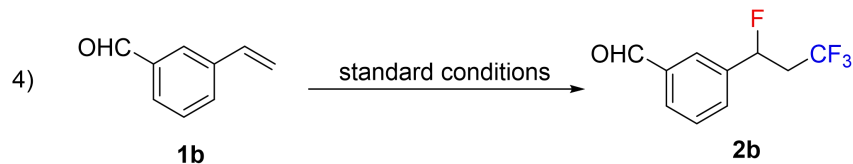

### a) GC-MS of Internal standard and pure product

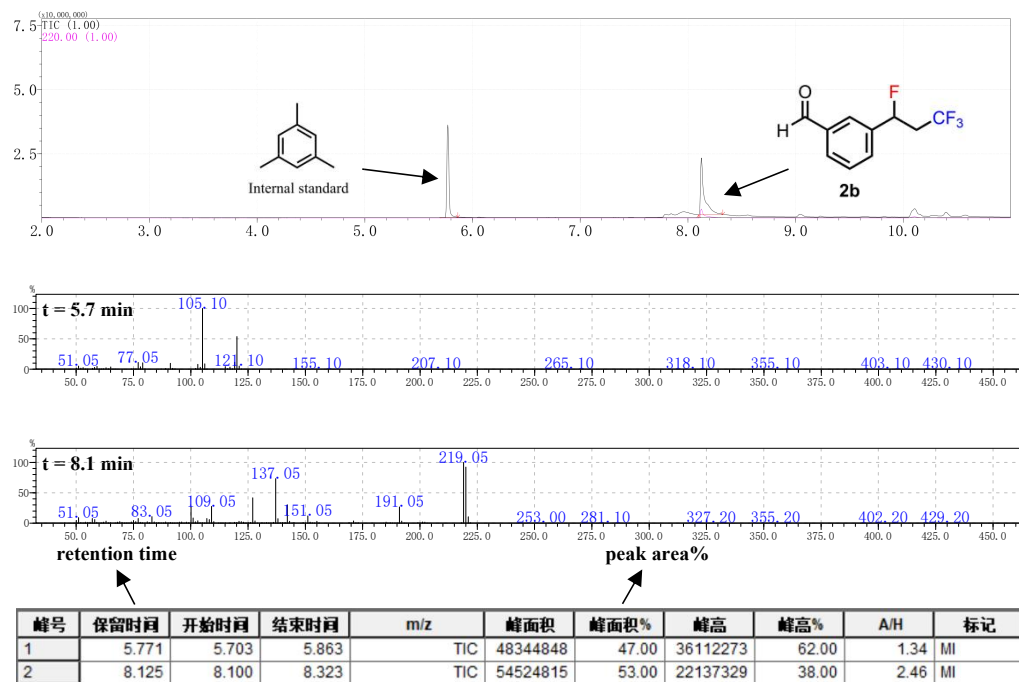

### b) GC-MS of Internal standard and reaction solution

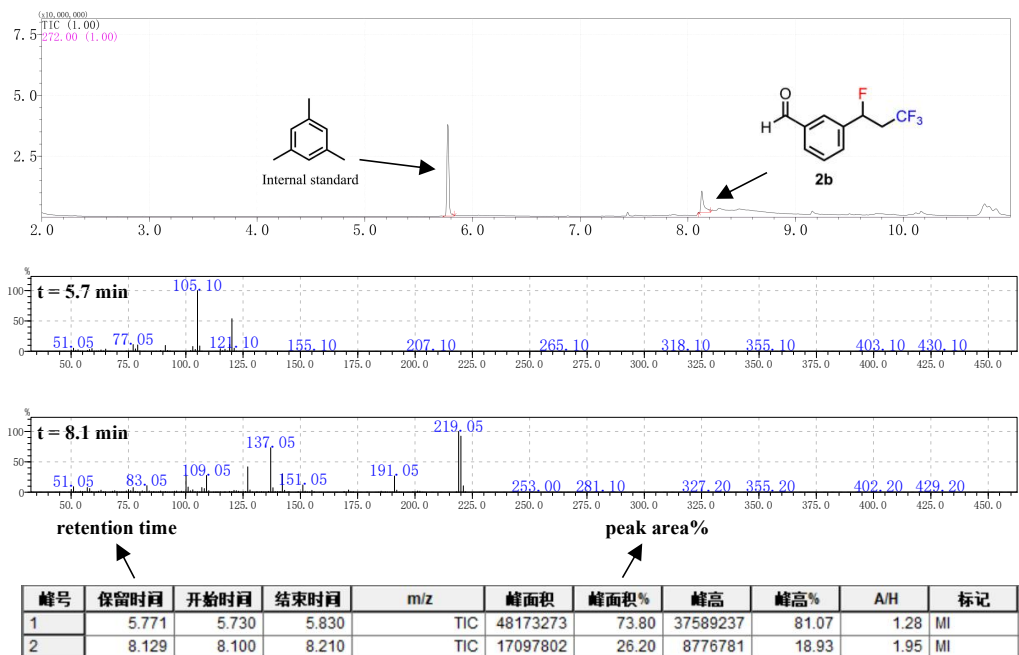

Figure S4. GC-MS analysis of 2b.

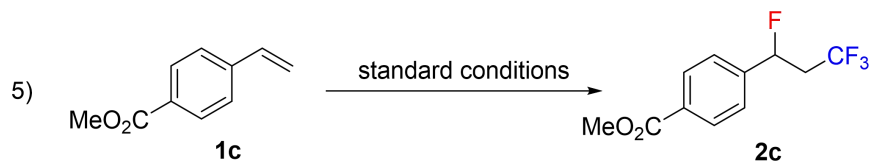

a) GC-MS of Internal standard and pure product

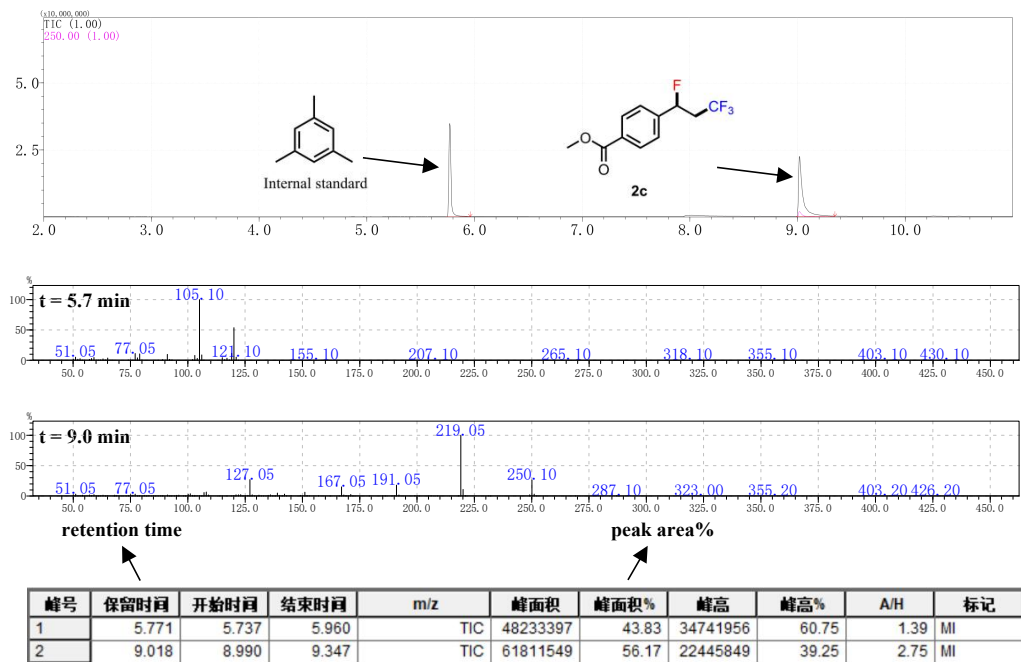

b) GC-MS of Internal standard and reaction solution

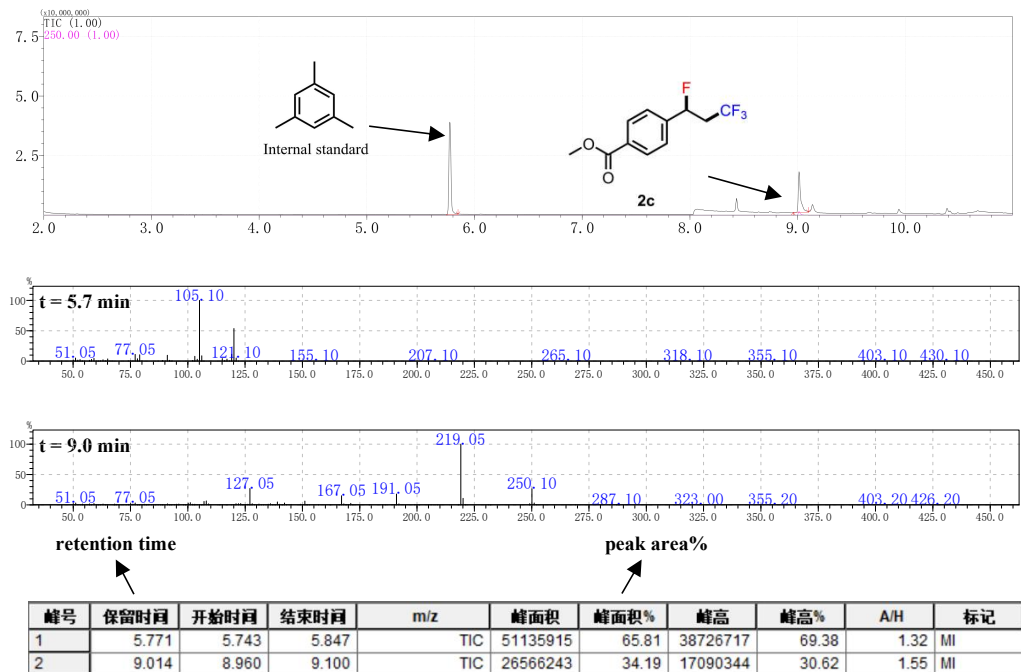

Figure S5. GC-MS analysis of 2c.

## 2.4 Complementary CV

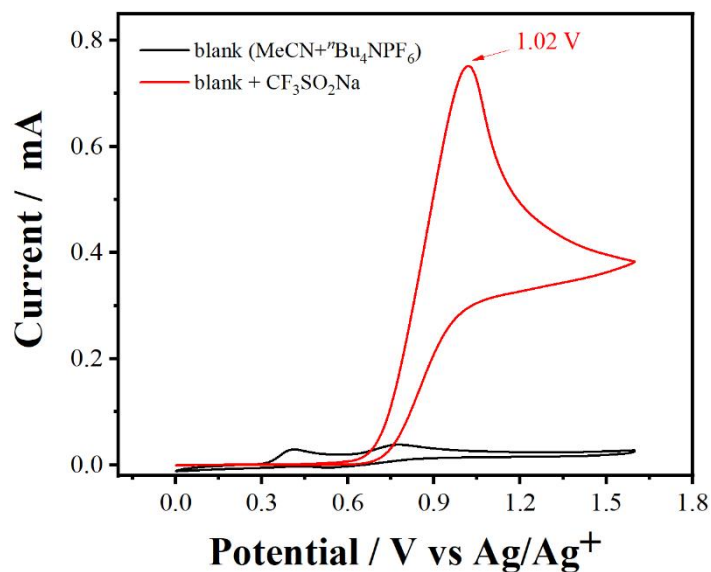

**Figure S6.** CV of  $\text{CF}_3\text{SO}_2\text{Na}$  in MeCN.

Test condition:  $\text{Bu}_4\text{NPF}_6$  (0.3 mmol),  $\text{CF}_3\text{SO}_2\text{Na}$  (0.4 mmol), MeCN (5.0 mL), glass carbon anode (4 mm diameter), Pt plate cathode (1 cm  $\times$  1 cm), scan rate was 0.1 V/s.

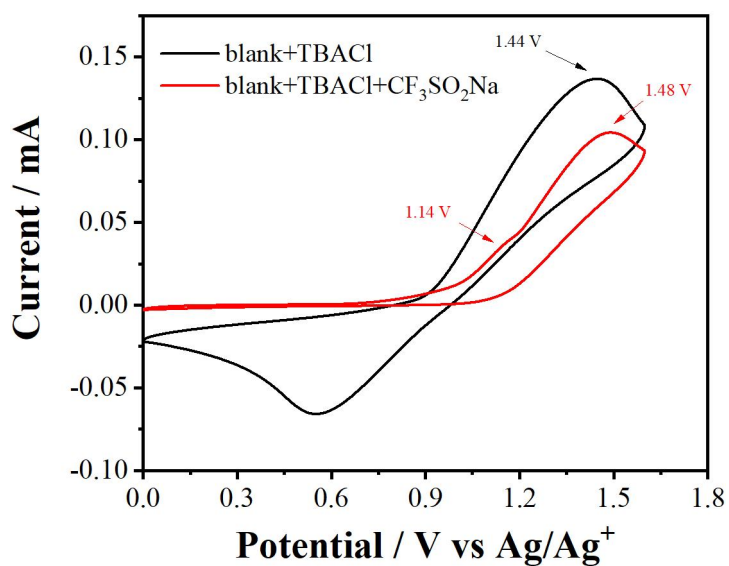

**Figure S7.** CV of TBACl and  $\text{CF}_3\text{SO}_2\text{Na}$  in DCE.

Test conditions:  $\text{Bu}_4\text{NPF}_6$  (0.3 mmol), TBACl (0.1 mmol),  $\text{CF}_3\text{SO}_2\text{Na}$  (0.4 mmol), DCE (5.0 mL), glass carbon anode (4 mm diameter), Pt plate cathode (1 cm  $\times$  1 cm), scan rate was 0.1 V/s.

## 2.5 The results of radical trapping experiments

### a) The BHT group

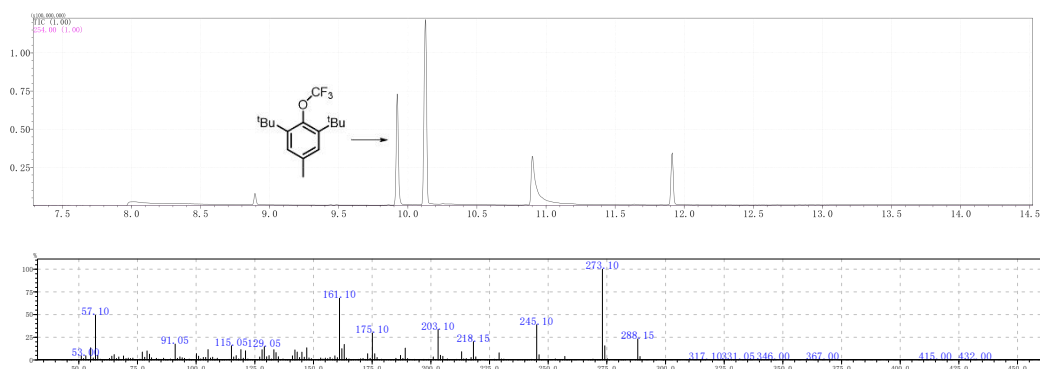

### b) The 1,1-diphenylethylene group

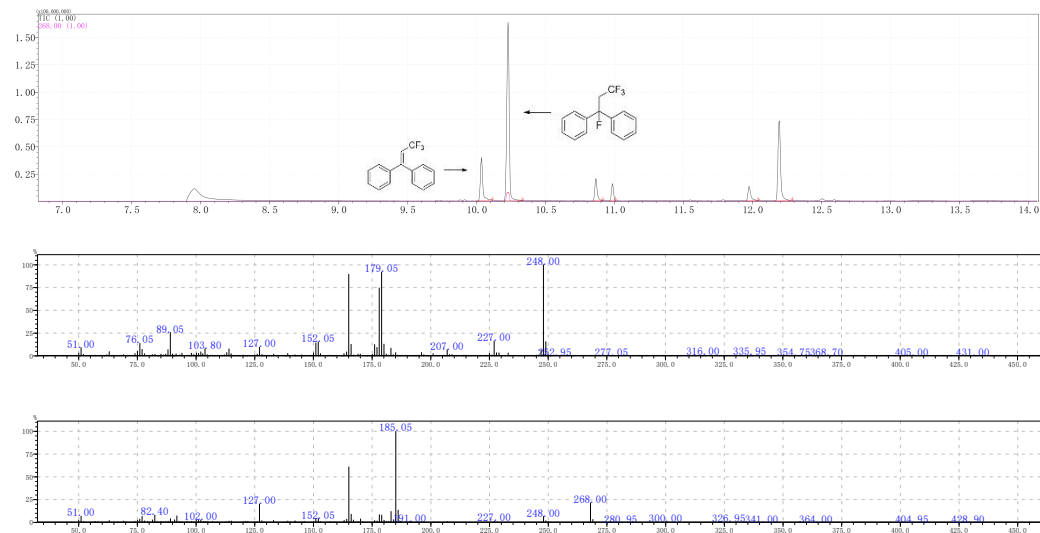

**Figure S8.** GC-MS of radical trapping reaction. (a) the BHT group; (b) the 1,1-diphenylethylene group.

### 3. Characterization of Products

#### 4-(1,3,3,3-Tetrafluoropropyl)-1,1'-biphenyl (2a)

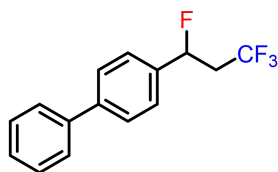

Yield: 70%. White solid. The reaction time: 12 h.

$^1\text{H NMR}$  ( $\text{CDCl}_3$ , 400 MHz):  $\delta$  7.66 (d,  $J = 8.0$  Hz, 2H), 7.61 (d,  $J = 7.4$  Hz, 2H), 7.52-7.45 (m, 3H), 7.44-7.37 (m, 2 H), 5.83 (dd,  $J = 47.8, 6.7$  Hz, 1 H), 2.97-2.84 (m, 1 H), 2.70-2.52 (m, 1 H).

$^{13}\text{C NMR}$  ( $\text{CDCl}_3$ , 101 MHz):  $\delta$  142.14 (d,  $J = 2.0$  Hz), 140.22, 140.21, 136.72 (d,  $J = 20.2$  Hz), 128.86, 127.70, 127.51, 127.37, 127.09, 126.22, 126.16, 125.91 (d,  $J = 7.0$  Hz), 125.11 (q,  $J = 275.7$  Hz), 87.89 (dq,  $J = 172.7, 4.0$  Hz), 41.31 (qd,  $J = 28.3, 25.3$  Hz).

$^{19}\text{F NMR}$  ( $\text{CDCl}_3$ , 376 MHz)  $\delta$  -64.83 (d,  $J = 7.7$  Hz), -175.61 (q,  $J = 7.8$  Hz).

#### 3-(1,3,3,3-Tetrafluoropropyl)benzaldehyde (2b)

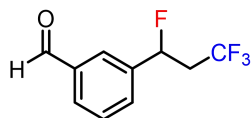

Yield: 20%. Colorless oil. The reaction time: 12 h.

$^1\text{H NMR}$  ( $\text{DMSO}-d_6$ , 400 MHz):  $\delta$  10.04 (s, 1H), 8.04 (s, 1H), 7.95 (d,  $J = 8.0$  Hz, 1H), 7.84 (d,  $J = 8.0$  Hz, 1H), 7.68 (t,  $J = 8.0$  Hz, 1H), 5.99 (dd,  $J = 47.9, 8$  Hz, 1H), 3.25-3.17 (m, 1H), 3.10-2.96 (m, 1H).

$^{13}\text{C NMR}$  ( $\text{DMSO}-d_6$ , 101 MHz):  $\delta$  192.86, 138.84 (d,  $J = 20.2$  Hz), 136.46, 132.14 (d,  $J = 6.1$  Hz), 130.28, 129.61, 126.96 (d,  $J = 6.1$  Hz), 125.85 (d,  $J = 278.8$  Hz), 87.64 (dq,  $J = 172.71, 4.0$  Hz).

$^{19}\text{F NMR}$  ( $\text{DMSO}-d_6$ , 376 MHz)  $\delta$  -59.92 (d,  $J = 7.5$  Hz), -172.81 (q,  $J = 7.5$  Hz).

#### Methyl 4-(1,3,3,3-tetrafluoropropyl)benzoate (2c)

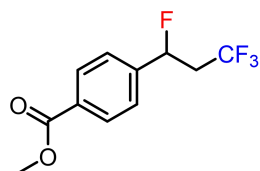

Yield: 36%. Colorless oil. The reaction time: 12 h.

$^1\text{H NMR}$  ( $\text{CDCl}_3$ , 400 MHz):  $\delta$  8.09 (d,  $J = 8.0$  Hz, 2H), 7.43 (d,  $J = 8.0$  Hz, 2H), 5.82 (dd,  $J = 47.7, 9.2$  Hz, 1H), 3.93 (s, 3H), 2.86-2.79 (m, 1H), 2.64-2.49 (m, 1H).

$^{13}\text{C NMR}$  ( $\text{CDCl}_3$ , 101 MHz):  $\delta$  166.35, 142.50 (d,  $J = 19.2$  Hz), 130.86, 130.84, 130.11, 129.92, 125.63, 125.56, 125.17 (d,  $J = 7.1$  Hz), 124.87 (d,  $J = 278.8$  Hz), 92.86, 91.08, 87.52 (dq,  $J = 177.8, 4.0$  Hz), 52.27, 41.39 (qd,  $J = 29.3, 25.2$  Hz).

$^{19}\text{F NMR}$  ( $\text{CDCl}_3$ , 376 MHz)  $\delta$  -64.14 (d,  $J = 7.5$  Hz), -179.02 (q,  $J = 7.5$  Hz).

#### 4-Isobutyl-4'-(1,3,3,3-tetrafluoropropyl)-1,1'-biphenyl (2d)

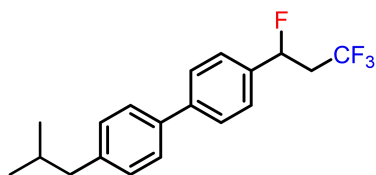

Yield: 55%. Light yellow oil. The reaction time: 12 h.

$^1\text{H NMR}$  ( $\text{CDCl}_3$ , 400 MHz):  $\delta$  7.63 (d,  $J = 8.0$  Hz, 2H), 7.51 (d,  $J = 8.0$  Hz, 2H), 7.42 (d,  $J = 7.9$  Hz, 2H), 7.23 (d,  $J = 8.0$  Hz, 2H), 5.81 (dd,  $J = 47.9, 6.9$  Hz, 1H), 2.95-2.83 (m, 1H), 2.70-2.54 (m, 1H), 2.52 (d,  $J = 7.2$  Hz, 2H), 1.91 (dt,  $J = 13.5, 6.7$  Hz, 1H), 0.94 (d,  $J = 6.6$  Hz, 6H).

$^{13}\text{C NMR}$  ( $\text{CDCl}_3$ , 101 MHz):  $\delta$  142.18 (d,  $J = 3.0$  Hz), 141.41, 137.56, 136.37 (d,  $J = 20.2$  Hz), 129.64, 127.36, 126.78, 125.88 (d,  $J = 6.1$  Hz), 125.12 (q,  $J = 277.8$  Hz), 87.97 (dq,  $J = 175.7, 3.0$  Hz), 45.06, 41.43 (qd,  $J = 29.3, 26.2$ , Hz), 30.24, 22.39.

$^{19}\text{F NMR}$  ( $\text{CDCl}_3$ , 376 MHz)  $\delta$  -64.15 (d,  $J = 7.9$  Hz), -174.72 (q,  $J = 7.9$  Hz).

#### 4-(Tert-butyl)-4'-(1,3,3,3-tetrafluoropropyl)-1,1'-biphenyl (2e)

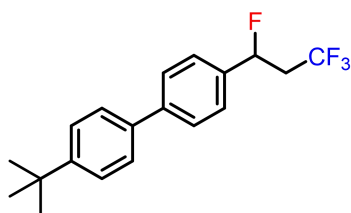

Yield: 40%. White solid. Melting point: 75°C. The reaction time: 12 h.

$^1\text{H NMR}$  ( $\text{CDCl}_3$ , 400 MHz):  $\delta$  7.64 (d,  $J = 8.0$  Hz, 2H), 7.54 (d,  $J = 8.3$  Hz, 2H), 7.49 (d,  $J = 8.4$  Hz, 2H), 7.42 (d,  $J = 7.9$  Hz, 2H), 5.81 (dd,  $J = 47.8, 6.9$  Hz, 1H), 2.98-2.81 (m, 1H), 2.70-2.49 (m, 1H), 1.37 (s, 9H).

$^{13}\text{C NMR}$  ( $\text{CDCl}_3$ , 101 MHz):  $\delta$  150.82, 142.06 (d,  $J = 2.0$  Hz), 137.32, 136.41 (d,  $J = 20.2$  Hz), 128.49, 127.40, 126.77, 125.88 (d,  $J = 7.1$  Hz), 125.83, 125.12 (q,  $J = 276.7$  Hz), 87.96 (dq,  $J = 171.2, 4.04$  Hz), 41.45 (qd,  $J = 29.3, 26.3$  Hz), 34.57, 31.32.

$^{19}\text{F NMR}$  ( $\text{CDCl}_3$ , 376 MHz)  $\delta$  -64.18 (d,  $J = 7.9$  Hz), -174.76 (q,  $J = 7.9$  Hz).

#### 3-(Tert-butyl)-4'-(1,3,3,3-tetrafluoropropyl)-1,1'-biphenyl (2f)

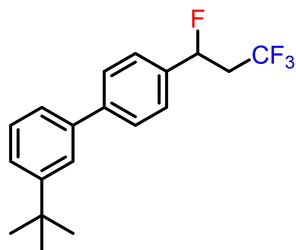

Yield: 76%. Light blue transparent oil. The reaction time: 12 h.

$^1\text{H NMR}$  ( $\text{CDCl}_3$ , 400 MHz):  $\delta$  7.64 (d,  $J = 7.9$  Hz, 2H), 7.59 (s, 1H), 7.46 – 7.38 (m, 5H), 5.82 (dd,  $J = 47.8, 6.8$  Hz, 1H), 2.98-2.81 (m, 1H), 2.70-2.49 (m, 1H), 1.38 (s, 9H).



$^{13}\text{C}$  NMR ( $\text{CDCl}_3$ , 101 MHz):  $\delta$  151.78, 142.88 (d,  $J = 2.0$  Hz), 140.07, 136.56 (d,  $J = 20.2$  Hz), 128.59, 127.74, 125.86 (d,  $J = 6.1$  Hz), 125.12 (q,  $J = 276.7$  Hz), 124.77, 124.39, 124.28, 123.75, 87.95 (dq,  $J = 172.7, 3.0$  Hz), 41.47 (qd,  $J = 28.3, 26.3$  Hz), 34.83, 31.38.

$^{19}\text{F}$  NMR ( $\text{CDCl}_3$ , 376 MHz)  $\delta$  -64.13 (d,  $J = 8.0$  Hz), -174.85 (q,  $J = 7.9$  Hz).

### 3,5-Di-tert-butyl-4'-(1,3,3,3-tetrafluoropropyl)-1,1'-biphenyl (2g)

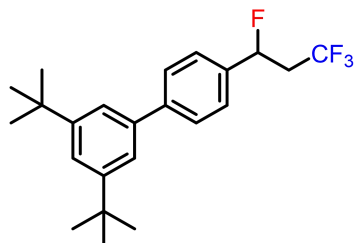

Yield: 75%. Light blue transparent oil. The reaction time: 12 h.

$^1\text{H}$  NMR ( $\text{CDCl}_3$ , 400 MHz):  $\delta$  7.64 (d,  $J = 7.9$  Hz, 2H), 7.48-7.46 (m, 1H), 7.44 (s, 1H), 7.43-7.38 (m, 3H), 5.82 (dd,  $J = 47.8, 6.8$  Hz, 1H), 2.99-2.81 (m, 1H), 2.70-2.49 (m, 1H), 1.39 (s, 18H).

$^{13}\text{C}$  NMR ( $\text{CDCl}_3$ , 101 MHz):  $\delta$  151.31, 143.53 (d,  $J = 2.0$  Hz), 139.75, 136.39 (d,  $J = 20.2$  Hz), 127.89, 125.81 (q,  $J = 7.1$  Hz), 125.13 (q,  $J = 278.7$  Hz), 121.88, 121.65, 87.99 (dq,  $J = 171.7, 4.0$  Hz), 41.48 (qd,  $J = 29.29, 25.25$  Hz), 34.99, 31.51.

$^{19}\text{F}$  NMR ( $\text{CDCl}_3$ , 376 MHz)  $\delta$  -64.13 (d,  $J = 8.0$  Hz), -174.67 (q,  $J = 7.9$  Hz).

### Methyl 2-(4'-(1,3,3,3-tetrafluoropropyl)-[1,1'-biphenyl]-4-yl)acetate (2h)

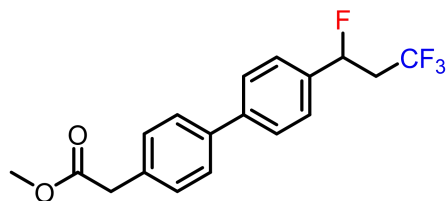

Yield: 60%. White solid. Melting point: 91.7°C. The reaction time: 12 h.

$^1\text{H}$  NMR ( $\text{CDCl}_3$ , 400 MHz):  $\delta$  7.62 (d,  $J = 8.0$  Hz, 2H), 7.55 (d,  $J = 8.1$  Hz, 2H), 7.43 (d,  $J = 7.9$  Hz, 2H), 7.37 (d,  $J = 7.7$  Hz, 2H), 5.81 (dd,  $J = 46.5, 10.6$  Hz, 1H), 3.72 (s, 3H), 3.69 (d,  $J = 4.3$  Hz, 2H), 2.97-2.81 (m, 1H), 2.67-2.49 (m, 1H).

$^{13}\text{C}$  NMR ( $\text{CDCl}_3$ , 101 MHz):  $\delta$  171.88, 141.73 (d,  $J = 3.0$  Hz), 139.10, 136.73 (d,  $J = 20.2$  Hz), 133.51, 129.79, 127.46, 127.29, 126.47, 125.91 (d,  $J = 6.1$  Hz), 125.08 (q,  $J = 276.7$  Hz), 87.89 (dq,  $J = 171.7, 3.0$  Hz), 61.06, 52.10, 41.41 (qd,  $J = 29.29, 25.25$  Hz), 40.75.

$^{19}\text{F}$  NMR ( $\text{CDCl}_3$ , 376 MHz)  $\delta$  -64.14 (d,  $J = 7.8$  Hz), -175.06 (q,  $J = 7.8$  Hz).

HRMS (ESI $^+$ ): calculated for  $\text{C}_{18}\text{H}_{16}\text{F}_4\text{O}_2^+$  [ $\text{M} + \text{H}$ ] $^+$ : 341.1160; found: 341.1158.

### Trimethyl(4'-(1,3,3,3-tetrafluoropropyl)-[1,1'-biphenyl]-4-yl)silane (2i)

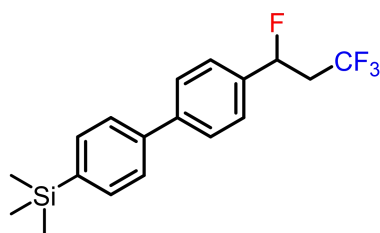

Yield: 54%. Light blue oil. The reaction time: 12 h.

$^1\text{H NMR}$  ( $\text{CDCl}_3$ , 400 MHz):  $\delta$  7.66-7.57 (m, 6H), 7.43 (d,  $J = 7.6$  Hz, 2H), 5.88 (dd,  $J = 48.4, 6.7$  Hz, 1H), 2.97-2.80 (m, 1H), 2.71-2.46 (m, 1H), 0.31 (s, 9H).

$^{13}\text{C NMR}$  ( $\text{CDCl}_3$ , 101 MHz):  $\delta$  141.82 (d,  $J = 2.0$  Hz), 140.58, 136.44 (d,  $J = 19.2$  Hz), 133.91, 129.42, 127.58, 126.44, 125.58 (d,  $J = 7.1$  Hz), 125.23 (q,  $J = 221.2$  Hz), 87.58 (dq,  $J = 172.7, 3.0$  Hz), 41.13 (qd,  $J = 29.29, 25.25$  Hz), 29.36.

$^{19}\text{F NMR}$  ( $\text{CDCl}_3$ , 376 MHz)  $\delta$  -64.18 (d,  $J = 8.0$  Hz), -175.04 (q,  $J = 7.9$  Hz).

### 2-Fluoro-4'-(1,3,3,3-tetrafluoropropyl)-1,1'-biphenyl (2j)

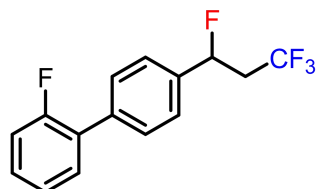

Yield: 53%. Colorless oil. The reaction time: 12 h.

$^1\text{H NMR}$  ( $\text{CDCl}_3$ , 400 MHz):  $\delta$  7.61 (d,  $J = 7.8$  Hz, 2H), 7.44 (d,  $J = 7.5$  Hz, 2H), 7.36-7.13 (m, 4H), 5.82 (dd,  $J = 47.8, 6.9$  Hz, 1H), 2.96-2.80 (m, 2H), 2.70-2.49 (m, 1H).

$^{13}\text{C NMR}$  ( $\text{CDCl}_3$ , 101 MHz):  $\delta$  160.96, 158.49, 137.15 (d,  $J = 20.2$  Hz), 136.79, 136.79, 130.63 (d,  $J = 3.0$  Hz), 129.48 (d,  $J = 3.0$  Hz), 129.38, 128.15 (d,  $J = 13.1$  Hz), 127.15, 125.52 (d,  $J = 7.0$  Hz), 125.09 (q,  $J = 276.7$  Hz), 124.47 (d,  $J = 3.0$  Hz), 116.19 (d,  $J = 23.2$  Hz), 87.88 (dq,  $J = 173.7, 3.0$  Hz), 41.48 (qd,  $J = 28.28, 25.25$  Hz).

$^{19}\text{F NMR}$  ( $\text{CDCl}_3$ , 376 MHz)  $\delta$  -64.73 (d,  $J = 7.6$  Hz), -118.59 (q,  $J = 7.8$  Hz), -176.36 (q,  $J = 7.7$  Hz).

### 3-Fluoro-4'-(1,3,3,3-tetrafluoropropyl)-1,1'-biphenyl (2k)

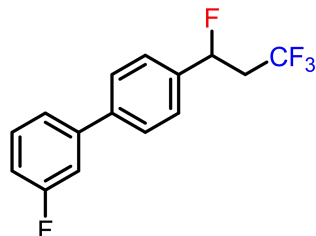

Yield: 52%. Colorless oil. The reaction time: 12 h.

$^1\text{H NMR}$  ( $\text{CDCl}_3$ , 400 MHz):  $\delta$  7.59 (d,  $J = 8.0$  Hz, 2H), 7.45-7.29 (m, 5H), 7.15 (t,  $J = 8.7$  Hz, 2H), 5.82 (dd,  $J = 47.8, 6.6$  Hz, 1H), 2.98-2.80 (m, 1H), 2.70-2.49 (m, 1H).

$^{13}\text{C}$  NMR ( $\text{CDCl}_3$ , 101 MHz):  $\delta$  163.19 (d,  $J = 247.4$  Hz), 142.49 (d,  $J = 8.1$  Hz), 140.90, 137.37 (d,  $J = 20.2$  Hz), 130.37 (d,  $J = 8.1$  Hz), 127.56, 127.38, 126.15, 126.00 (d,  $J = 6.1$  Hz), 123.83, 122.76 (d,  $J = 3.0$  Hz), 114.39 (d,  $J = 48.5$  Hz), 114.18 (d,  $J = 49.5$  Hz), 87.80 (d,  $J = 175.7$  Hz), 41.52 (qd,  $J = 29.3, 26.2$ , Hz).

$^{19}\text{F}$  NMR ( $\text{CDCl}_3$ , 376 MHz)  $\delta$  -64.13 (d,  $J = 8.0$  Hz), -112.80, -175.63 (q,  $J = 7.8$  Hz).

#### 4-Fluoro-4'-(1,3,3,3-tetrafluoropropyl)-1,1'-biphenyl (2l)

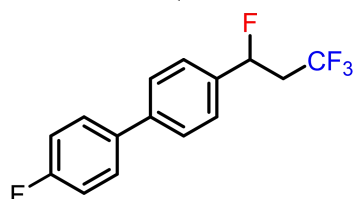

Yield: 59%. Colorless oil. The reaction time: 12 h.

$^1\text{H}$  NMR ( $\text{CDCl}_3$ , 400 MHz):  $\delta$  7.59 (d,  $J = 8.0$  Hz, 2H), 7.55 (dd,  $J = 8.7, 5.3$  Hz, 2H), 7.43 (d,  $J = 7.9$  Hz, 2H), 7.15 (t,  $J = 8.7$  Hz, 2H), 5.82 (dd,  $J = 47.8, 6.6$  Hz, 1H), 2.98-2.80 (m, 1H), 2.70-2.49 (m, 1H).

$^{13}\text{C}$  NMR ( $\text{CDCl}_3$ , 101 MHz):  $\delta$  162.69 (d,  $J = 248.5$  Hz), 141.23 (d,  $J = 2.0$  Hz), 136.76 (d,  $J = 20.2$  Hz), 136.37 (d,  $J = 3.0$  Hz), 129.48, 128.72 (d,  $J = 8.0$  Hz), 127.44, 125.98 (d,  $J = 6.1$  Hz), 125.07 (q,  $J = 276.7$  Hz), 115.78 (d,  $J = 21.2$  Hz), 87.88 (dq,  $J = 172.7, 3.0$  Hz), 41.46 (qd,  $J = 29.29, 26.26$  Hz).

$^{19}\text{F}$  NMR ( $\text{CDCl}_3$ , 376 MHz)  $\delta$  -64.13 (d,  $J = 7.7$  Hz), -114.98, -175.16 (q,  $J = 7.4$  Hz).

#### 3'-(1,3,3,3-Tetrafluoropropyl)-3-(trifluoromethyl)-1,1'-biphenyl (2m)

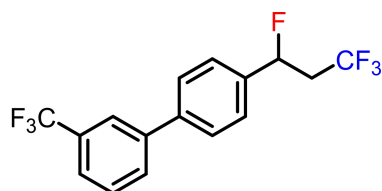

Yield: 67%. Light blue transparent oil. The reaction time: 12 h.

$^1\text{H}$  NMR ( $\text{CDCl}_3$ , 400 MHz):  $\delta$  7.83 (s, 1H), 7.77 (d,  $J = 7.6$  Hz, 1H), 7.70-7.62 (m, 3H), 7.58 (t,  $J = 7.7$  Hz, 1H), 7.47 (d,  $J = 7.9$  Hz, 2H), 5.83 (dd,  $J = 47.7, 6.5$  Hz, 1H), 2.97-2.81 (m, 1H), 2.69-2.52 (m, 1H).

$^{13}\text{C}$  NMR ( $\text{CDCl}_3$ , 101 MHz):  $\delta$  141.06, 140.71 (d,  $J = 2.0$  Hz), 137.62 (d,  $J = 20.0$  Hz), 131.32 (d,  $J = 32.2$  Hz), 130.41, 129.38, 127.67, 126.11 (d,  $J = 7.1$  Hz), 125.57 (q,  $J = 277.8$  Hz), 124.17 (q,  $J = 46.5$  Hz), 124.13 (q,  $J = 46.5$  Hz), 87.82 (d,  $J = 176.8$  Hz), 41.43 (qd,  $J = 29.3, 26.2$ , Hz).

$^{19}\text{F}$  NMR ( $\text{CDCl}_3$ , 376 MHz)  $\delta$  -62.66 (d,  $J = 8.2$  Hz), -64.12 (d,  $J = 7.9$  Hz), -175.88 (q,  $J = 7.8$  Hz).

#### 4-(1,3,3,3-Tetrafluoropropyl)-4'-(trifluoromethyl)-1,1'-biphenyl (2n)

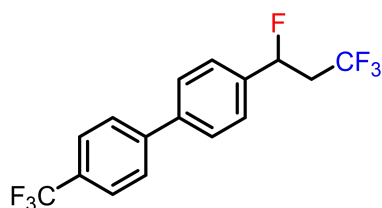

Yield: 61%. White solid. Melting point: 68.5°C. The reaction time: 12 h.

<sup>1</sup>H NMR (CDCl<sub>3</sub>, 400 MHz): δ 7.74-7.62 (m, 6H), 7.47 (d, *J* = 8.0 Hz, 2H), 5.84 (dd, *J* = 47.7, 6.5 Hz, 1H), 3.02-2.76 (m, 1H), 2.74-2.47 (m, 1H).

<sup>13</sup>C NMR (CDCl<sub>3</sub>, 101 MHz): δ 143.76, 140.70 (d, *J* = 2.1 Hz), 137.78 (d, *J* = 19.8 Hz), 129.80 (d, *J* = 32.4 Hz), 129.23 (d, *J* = 6.1 Hz), 129.21 (q, *J* = 218.2 Hz), 124.2 (q, *J* = 272.7 Hz), 126.09 (d, *J* = 6.1 Hz), 125.83 (q, *J* = 4.0 Hz), 125.05 (q, *J* = 278.8 Hz), 87.80 (dq, *J* = 176.8, 2.0 Hz), 41.43 (qd, *J* = 29.4, 26.4 Hz).

<sup>19</sup>F NMR (CDCl<sub>3</sub>, 376 MHz) δ -62.48, -64.13 (d, *J* = 7.8 Hz), -175.93 (q, *J* = 7.8 Hz).

#### 4-(1,3,3,3-Tetrafluoropropyl)-4'-(trifluoromethoxy)-1,1'-biphenyl (2o)

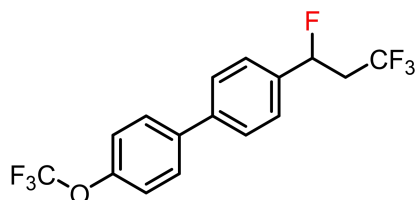

Yield: 60%. Colorless oil. The reaction time: 12 h.

<sup>1</sup>H NMR (CDCl<sub>3</sub>, 400 MHz): δ 7.62-7.58 (m, 4H), 7.44 (d, *J* = 7.8 Hz, 2H), 7.30 (d, *J* = 8.3 Hz, 2H), 5.82 (dd, *J* = 47.7, 6.5 Hz, 1H), 2.96-2.81 (m, 1H), 2.69-2.52 (m, 1H).

<sup>13</sup>C NMR (CDCl<sub>3</sub>, 101 MHz): δ 148.93 (d, *J* = 2.0 Hz), 140.79 (d, *J* = 2.0 Hz), 138.97, 137.18 (d, *J* = 20.2 Hz), 128.49, 127.55, 126.42, 126.03 (q, *J* = 278.8 Hz), 125.13 (q, *J* = 278.8 Hz), 87.83 (dq, *J* = 176.8, 4.0 Hz), 41.45 (qd, *J* = 29.3, 26.3 Hz).

<sup>19</sup>F NMR (CDCl<sub>3</sub>, 376 MHz) δ -58.33, -64.64 (d, *J* = 6.9 Hz), -176.03 (q, *J* = 7.0 Hz).

#### 2-Chloro-4'-(1,3,3,3-tetrafluoropropyl)-1,1'-biphenyl (2p)

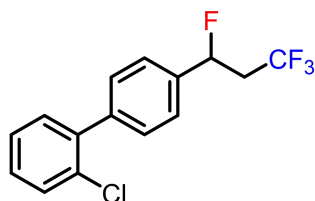

Yield: 67%. Colorless oil. The reaction time: 12 h.

<sup>1</sup>H NMR (CDCl<sub>3</sub>, 400 MHz): δ 7.52-7.47 (m, 3H), 7.43 (d, *J* = 8.0 Hz, 2H), 7.35-7.28 (m, 3H), 5.83 (dd, *J* = 47.8, 7.1 Hz, 1H), 2.99-2.80 (m, 1H), 2.72-2.50 (m, 1H).

<sup>13</sup>C NMR (CDCl<sub>3</sub>, 101 MHz): δ 140.34 (d, *J* = 2.0 Hz), 139.61, 137.10 (d, *J* = 20.2 Hz), 132.40, 131.24, 130.03, 129.96, 129.83, 128.89, 128.86, 127.35, 126.92, 125.47, 125.44 (d, *J* = 6.1 Hz), 125.11 (q, *J* = 277.8 Hz), 87.90 (dq, *J* = 172.7, 3.0 Hz), 41.50 (qd, *J* = 29.29, 26.26 Hz).

<sup>19</sup>F NMR (CDCl<sub>3</sub>, 376 MHz) δ -64.19 (d, *J* = 7.8 Hz), -175.75 (q, *J* = 7.7 Hz).

### 3-Chloro-4'-(1,3,3,3-tetrafluoropropyl)-1,1'-biphenyl (2q)

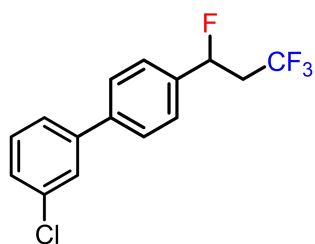

Yield: 71%. Colorless oil. The reaction time: 12 h.

$^1\text{H NMR}$  ( $\text{CDCl}_3$ , 400 MHz):  $\delta$  7.61 (d,  $J = 8.0$  Hz, 2H), 7.57 (s, 1H), 7.47-7.32 (m, 5H), 5.82 (dd,  $J = 47.7, 6.6$  Hz, 1H), 2.98-2.79 (m, 1H), 2.71-2.48 (m, 1H).

$^{13}\text{C NMR}$  ( $\text{CDCl}_3$ , 101 MHz):  $\delta$  142.07, 140.76, 140.75, 137.40 (d,  $J = 20.2$  Hz), 134.79, 130.11, 129.17, 127.72, 127.56, 127.27, 126.01 (d,  $J = 6.1$  Hz), 125.27, 125.04 (q,  $J = 275.7$  Hz), 87.81 (dq,  $J = 173.7, 3.0$  Hz), 41.47 (qd,  $J = 28.28, 26.26$  Hz).

$^{19}\text{F NMR}$  ( $\text{CDCl}_3$ , 376 MHz)  $\delta$  -64.11 (d,  $J = 8.0$  Hz), -175.67 (q,  $J = 7.9$  Hz).

### 4-Chloro-4'-(1,3,3,3-tetrafluoropropyl)-1,1'-biphenyl (2r)

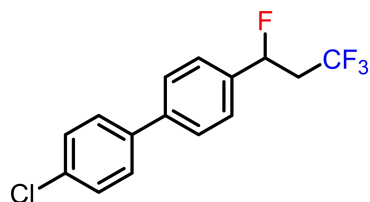

Yield: 58%. White solid. Melting point: 87°C. The reaction time: 12 h.

$^1\text{H NMR}$  ( $\text{CDCl}_3$ , 400 MHz):  $\delta$  7.60 (d,  $J = 8.0$  Hz, 2H), 7.52 (d,  $J = 8.5$  Hz, 2H), 7.46-7.35 (m, 4H), 5.82 (dd,  $J = 47.7, 6.5$  Hz, 1H), 2.92-2.85 (m, 1H), 2.70-2.48 (m, 1H).

$^{13}\text{C NMR}$  ( $\text{CDCl}_3$ , 101 MHz):  $\delta$  140.95 (d,  $J = 2.0$  Hz), 138.68, 137.11 (d,  $J = 20.2$  Hz), 133.89, 129.04, 128.36, 127.41, 126.02 (d,  $J = 6.1$  Hz), 125.06 (q,  $J = 277.8$  Hz), 87.84 (dq,  $J = 172.7, 3.0$  Hz), 41.45 (qd,  $J = 29.29, 26.26$  Hz).

$^{19}\text{F NMR}$  ( $\text{CDCl}_3$ , 376 MHz)  $\delta$  -64.11 (d,  $J = 7.7$  Hz), -175.39 (q,  $J = 7.6$  Hz).

### 6-(4-(1,3,3,3-Tetrafluoropropyl)phenyl)-2,3-dihydrobenzo[b][1,4]dioxine (2s)

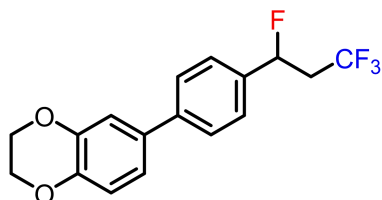

Yield: 35%. Colorless oil. The reaction time: 12 h.

$^1\text{H NMR}$  ( $\text{CDCl}_3$ , 400 MHz):  $\delta$  7.59-7.40 (m, 3H), 7.38 (s, 1H), 7.19-6.98 (m, 2H), 6.96-6.83 (m, 1H), 5.79 (dd,  $J = 47.7, 6.9$  Hz, 1H), 4.29 (d,  $J = 8.4$  Hz, 4H), 2.97-2.78 (m, 1H), 2.70-2.47 (m, 1H).

$^{13}\text{C NMR}$  ( $\text{CDCl}_3$ , 101 MHz):  $\delta$  143.76, 143.52, 141.59, 136.33, 136.13, 133.74, 130.02, 127.43, 127.11, 125.92, 125.86, 125.04, 124.98, 121.43, 120.13, 119.38, 117.67, 115.85, 112.66, 88.82, 88.79, 87.08, 87.04, 64.41, 41.71, 41.43, 41.14.

$^{19}\text{F NMR}$  ( $\text{CDCl}_3$ , 376 MHz)  $\delta$  -64.16 (d,  $J = 7.7$  Hz), -174.66 (q,  $J = 7.8$  Hz).

## 2-(4-(1,3,3,3-Tetrafluoropropyl)phenyl)naphthalene (2t)

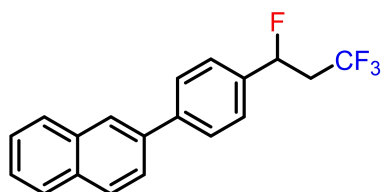

Yield: 48%. Colorless oil. The reaction time: 12 h.

$^1\text{H NMR}$  ( $\text{CDCl}_3$ , 400 MHz):  $\delta$  8.05 (s, 1H), 7.96-7.86 (m, 3H), 7.80-7.71 (m, 3H), 7.57-7.48 (m, 4H), 5.85 (dd,  $J = 46.5, 10.7$  Hz, 1H), 2.98-2.84 (m, 1H), 2.73-2.51 (m, 1H).

$^{13}\text{C NMR}$  ( $\text{CDCl}_3$ , 101 MHz):  $\delta$  142.12 (d,  $J = 2.0$  Hz), 137.54, 136.80 (d,  $J = 20.2$  Hz), 133.60, 132.78, 128.59, 128.21, 127.83, 127.66, 126.45, 126.20, 126.00 (d,  $J = 7.1$  Hz), 125.29, 125.18 (q,  $J = 290.9$  Hz), 87.94 (dq,  $J = 172.7, 3.0$  Hz), 41.48 (qd,  $J = 29.29, 26.26$  Hz).

$^{19}\text{F NMR}$  ( $\text{CDCl}_3$ , 376 MHz)  $\delta$  -64.09 (d,  $J = 8.0$  Hz), -175.06 (q,  $J = 8.0$  Hz).

## 4-(4-(1,3,3,3-Tetrafluoropropyl)phenyl)pyridine (2u)

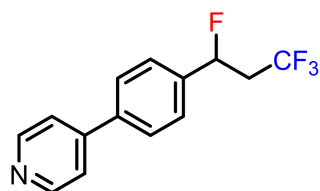

Yield: 63%. Colorless oil. The reaction time: 12 h.

$^1\text{H NMR}$  ( $\text{CDCl}_3$ , 400 MHz):  $\delta$  8.69 (d,  $J = 4.6$  Hz, 2H), 7.69 (d,  $J = 8.0$  Hz, 2H), 7.50 (t,  $J = 7.6$  Hz, 4H), 5.83 (dd,  $J = 49.0, 10.7$  Hz, 1H), 2.97-2.79 (m, 1H), 2.71-2.49 (m, 1H).

$^{13}\text{C NMR}$  ( $\text{CDCl}_3$ , 101 MHz):  $\delta$  150.28, 147.44, 139.05 (d,  $J = 2.0$  Hz), 138.67 (d,  $J = 19.2$  Hz), 127.50, 126.16 (d,  $J = 7.1$  Hz), 124.96 (q,  $J = 276.7$  Hz), 121.60, 87.67 (dq,  $J = 174.7, 3.0$  Hz), 41.45 (qd,  $J = 28.28, 26.26$  Hz).

$^{19}\text{F NMR}$  ( $\text{CDCl}_3$ , 376 MHz)  $\delta$  -64.08 (d,  $J = 7.8$  Hz), -176.61 (q,  $J = 7.7$  Hz).

**HRMS** ( $\text{ESI}^+$ ): calculated for  $\text{C}_{14}\text{H}_{11}\text{F}_3\text{N}^+$  [ $\text{M} + \text{H}$ ] $^+$ : 251.0922; found: 251.0918.

#### 4. References

- (1) Pfeifer, L.; Gouverneur, V. Controlled Single and Double Iodofluorination of Alkynes with DIH- and HF-Based Reagents. *Org. Lett.* **2018**, *20*, 1576-1579.
- (2) C. Liu, R. Li, W. Zhou, Y. Liang, Y. Shi, R.-L. Li, Y. Ling, Y. Yu, J. Li, B. Zhang, Selectivity Origin of Organic Electrosynthesis Controlled by Electrode Materials: A Case Study on Pinacols, *ACS Catal.* **2018**, *11*, 8958-8967.

## 5. NMR spectra of Products

### 4-(1,3,3,3-Tetrafluoropropyl)-1,1'-biphenyl (2a)

(<sup>1</sup>H NMR, CDCl<sub>3</sub>, 400 MHz)

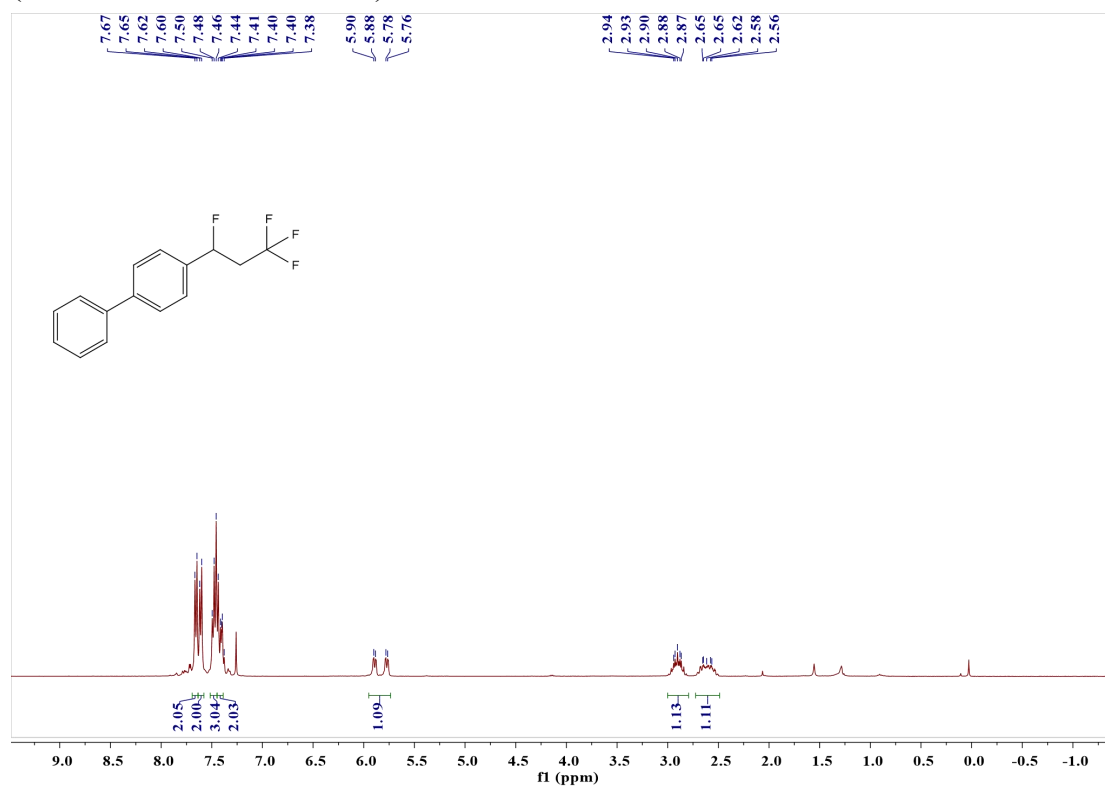

(<sup>13</sup>C NMR, CDCl<sub>3</sub>, 101 MHz)

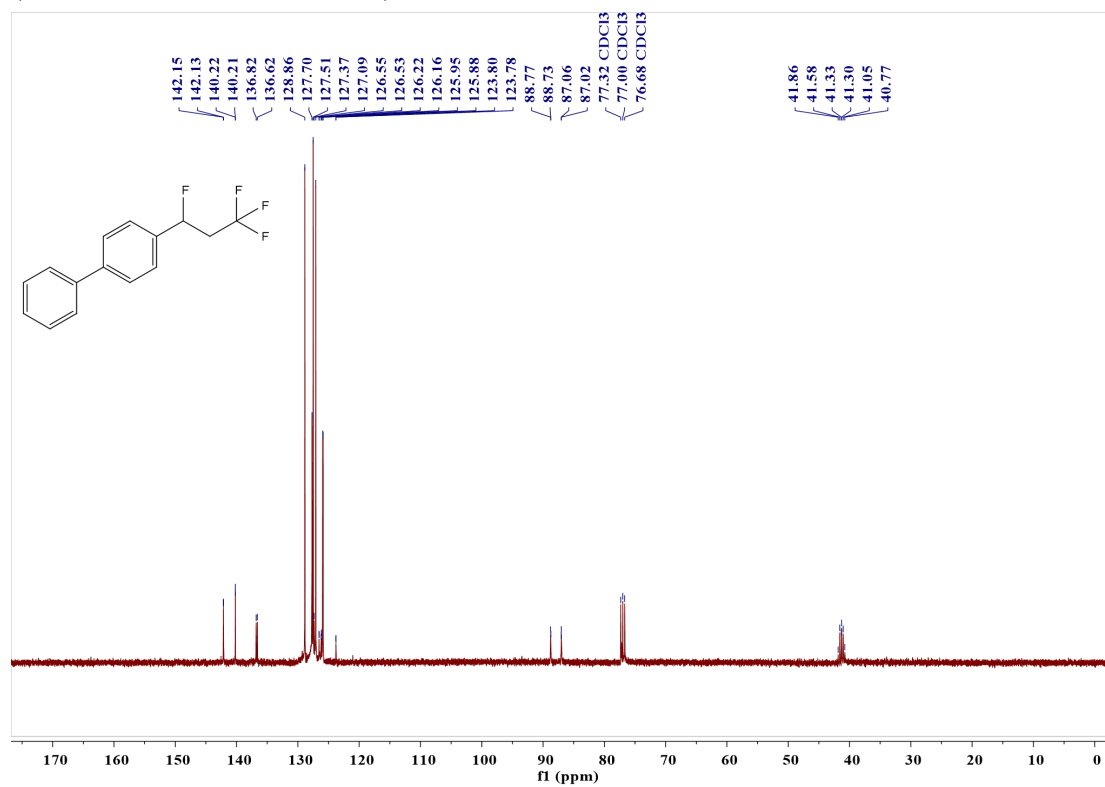



(<sup>19</sup>F NMR, CDCl<sub>3</sub>, 376 MHz)

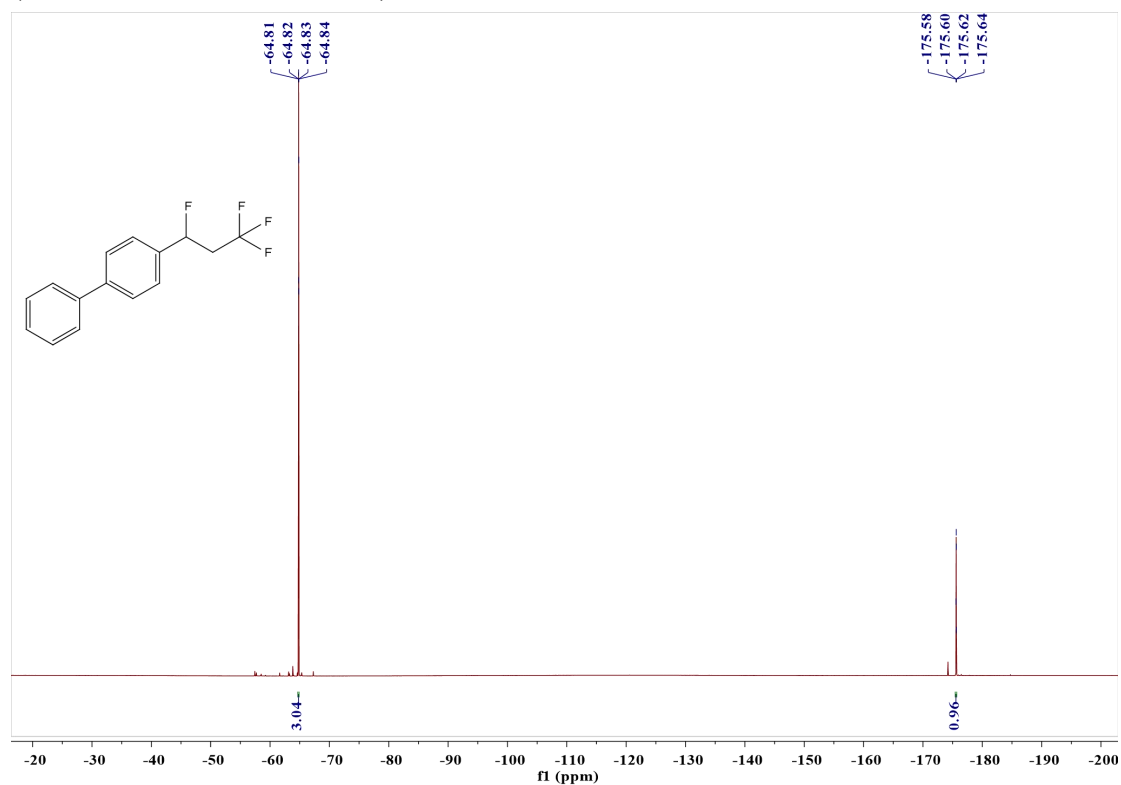

**3-(1,3,3,3-tetrafluoropropyl)benzaldehyde (2b)**

(<sup>1</sup>H NMR, DMSO-*d*<sub>6</sub>, 400 MHz)

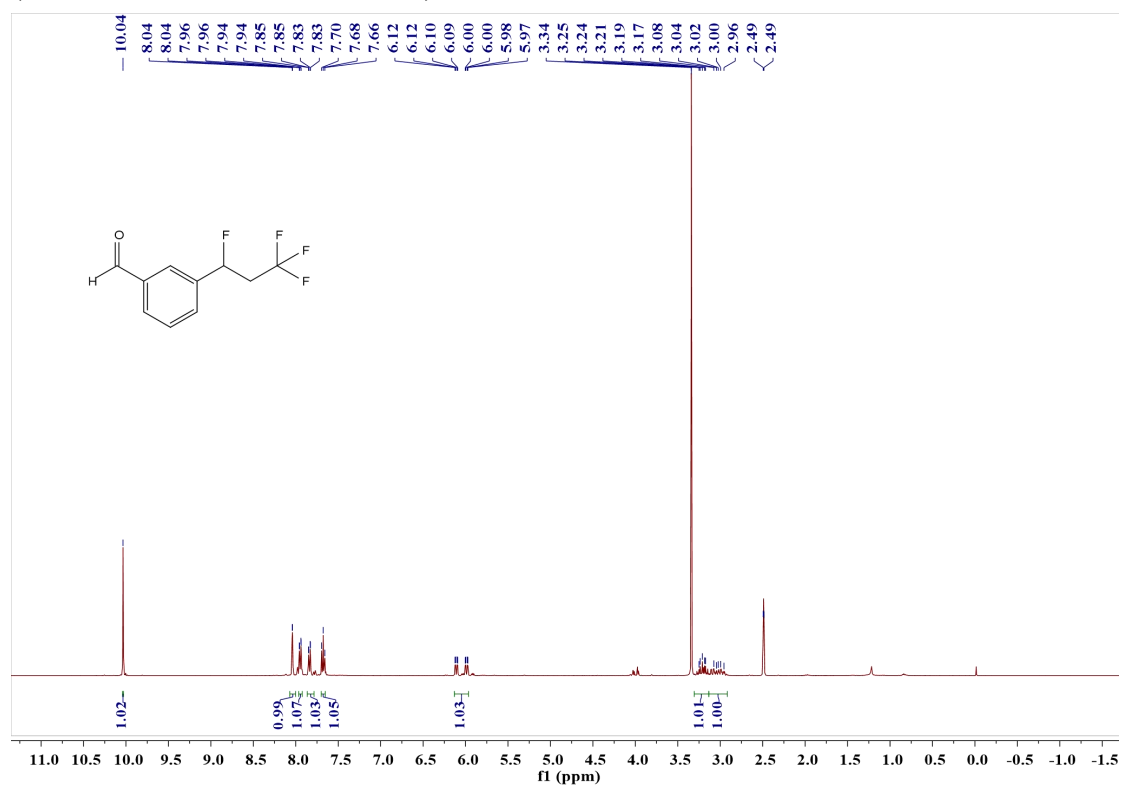

(<sup>13</sup>C NMR, DMSO-*d*<sub>6</sub>, 101 MHz)

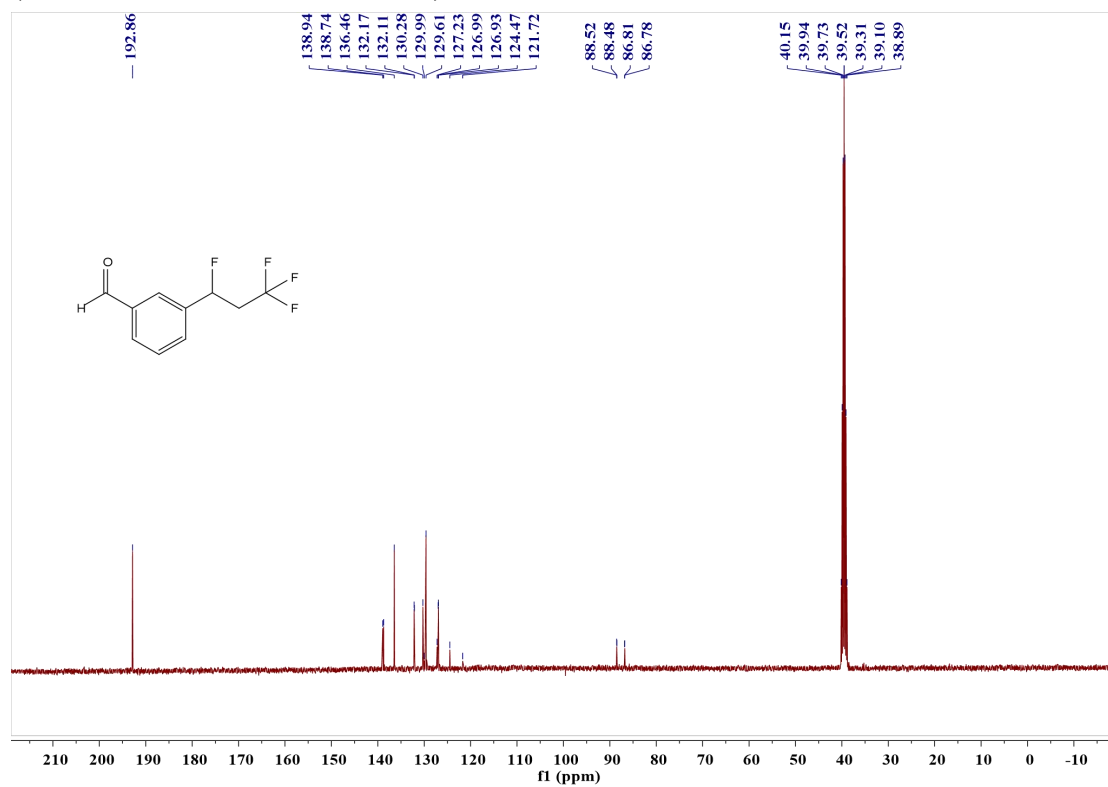

(<sup>19</sup>F NMR, DMSO-*d*<sub>6</sub>, 376 MHz)

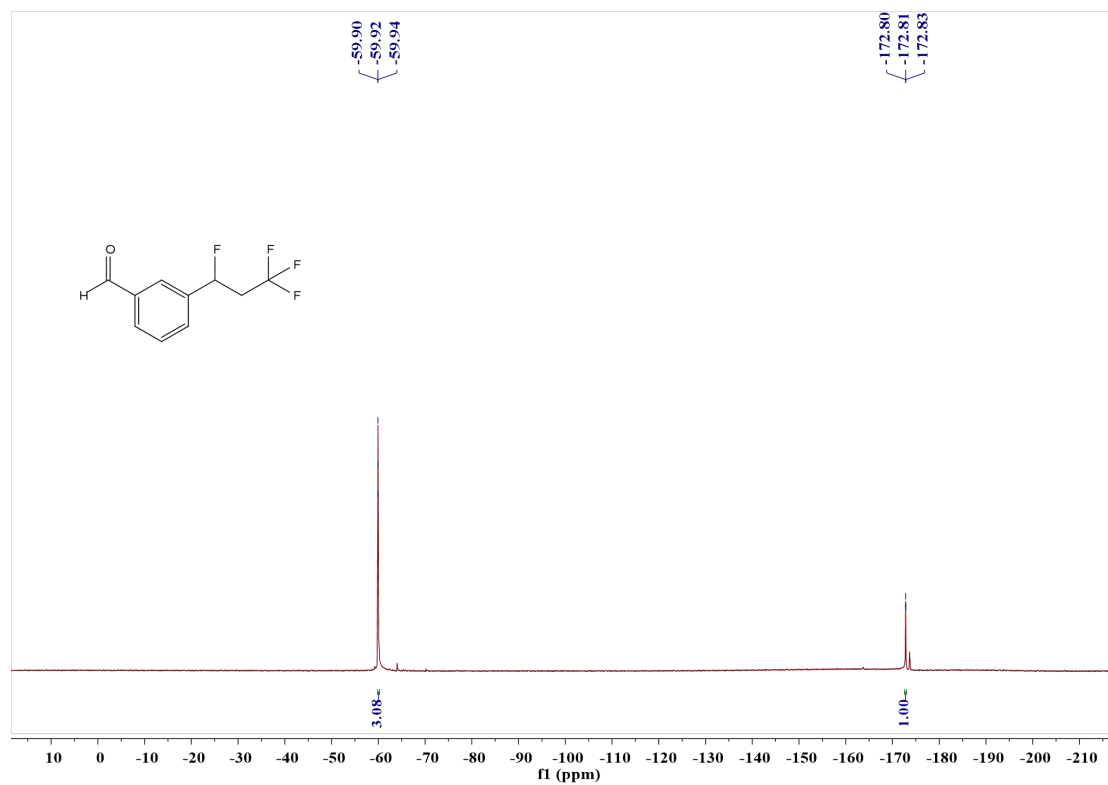

# methyl 4-(1,3,3,3-tetrafluoropropyl)benzoate (2c)

(<sup>1</sup>H NMR, CDCl<sub>3</sub>, 400 MHz)

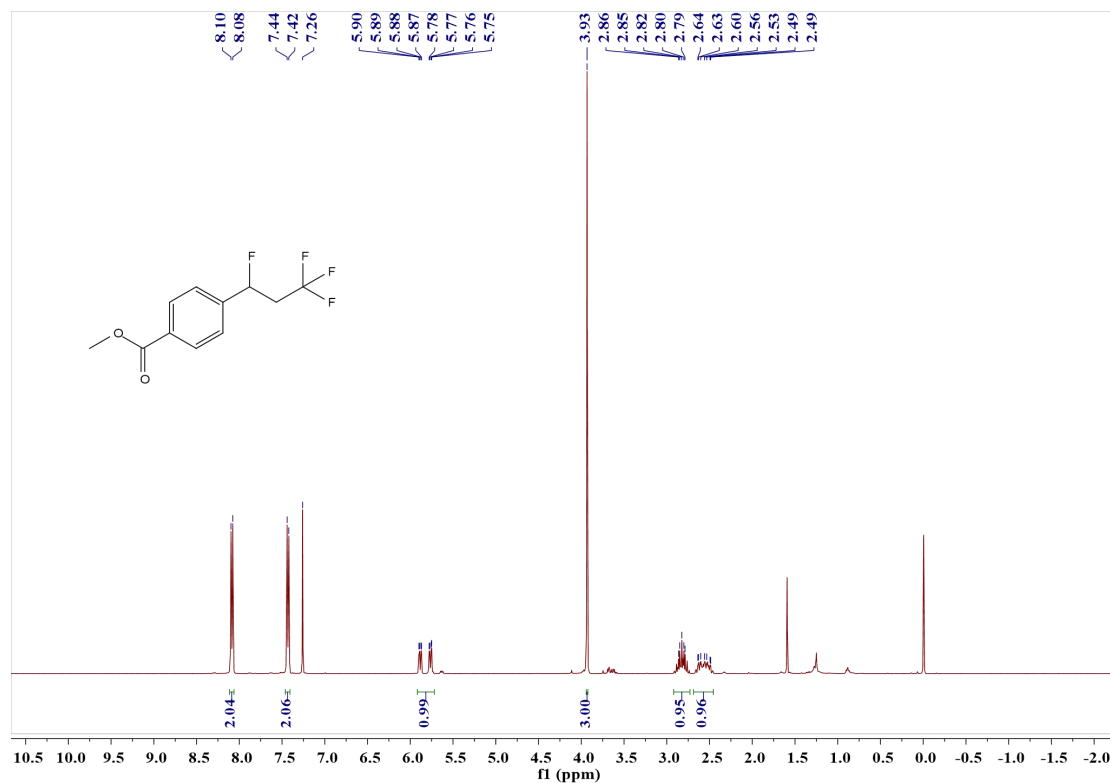

(<sup>13</sup>C NMR, CDCl<sub>3</sub>, 101 MHz)

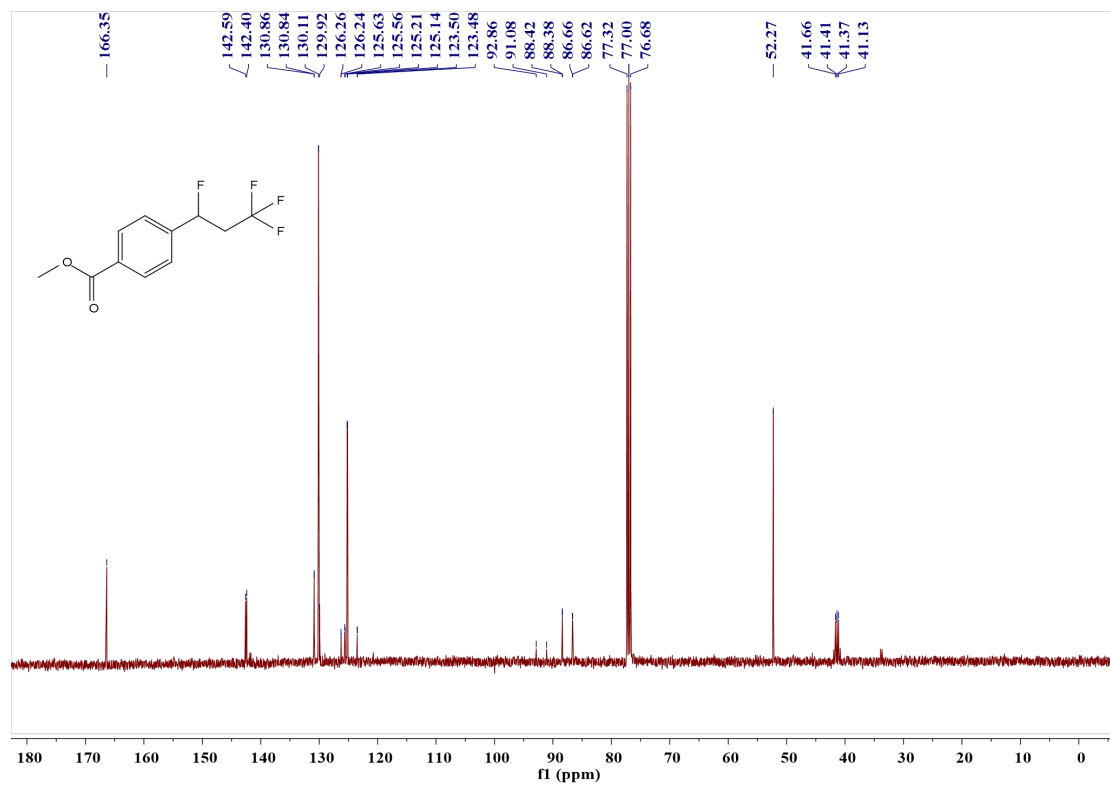

(<sup>19</sup>F NMR, CDCl<sub>3</sub>, 376 MHz)

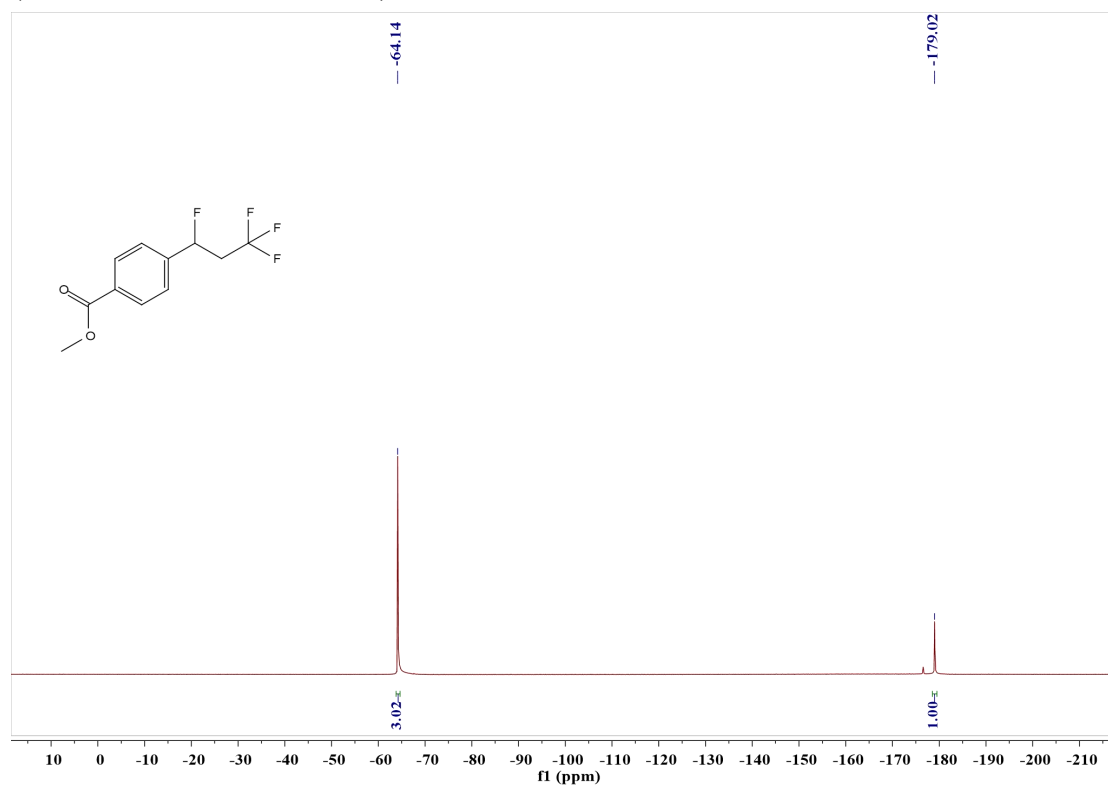

**4-Isobutyl-4'-(1,3,3,3-tetrafluoropropyl)-1,1'-biphenyl (2d)**

(<sup>1</sup>H NMR, CDCl<sub>3</sub>, 400 MHz)

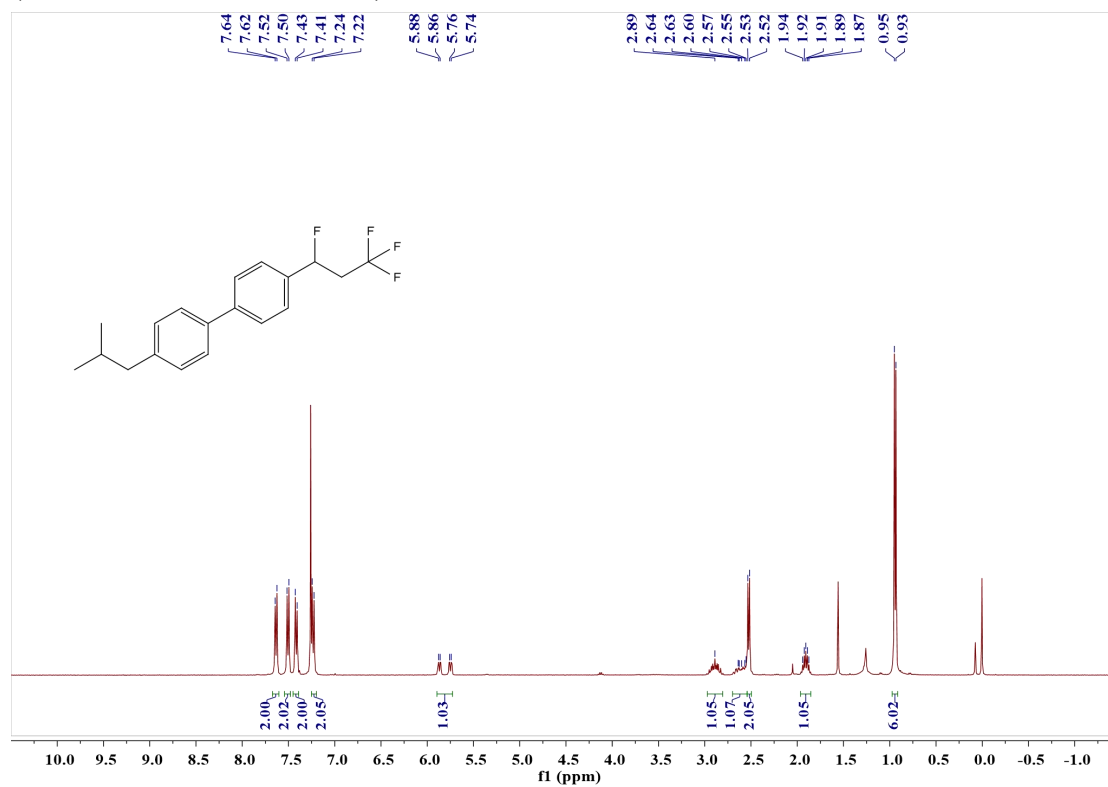

(<sup>13</sup>C NMR, CDCl<sub>3</sub>, 101 MHz)

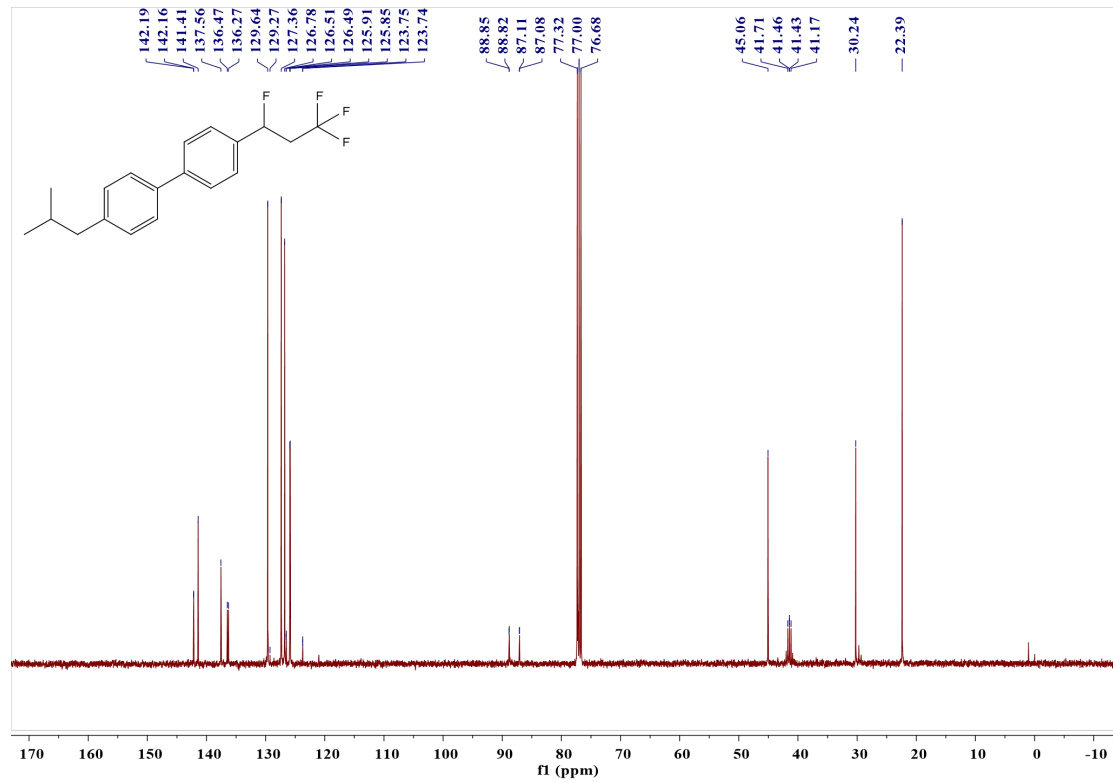

(<sup>19</sup>F NMR, CDCl<sub>3</sub>, 376 MHz)

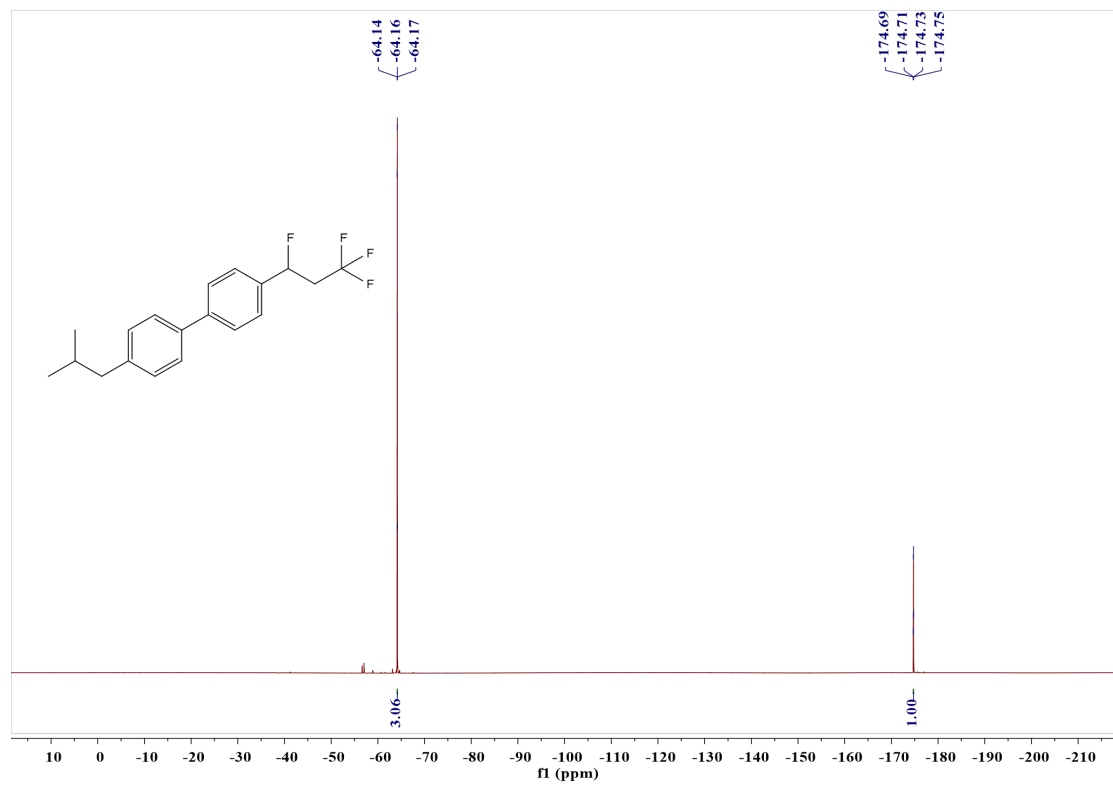

### 4-(Tert-butyl)-4'-(1,3,3,3-tetrafluoropropyl)-1,1'-biphenyl (2e)

(<sup>1</sup>H NMR, CDCl<sub>3</sub>, 400 MHz)

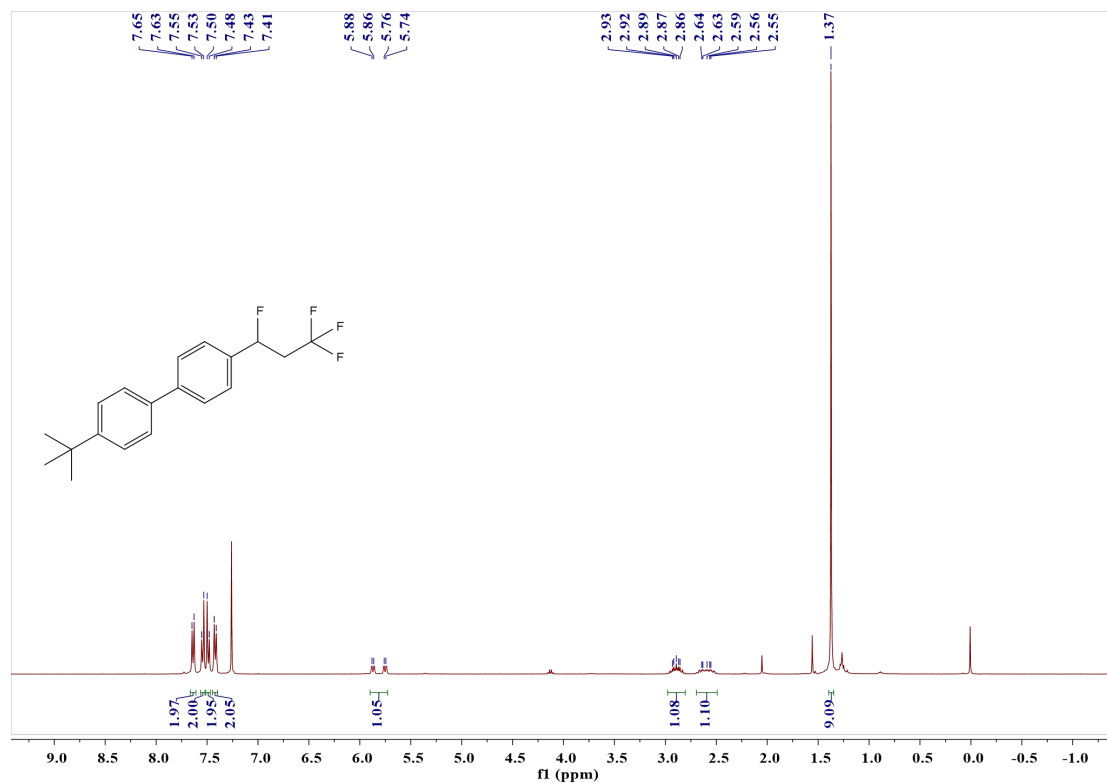

(<sup>13</sup>C NMR, CDCl<sub>3</sub>, 101 MHz)

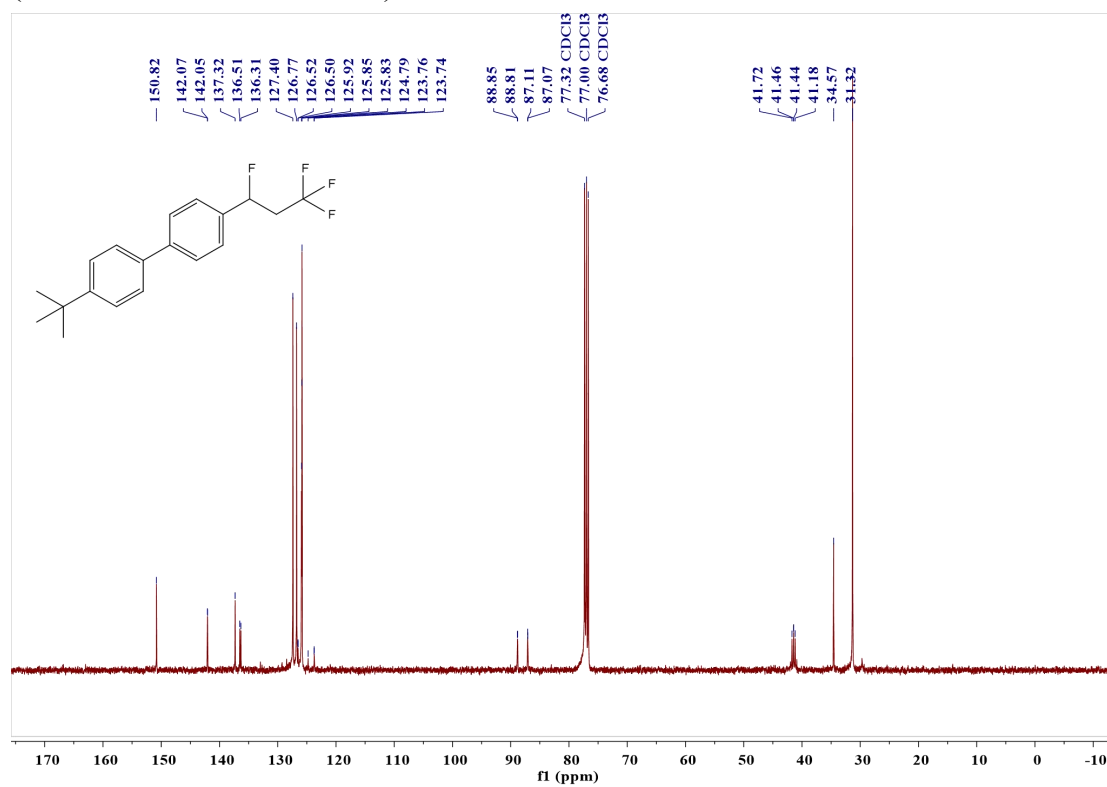

$^{19}\text{F}$  NMR,  $\text{CDCl}_3$ , 376 MHz

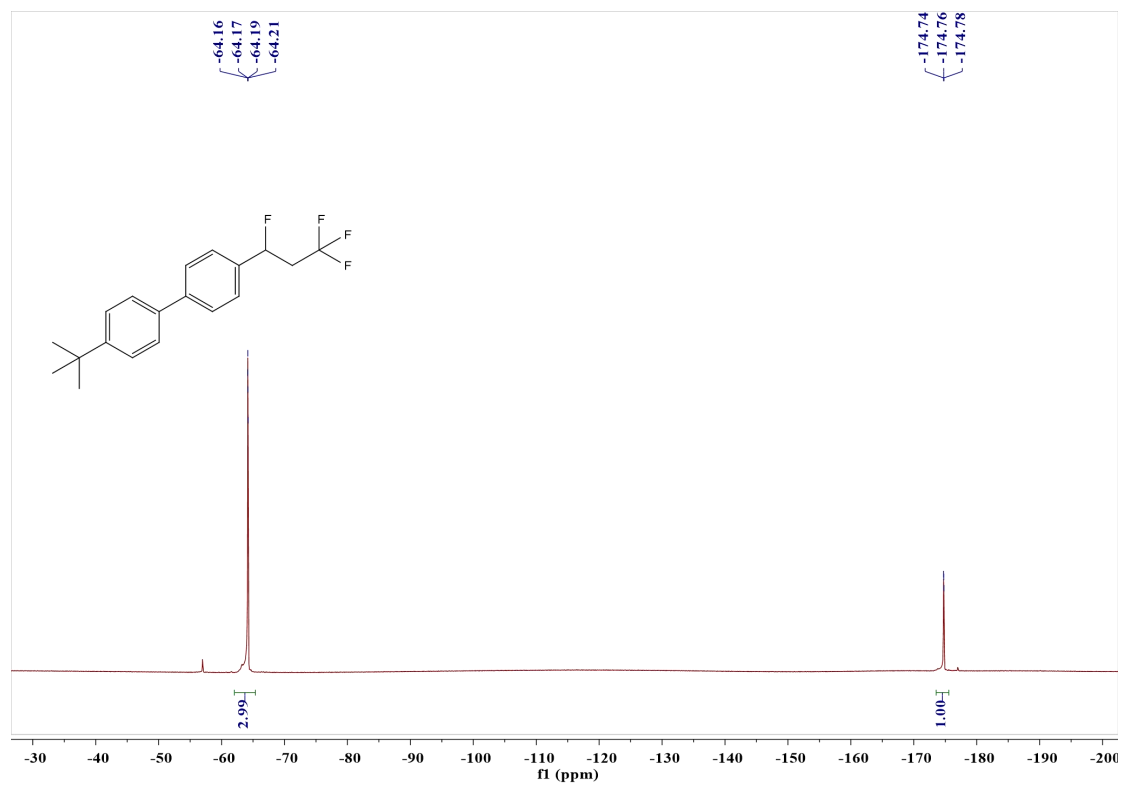

**3-(Tert-butyl)-4'-(1,3,3,3-tetrafluoropropyl)-1,1'-biphenyl (2f)**  
 $^1\text{H}$  NMR,  $\text{CDCl}_3$ , 400 MHz

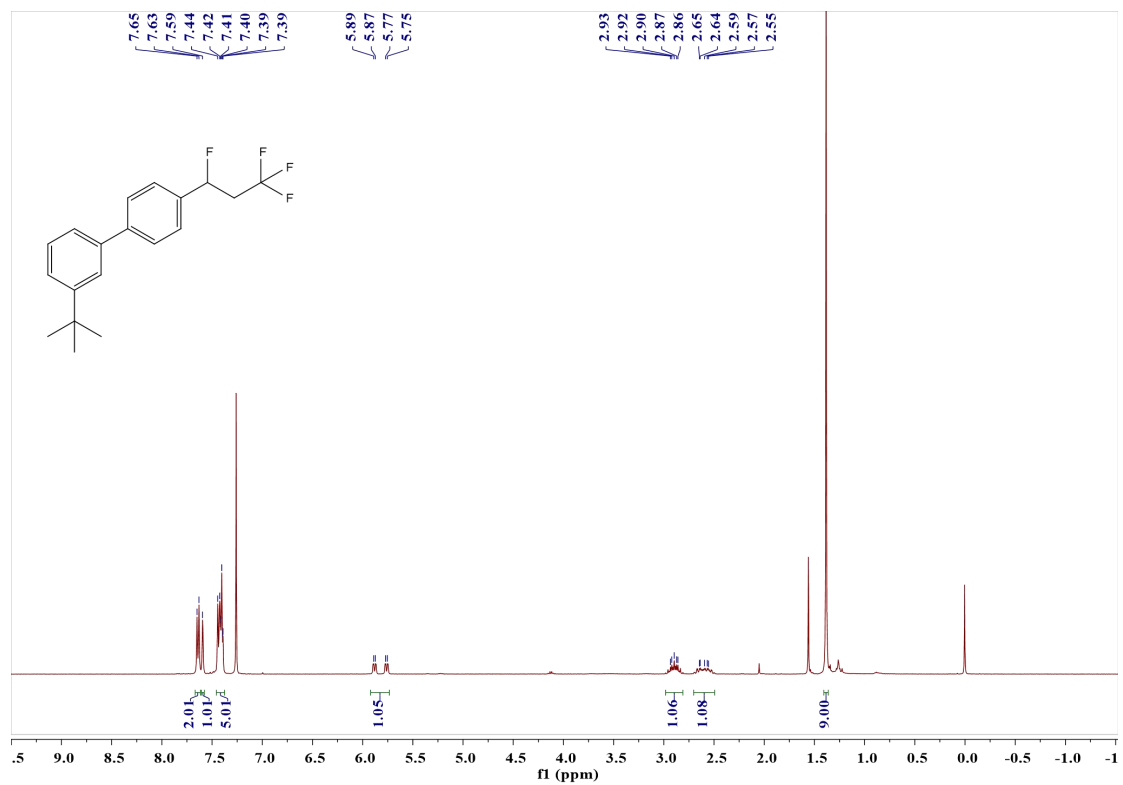

$^{13}\text{C}$  NMR,  $\text{CDCl}_3$ , 101 MHz

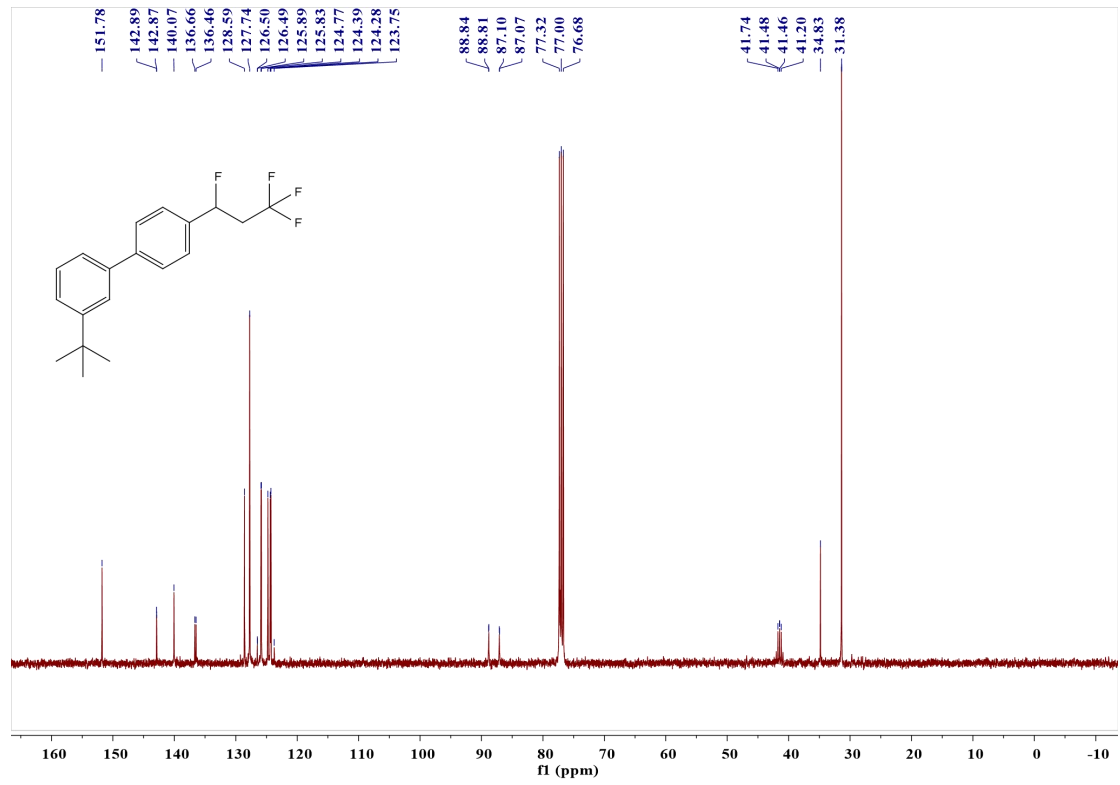

$^{19}\text{F}$  NMR,  $\text{CDCl}_3$ , 376 MHz

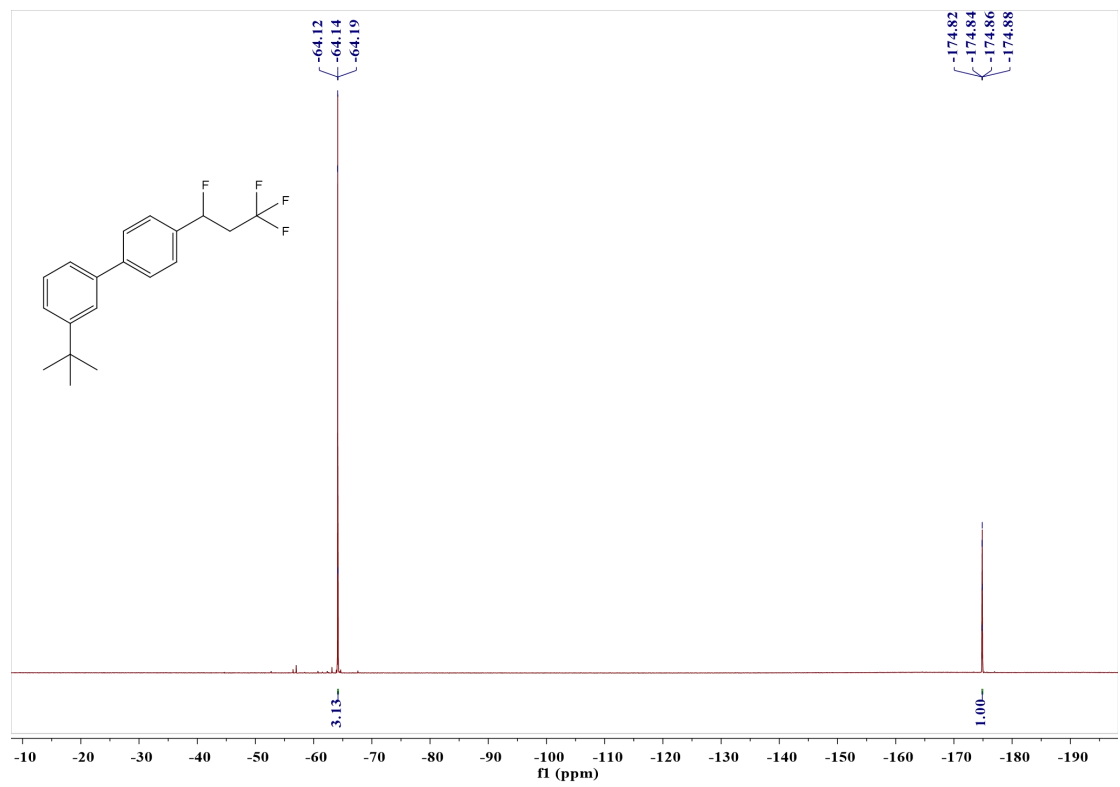



### 3,5-Di-tert-butyl-4'-(1,3,3,3-tetrafluoropropyl)-1,1'-biphenyl (2g)

(<sup>1</sup>H NMR, CDCl<sub>3</sub>, 400 MHz)

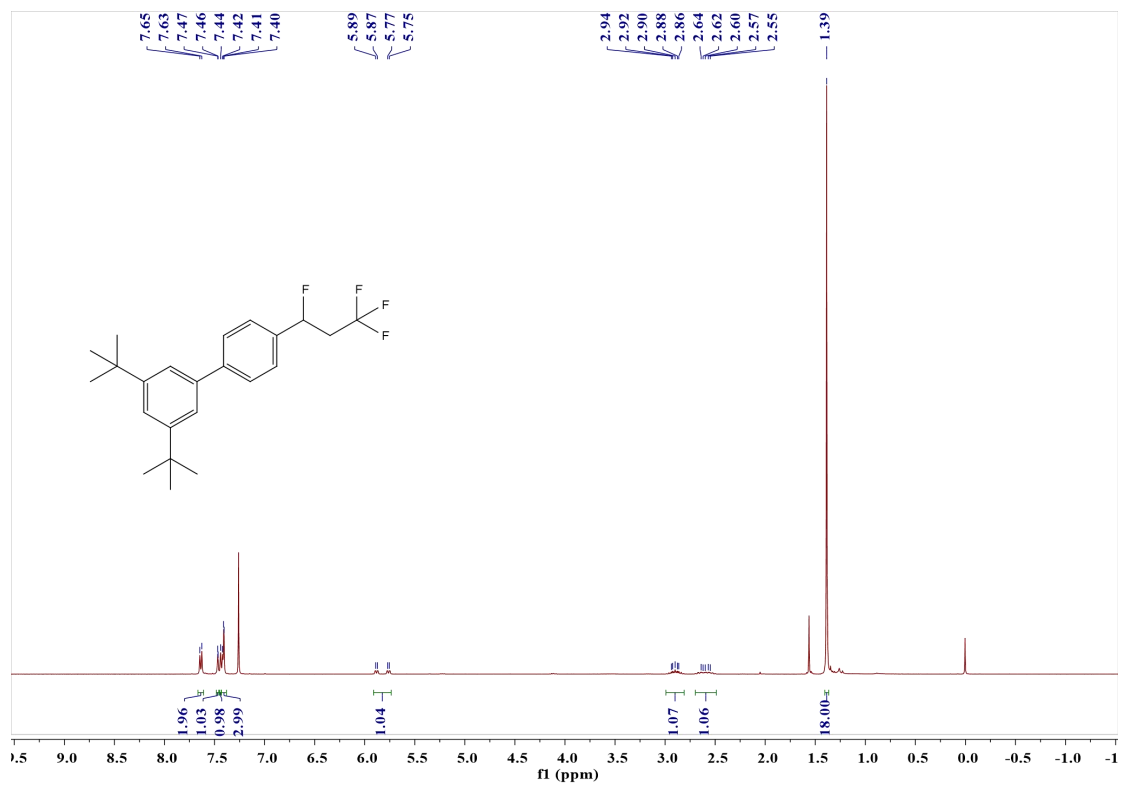

(<sup>13</sup>C NMR, CDCl<sub>3</sub>, 101 MHz)

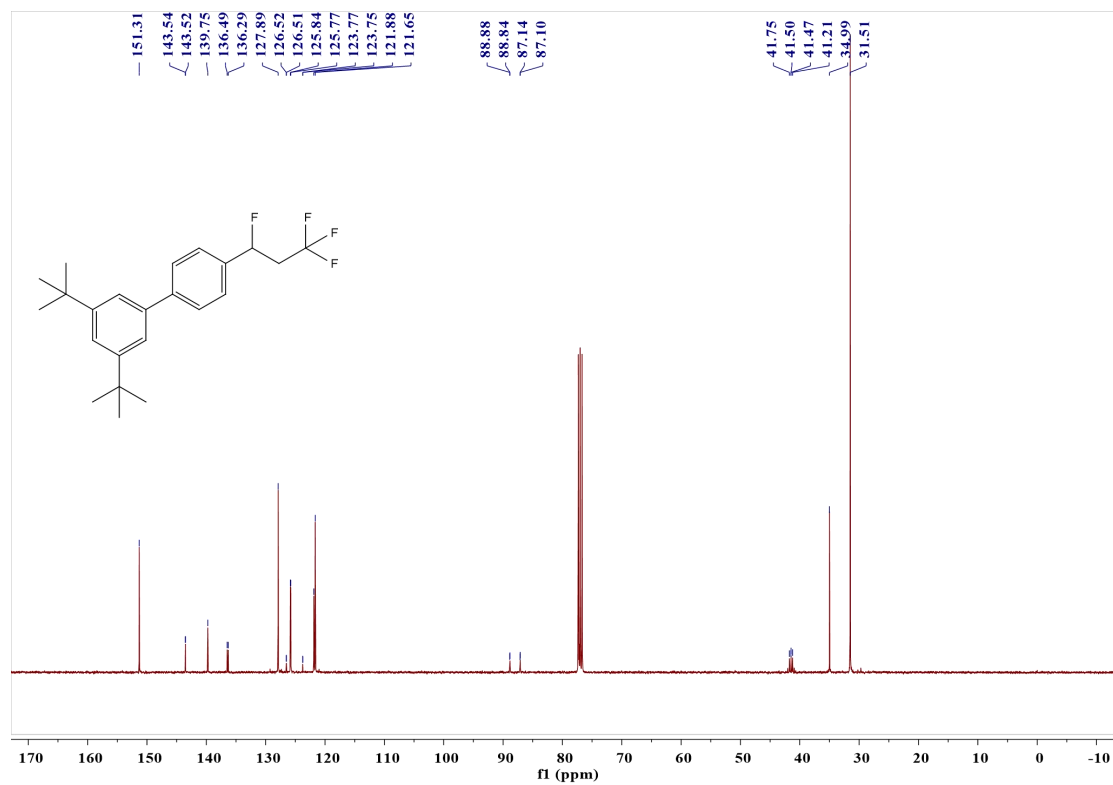

(<sup>19</sup>F NMR, CDCl<sub>3</sub>, 376 MHz)

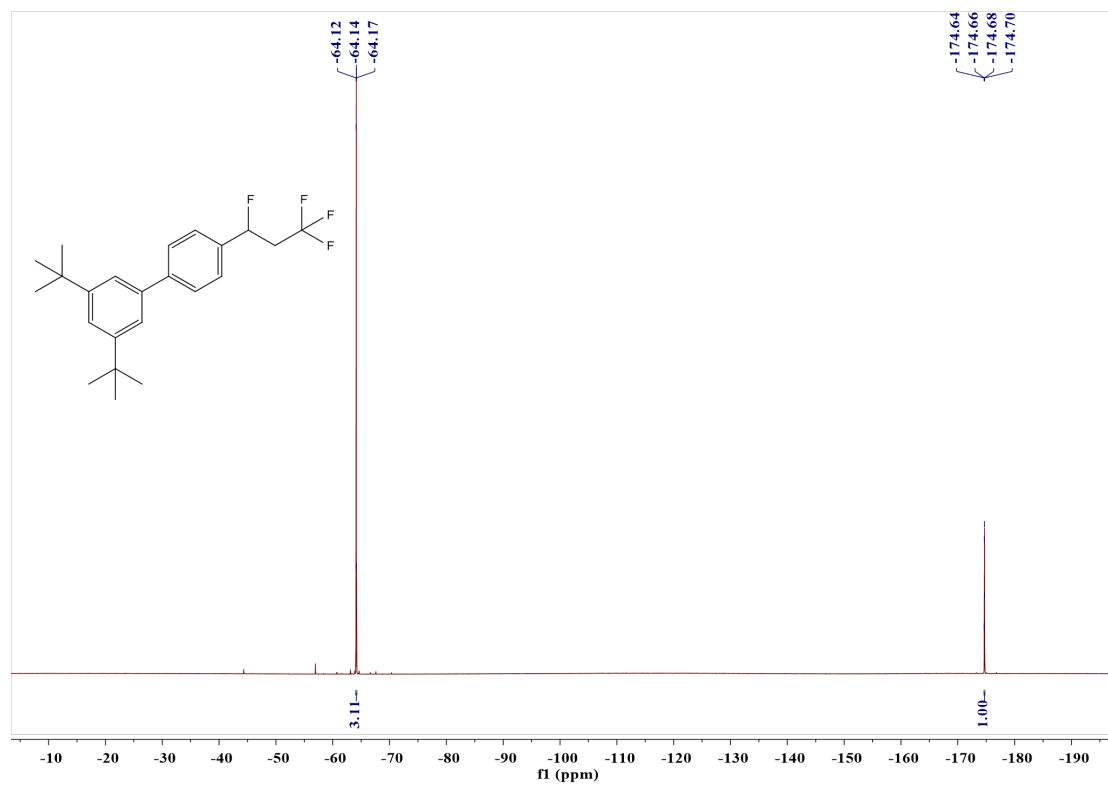

**Methyl 2-(4'-(1,3,3,3-tetrafluoropropyl)-[1,1'-biphenyl]-4-yl)acetate (2h)**  
(<sup>1</sup>H NMR, CDCl<sub>3</sub>, 400 MHz)

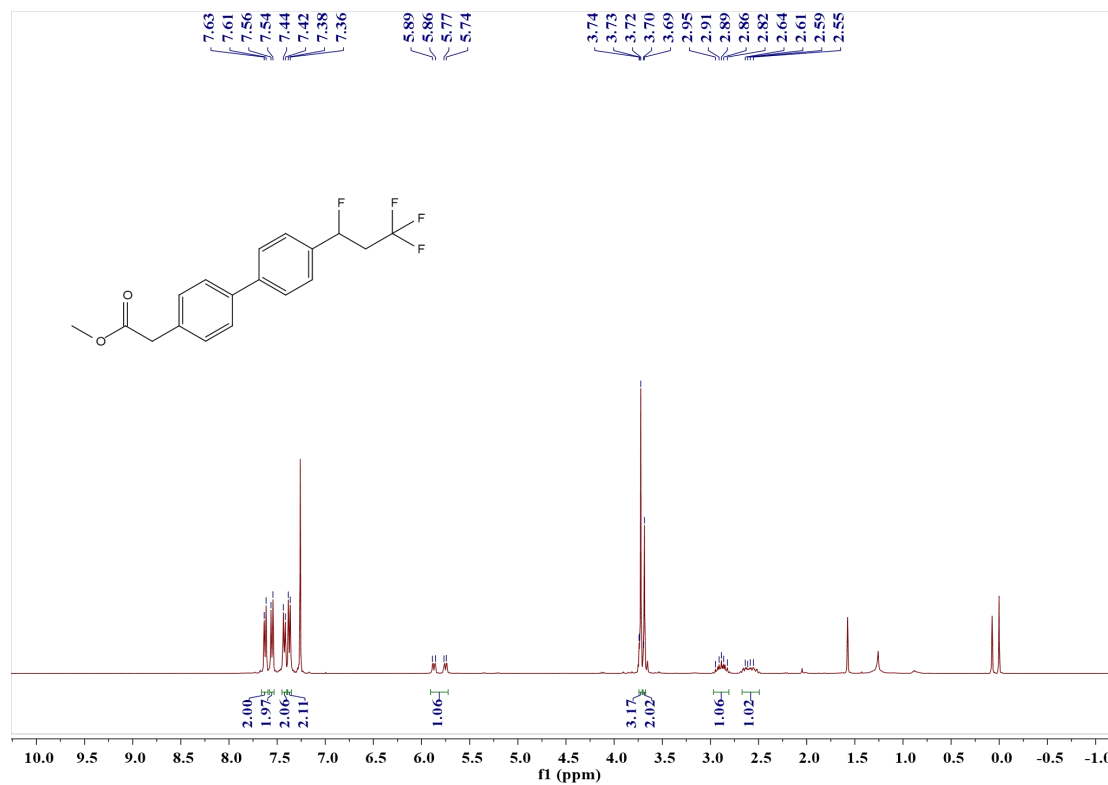

(<sup>13</sup>C NMR, CDCl<sub>3</sub>, 101 MHz)

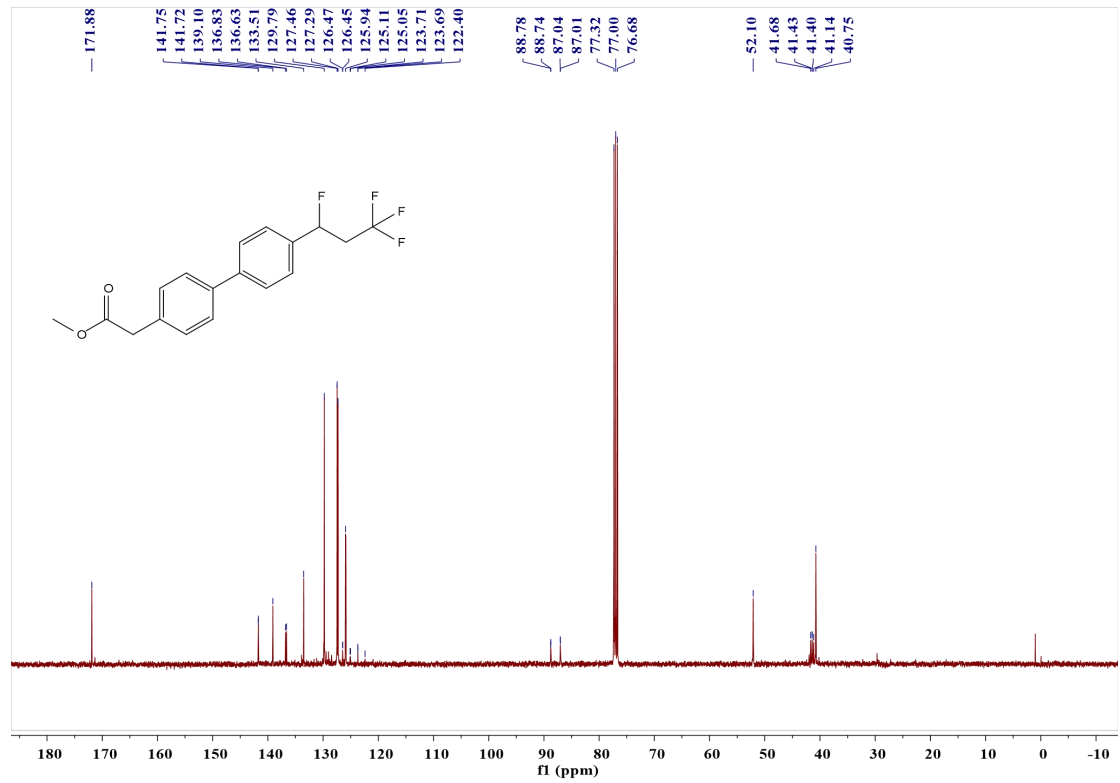

(<sup>19</sup>F NMR, CDCl<sub>3</sub>, 376 MHz)

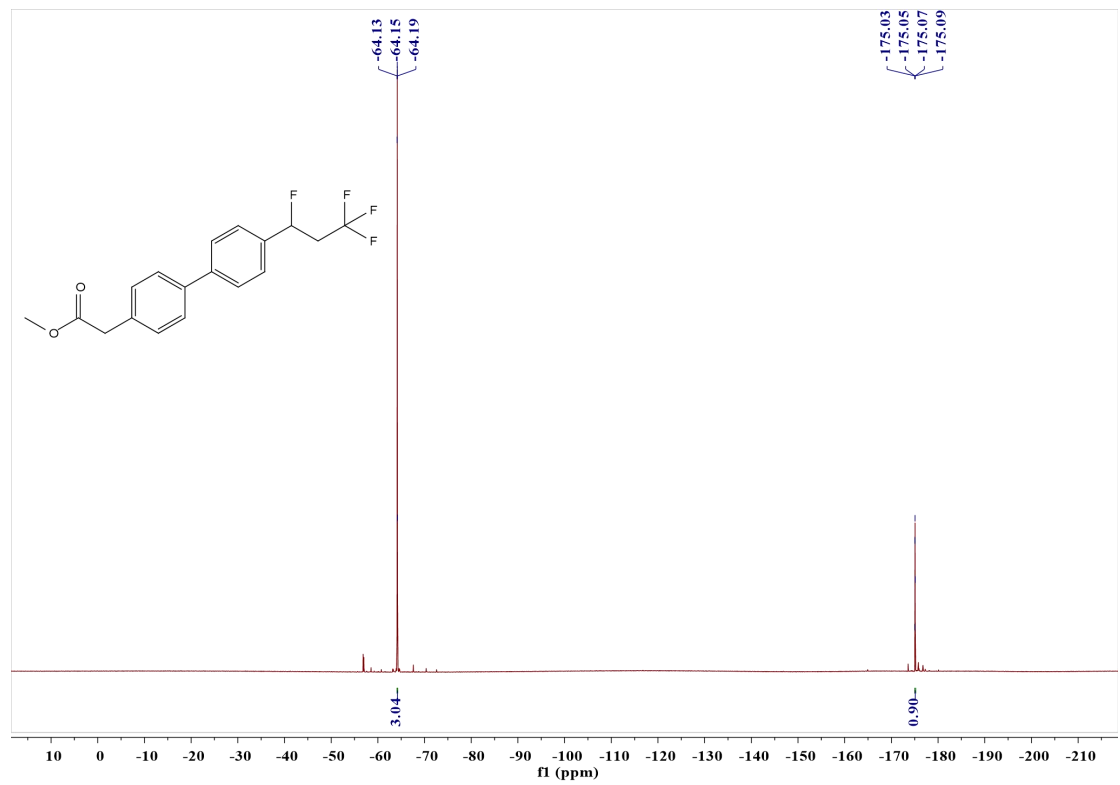

**Trimethyl(4'-(1,3,3,3-tetrafluoropropyl)-[1,1'-biphenyl]-4-yl)silane (2i)**  
(<sup>1</sup>H NMR, CDCl<sub>3</sub>, 400 MHz)

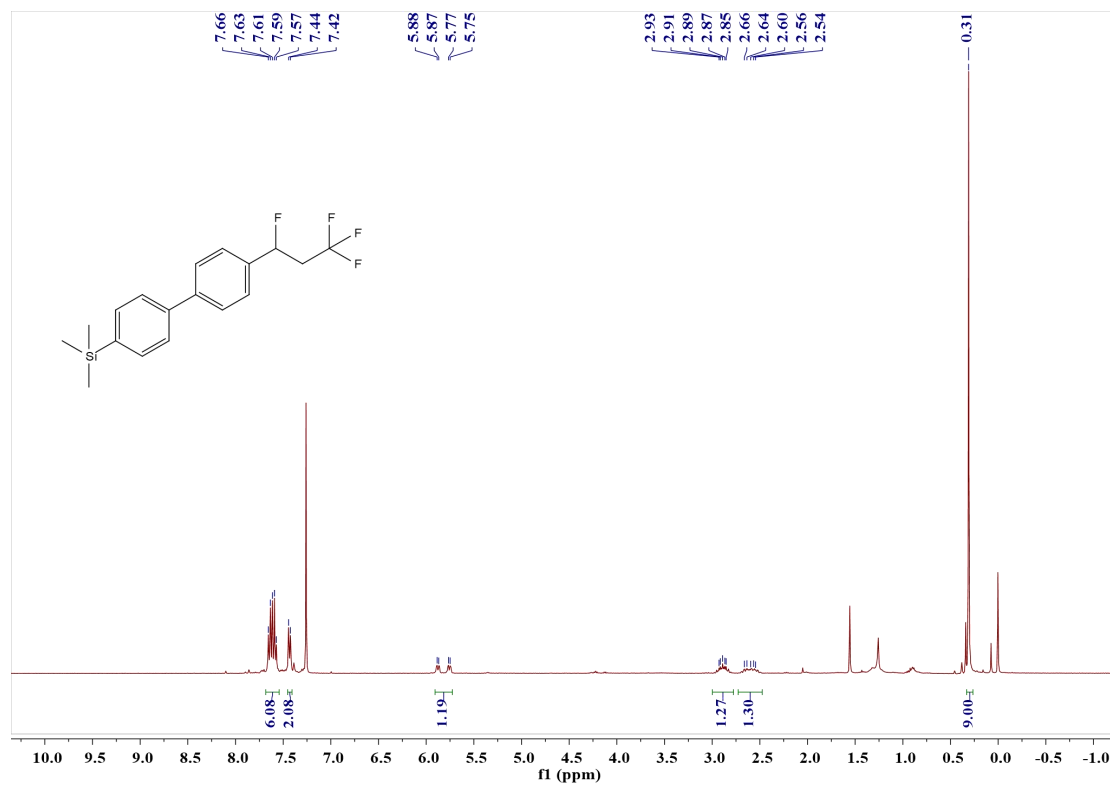

(<sup>13</sup>C NMR, CDCl<sub>3</sub>, 101 MHz)

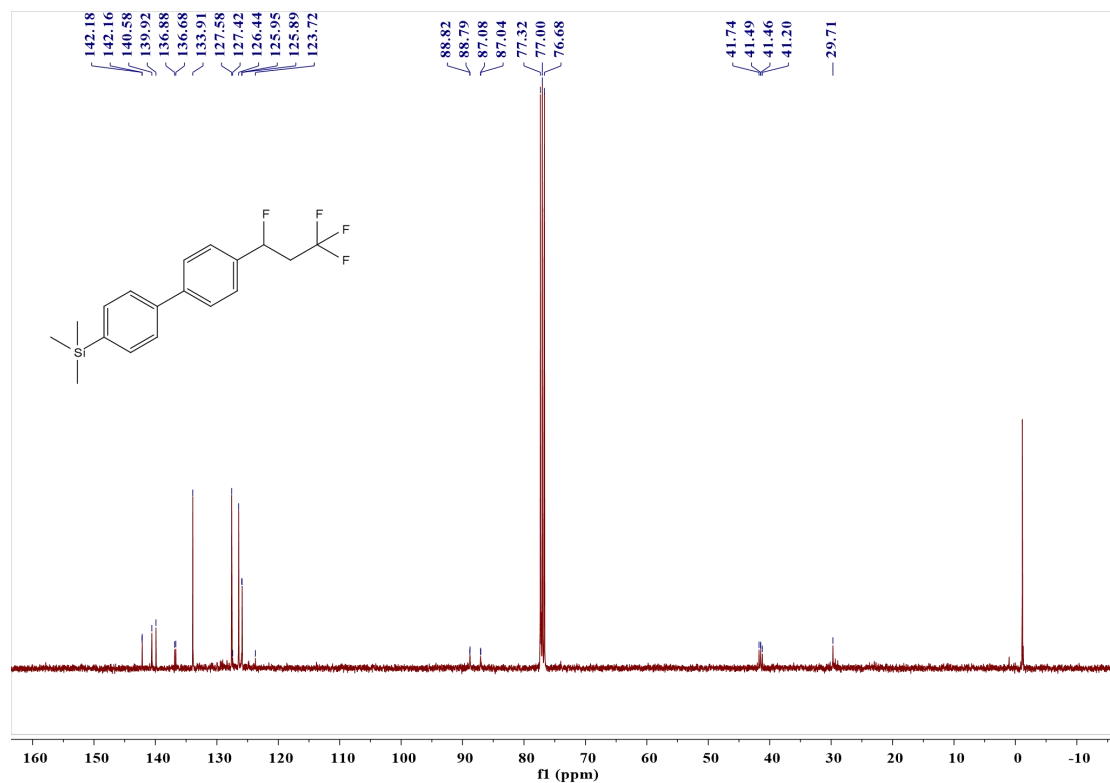

$^{19}\text{F}$  NMR,  $\text{CDCl}_3$ , 376 MHz

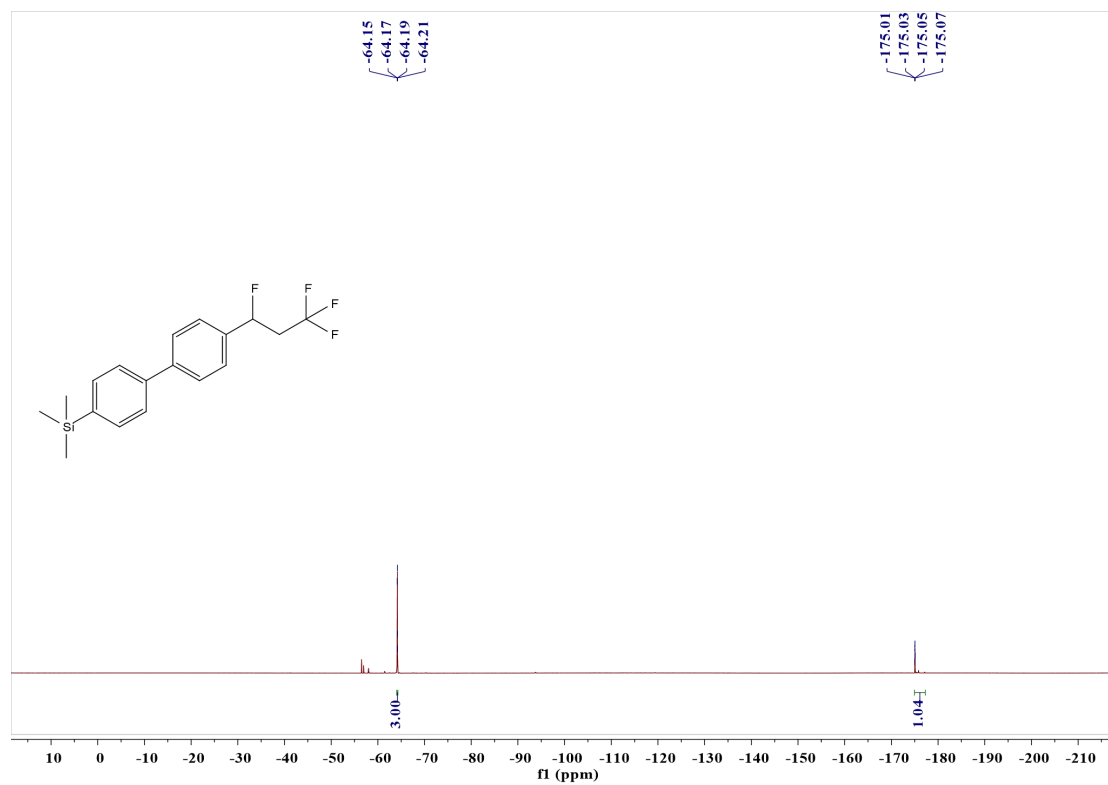

**2-Fluoro-4'-(1,3,3,3-tetrafluoropropyl)-1,1'-biphenyl (2j)**  
 $^1\text{H}$  NMR,  $\text{CDCl}_3$ , 400 MHz

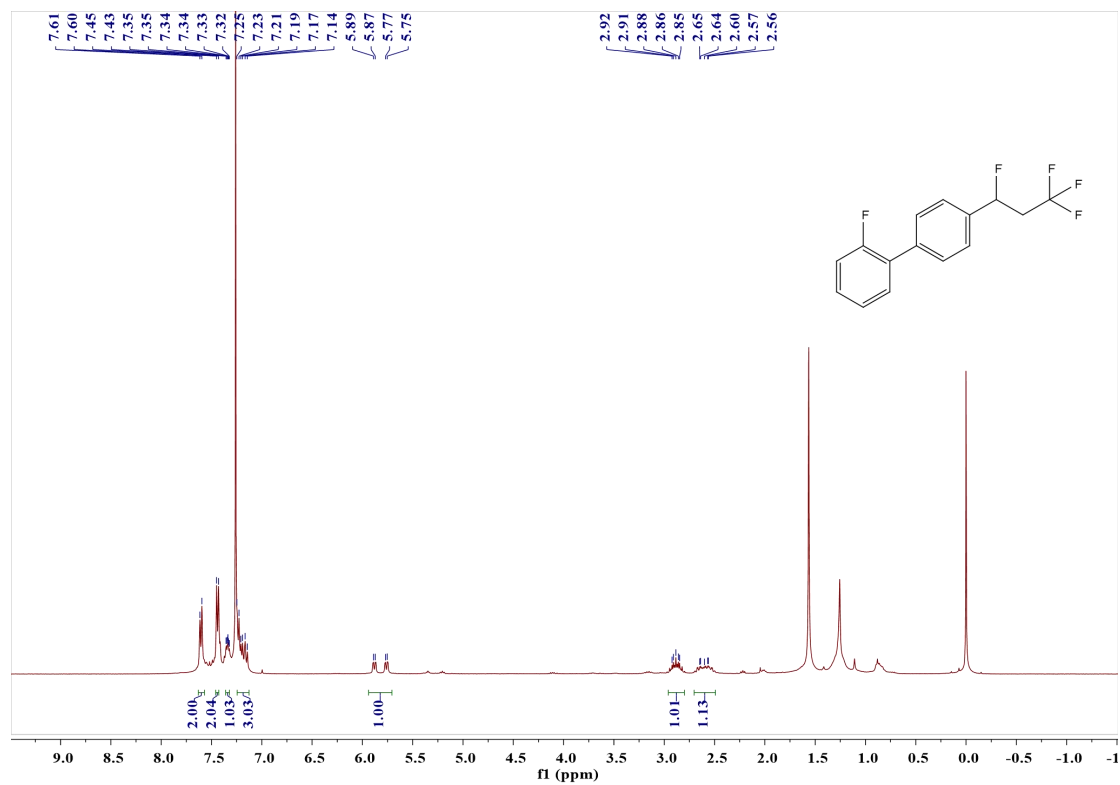

$^{13}\text{C}$  NMR,  $\text{CDCl}_3$ , 101 MHz

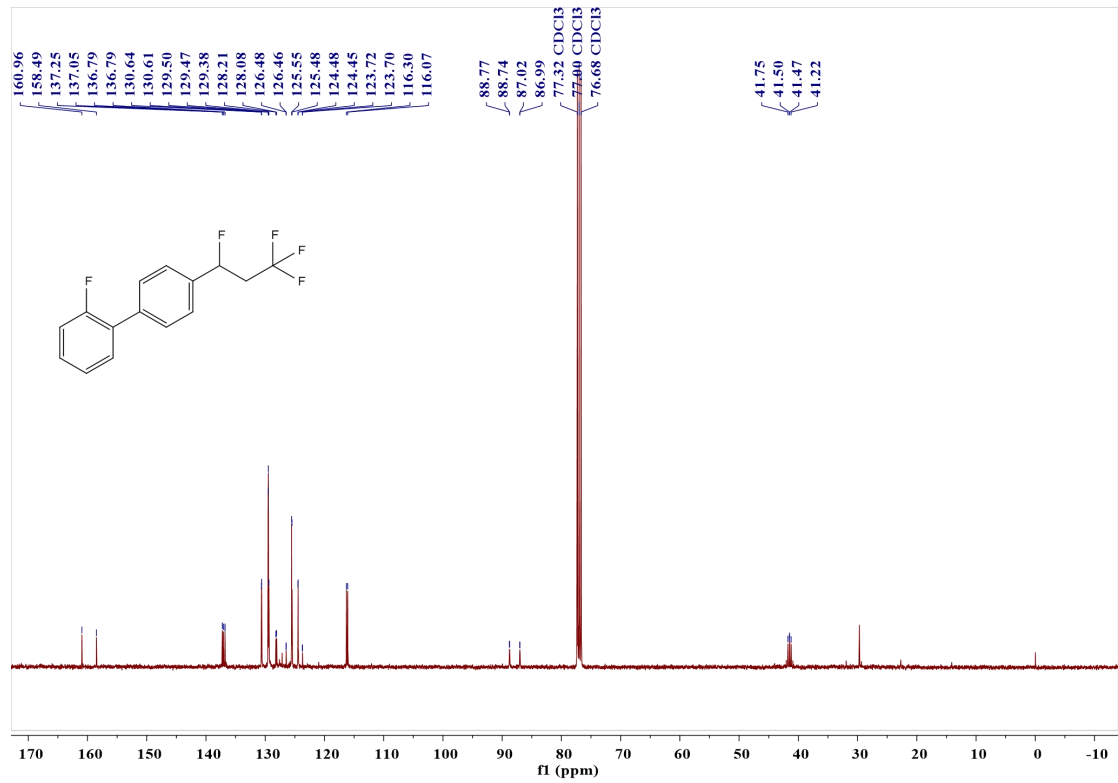

$^{19}\text{F}$  NMR,  $\text{CDCl}_3$ , 376 MHz

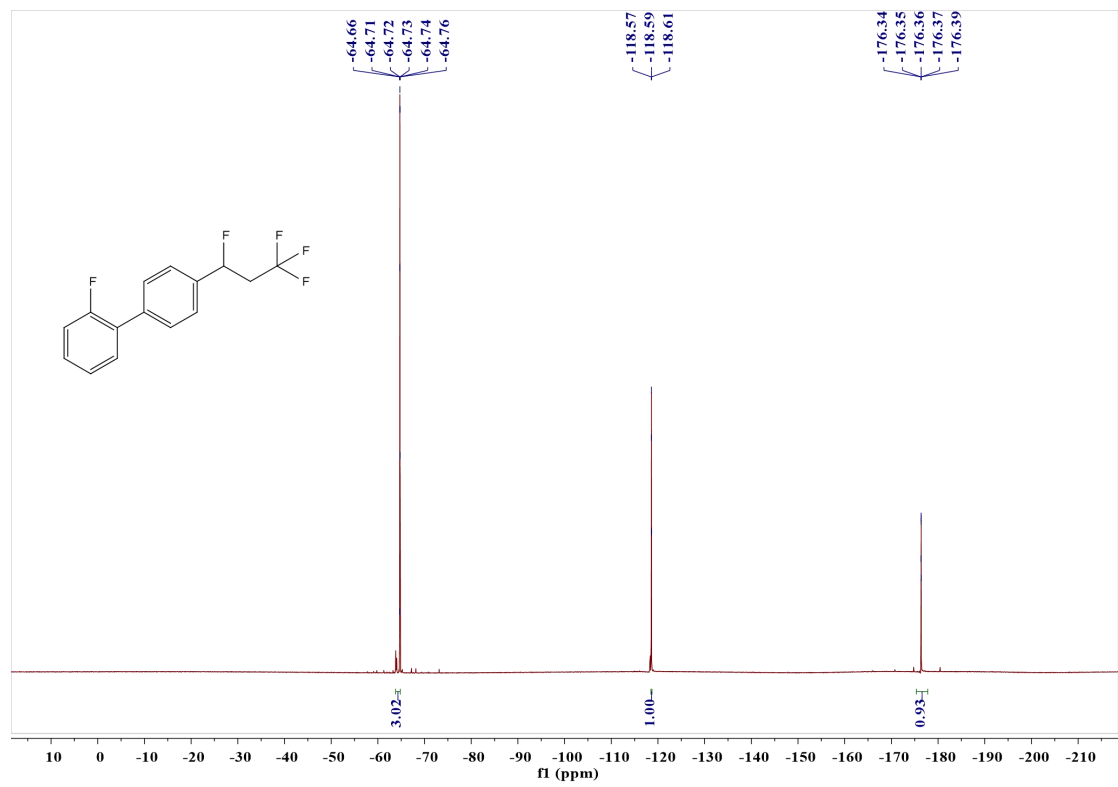

### 3-Fluoro-4'-(1,3,3,3-tetrafluoropropyl)-1,1'-biphenyl (2k)

(<sup>1</sup>H NMR, CDCl<sub>3</sub>, 400 MHz)

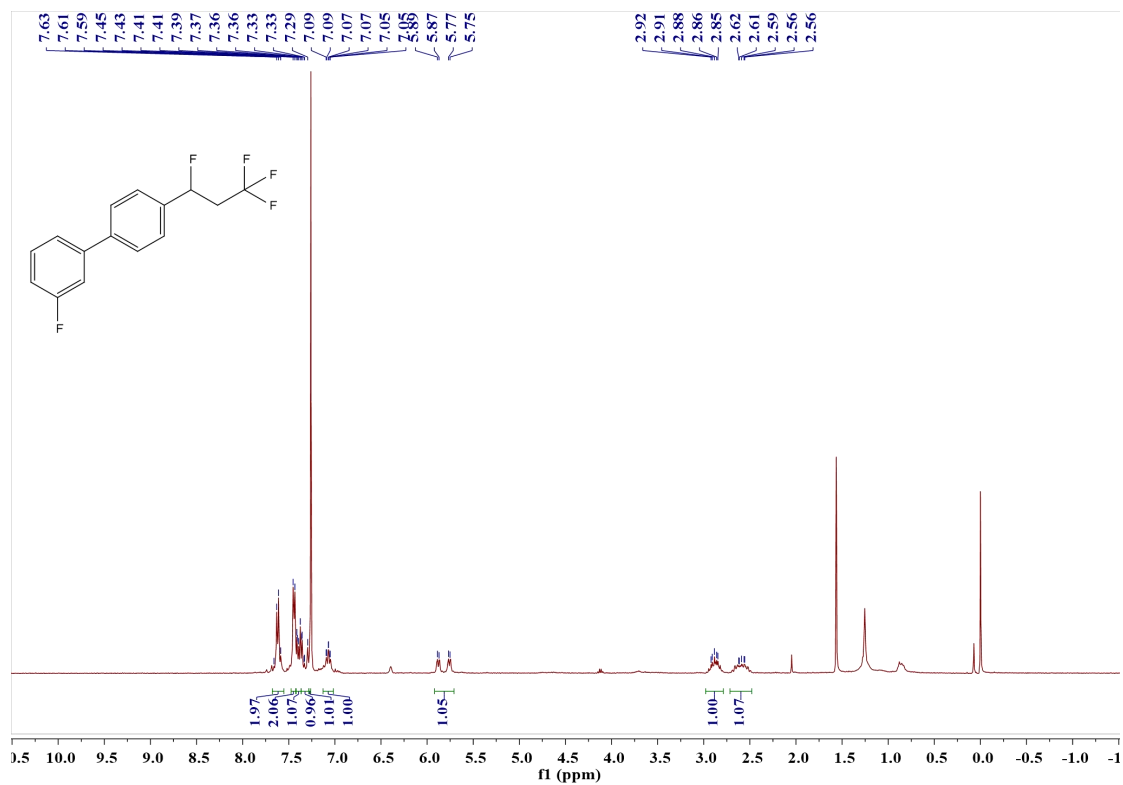

(<sup>13</sup>C NMR, CDCl<sub>3</sub>, 101 MHz)

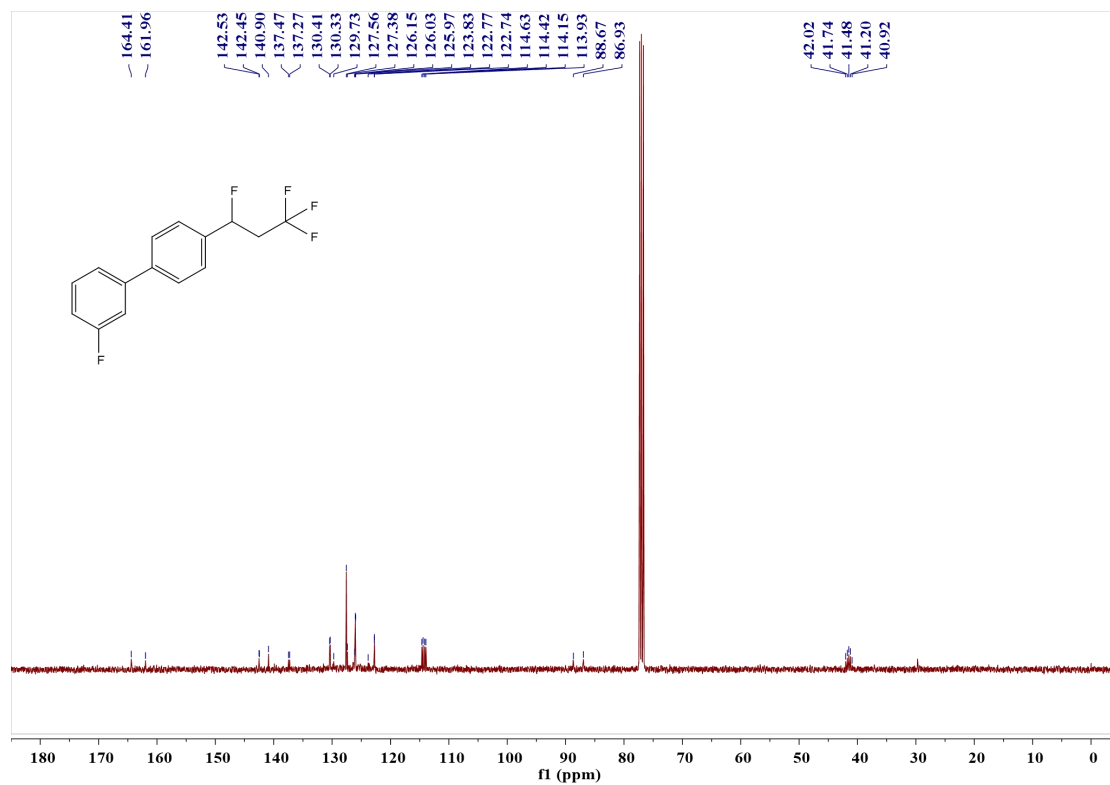

(<sup>19</sup>F NMR, CDCl<sub>3</sub>, 376 MHz)

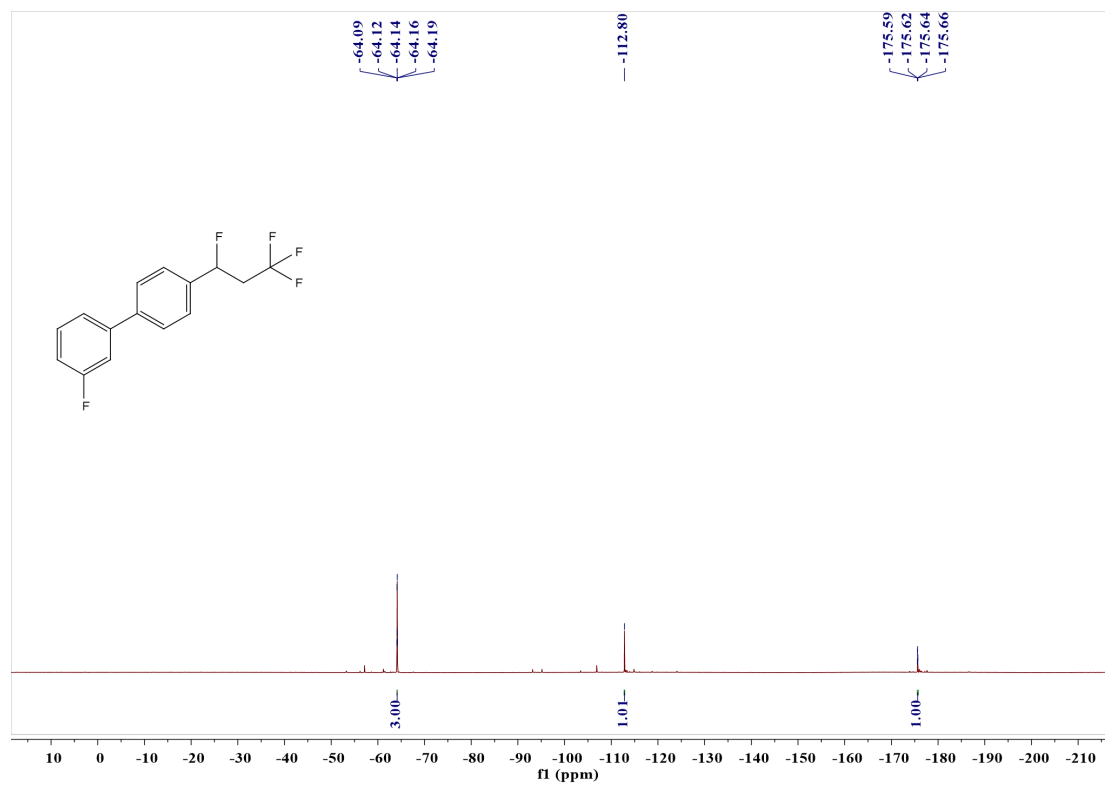

4-Fluoro-4'-(1,3,3,3-tetrafluoropropyl)-1,1'-biphenyl (2l)

(<sup>1</sup>H NMR, CDCl<sub>3</sub>, 400 MHz)

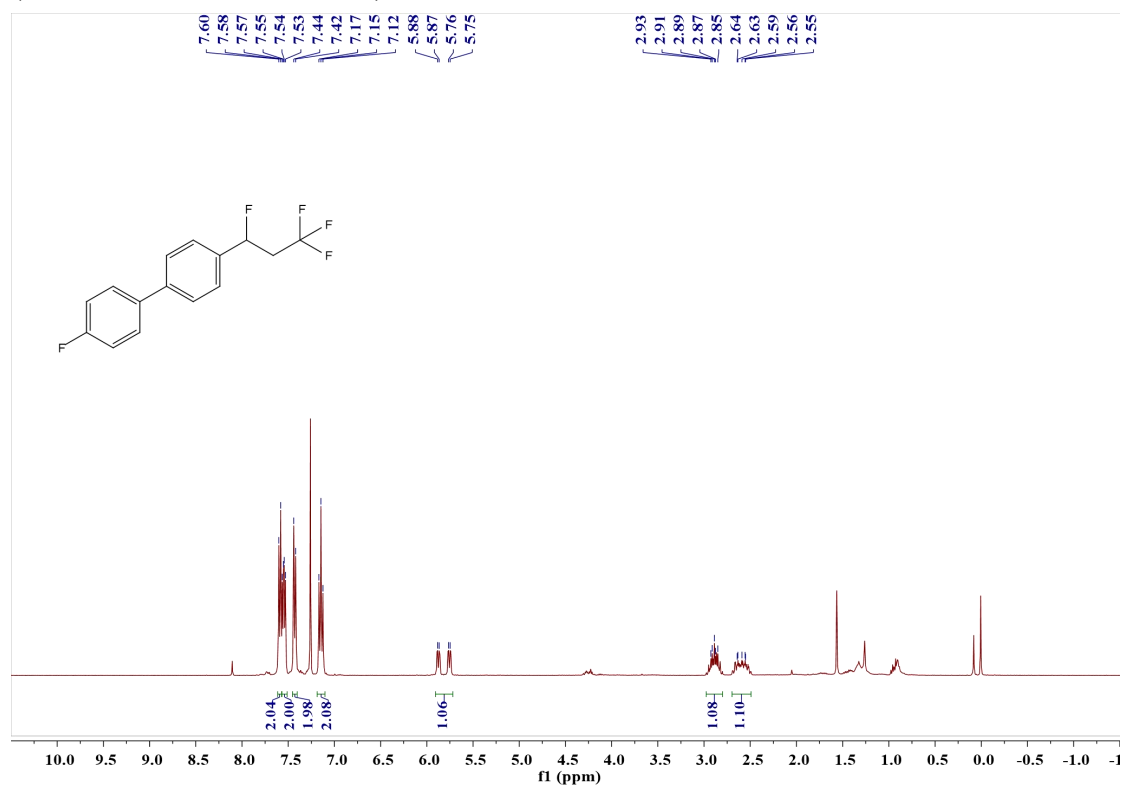



$^{13}\text{C}$  NMR,  $\text{CDCl}_3$ , 101 MHz

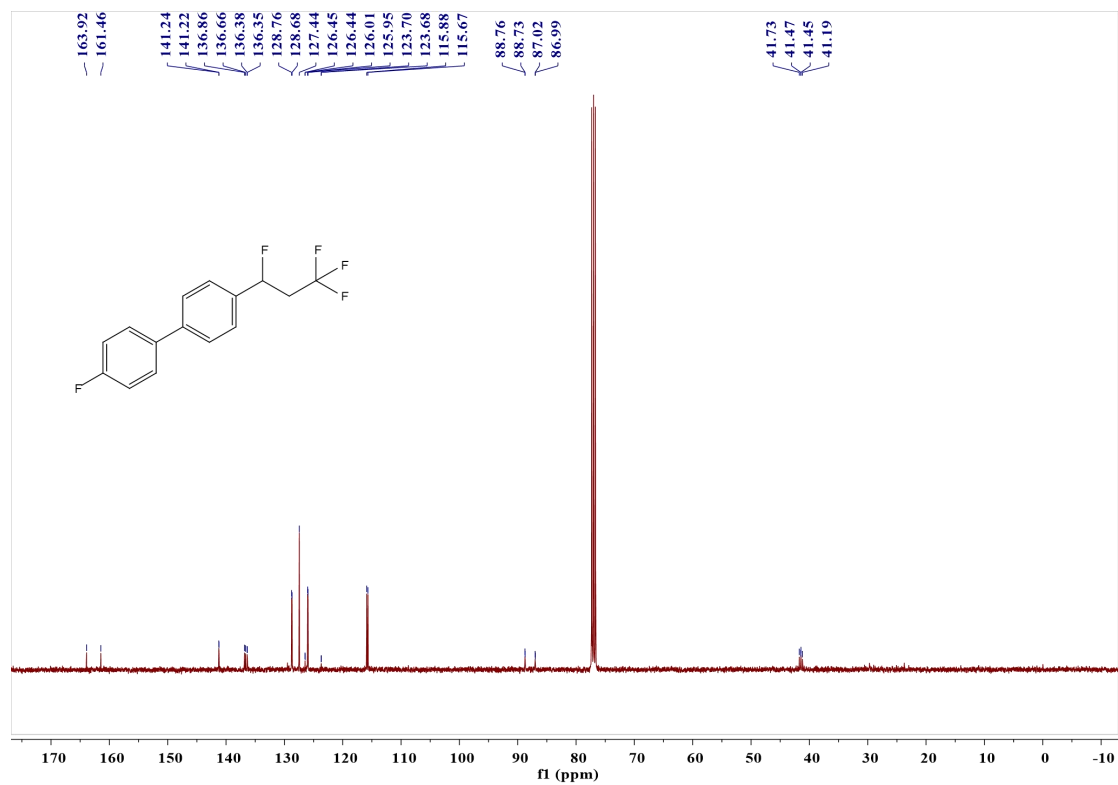

$^{19}\text{F}$  NMR,  $\text{CDCl}_3$ , 376 MHz

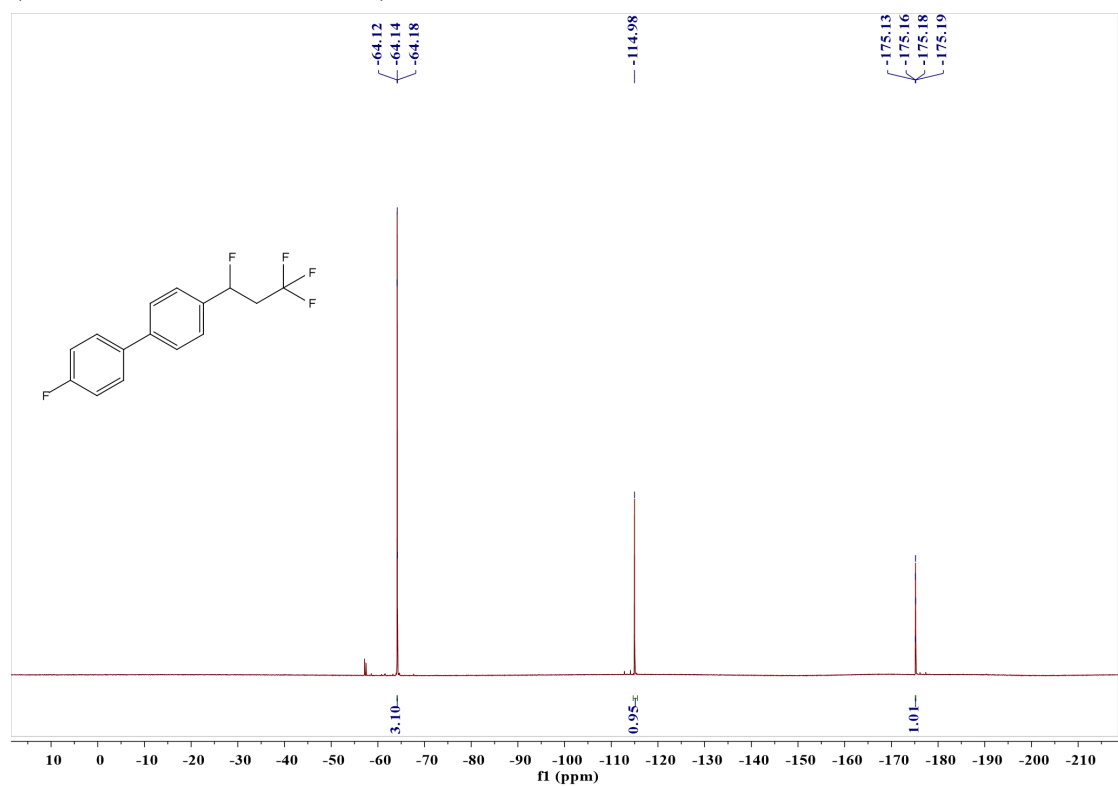

### 4'-(1,3,3,3-Tetrafluoropropyl)-3-(trifluoromethyl)-1,1'-biphenyl (2m)

(<sup>1</sup>H NMR, CDCl<sub>3</sub>, 400 MHz)

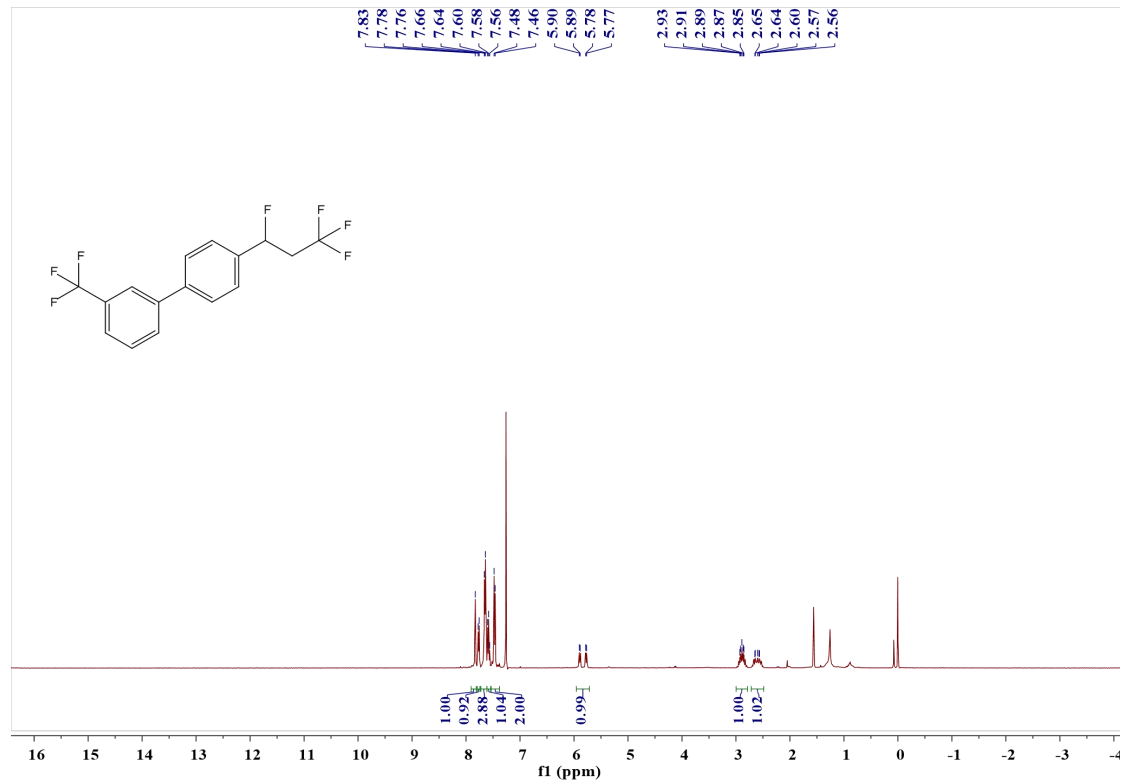

(<sup>13</sup>C NMR, CDCl<sub>3</sub>, 101 MHz)

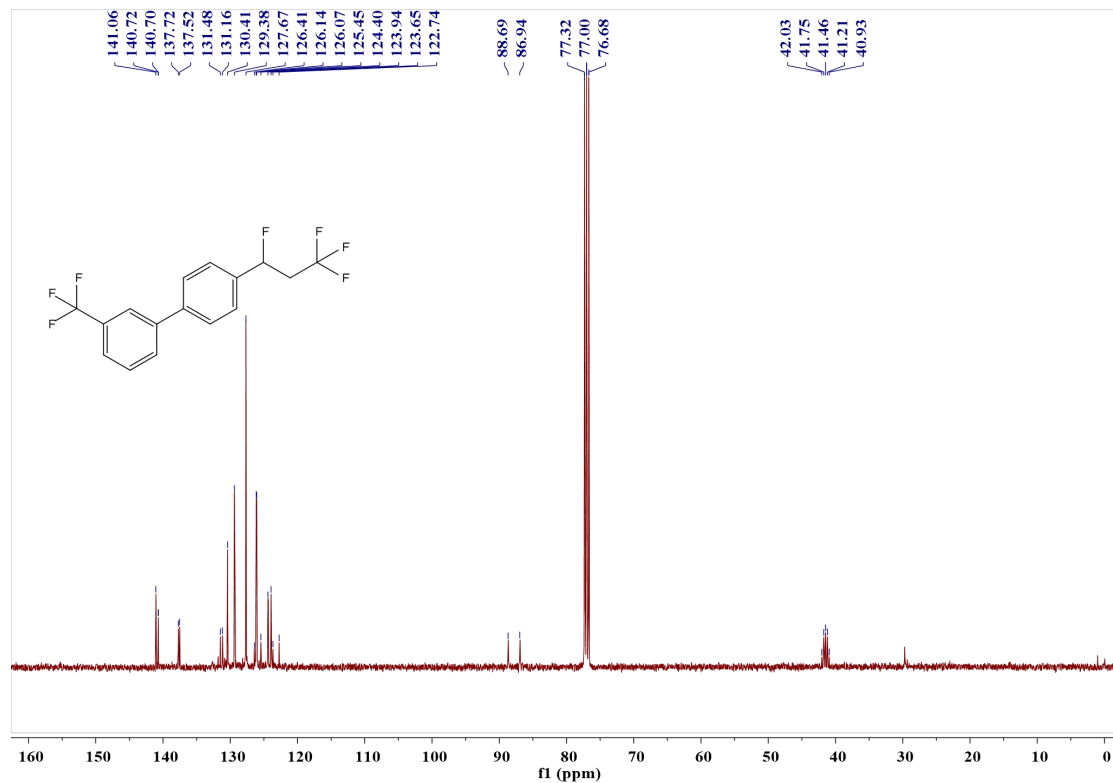

$^{19}\text{F}$  NMR,  $\text{CDCl}_3$ , 376 MHz

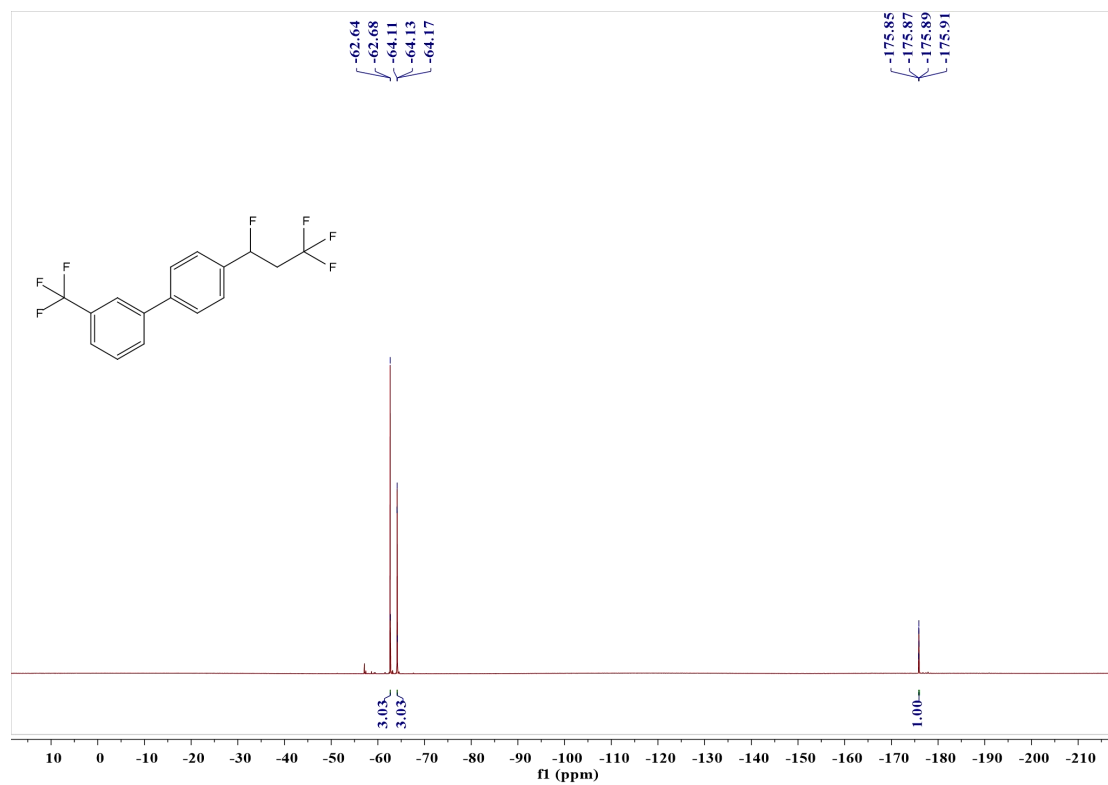

4-(1,3,3,3-Tetrafluoropropyl)-4'-(trifluoromethyl)-1,1'-biphenyl (2n)

$^1\text{H}$  NMR,  $\text{CDCl}_3$ , 400 MHz

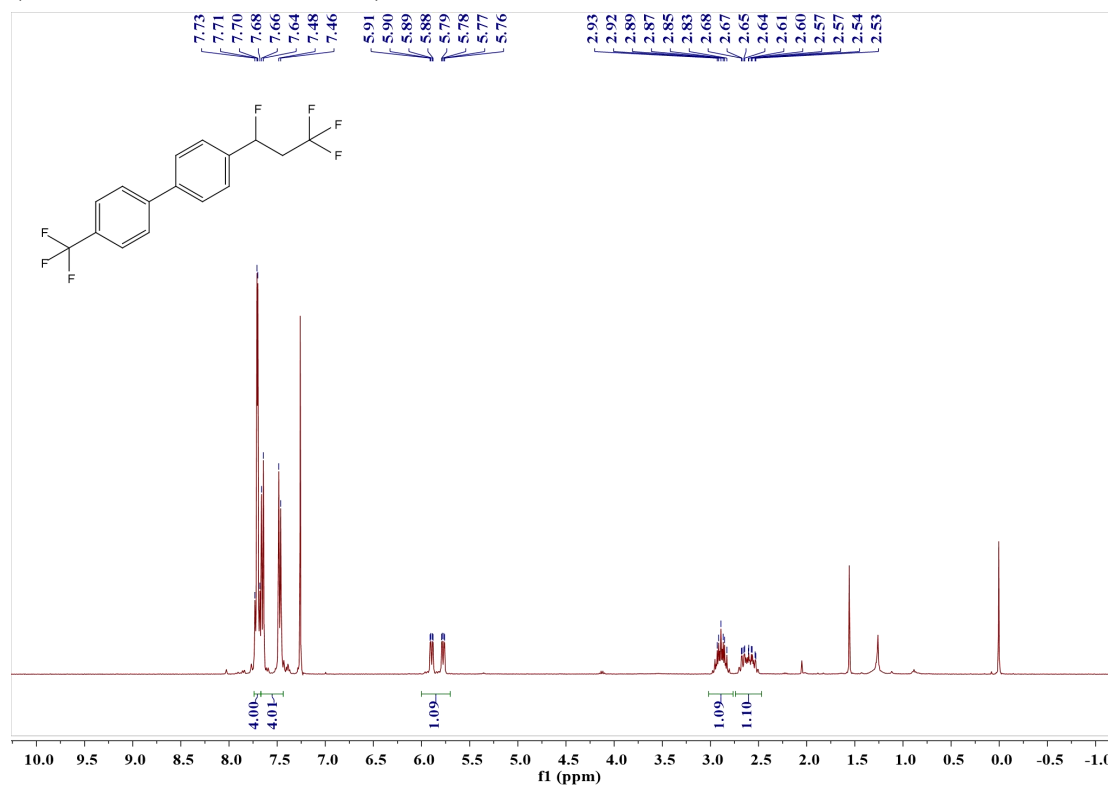

<sup>13</sup>C NMR, CDCl<sub>3</sub>, 101 MHz

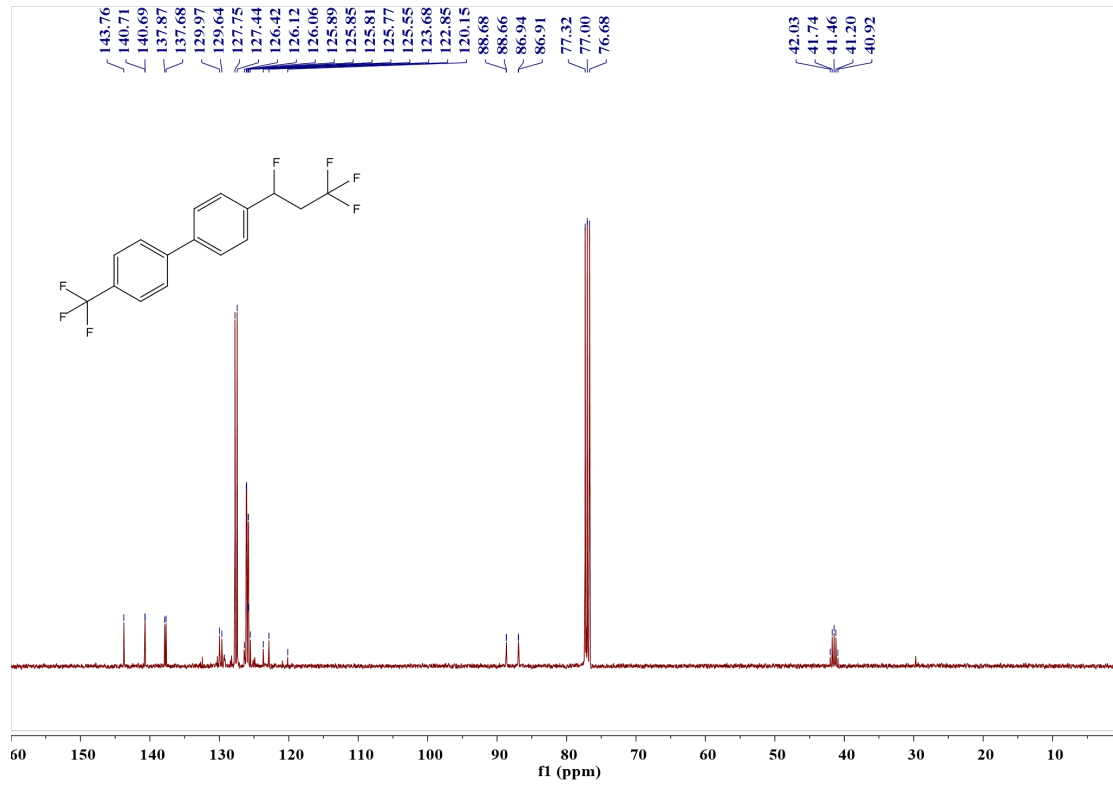

<sup>19</sup>F NMR, CDCl<sub>3</sub>, 376 MHz

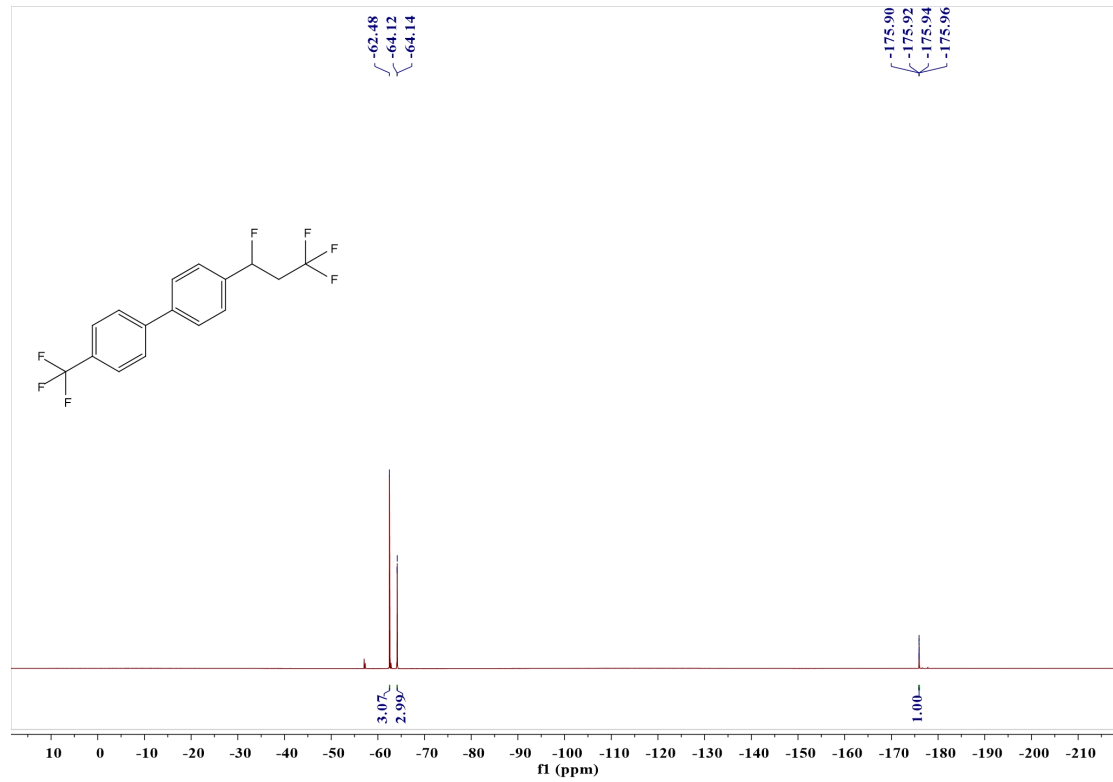

### 4-(1,3,3,3-Tetrafluoropropyl)-4'-(trifluoromethoxy)-1,1'-biphenyl (2o)

(<sup>1</sup>H NMR, CDCl<sub>3</sub>, 400 MHz)

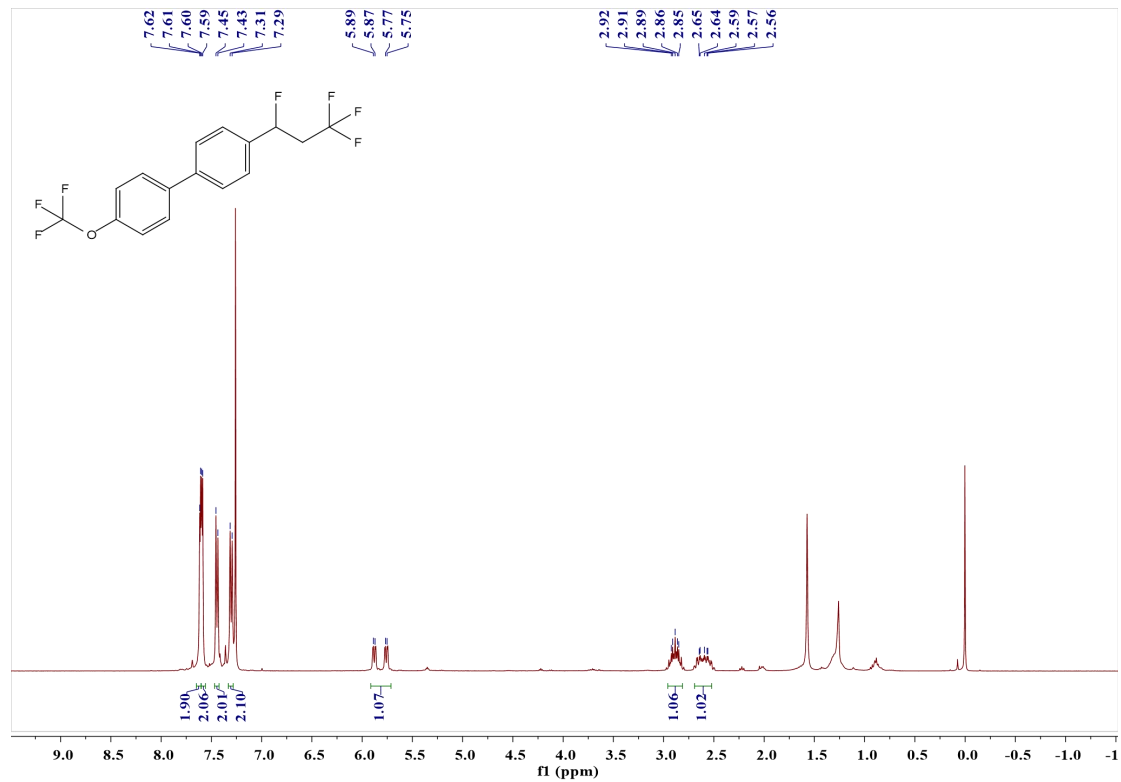

(<sup>13</sup>C NMR, CDCl<sub>3</sub>, 101 MHz)

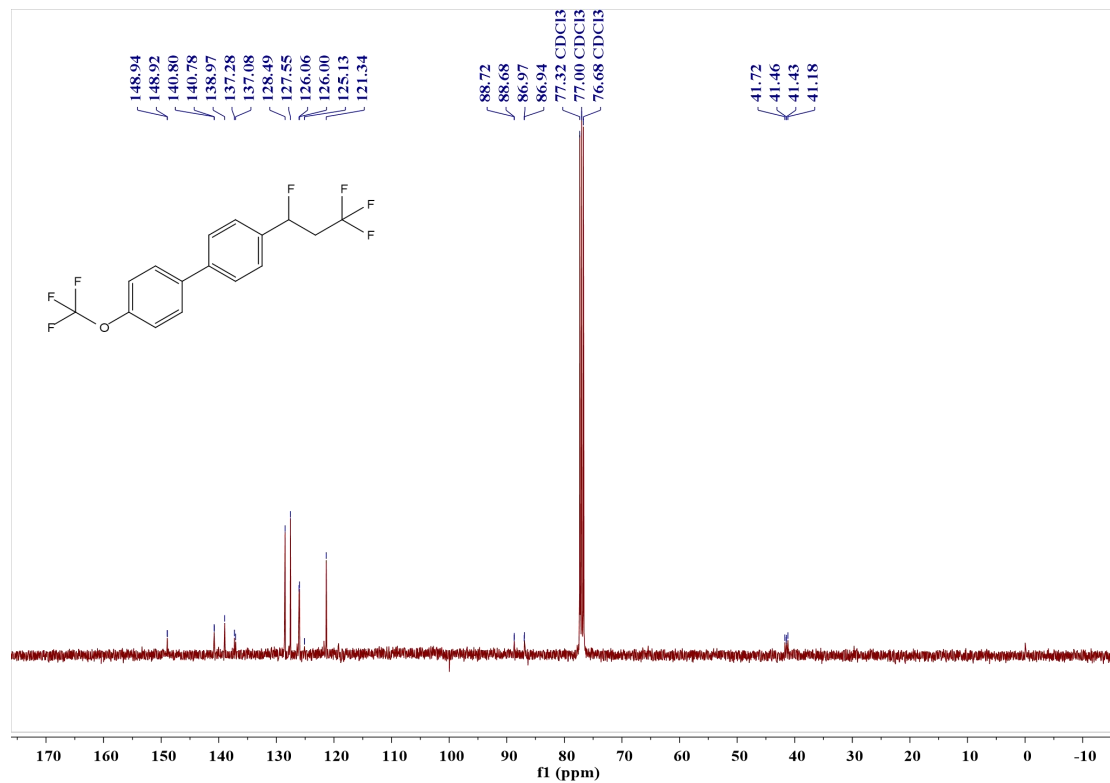

(<sup>19</sup>F NMR, CDCl<sub>3</sub>, 376 MHz)

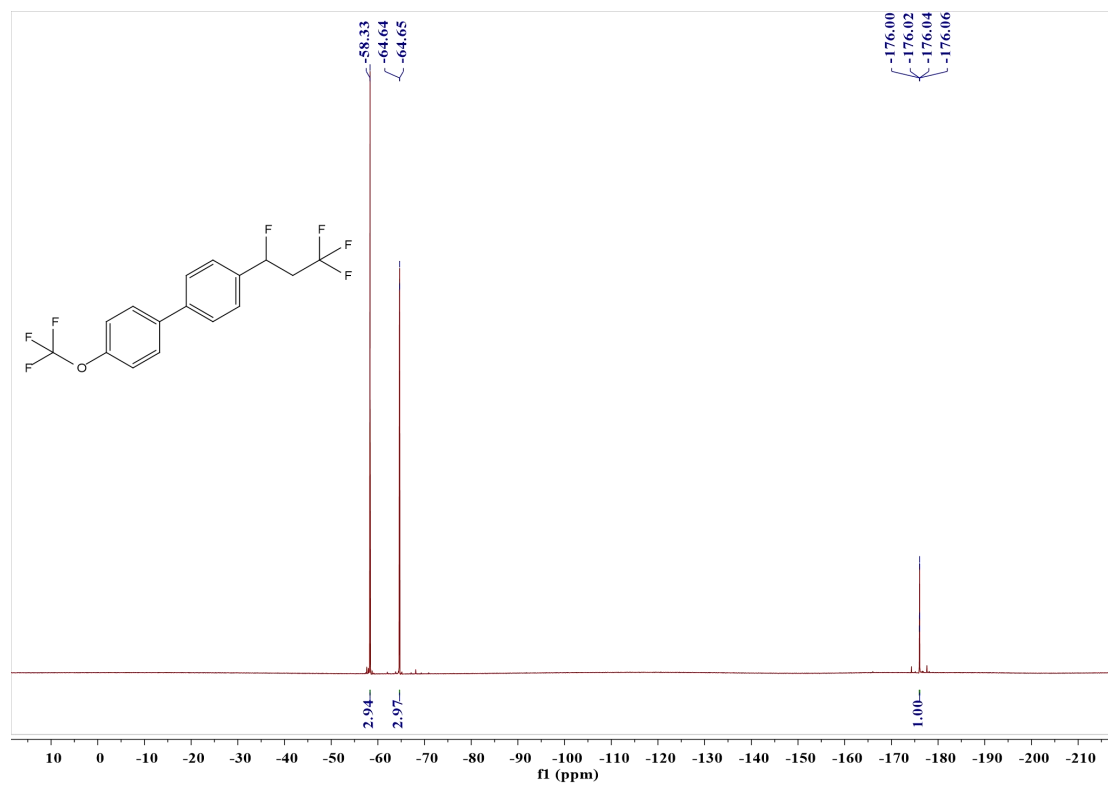

**2-Chloro-4'-(1,3,3,3-tetrafluoropropyl)-1,1'-biphenyl (2p)**

(<sup>1</sup>H NMR, CDCl<sub>3</sub>, 400 MHz)

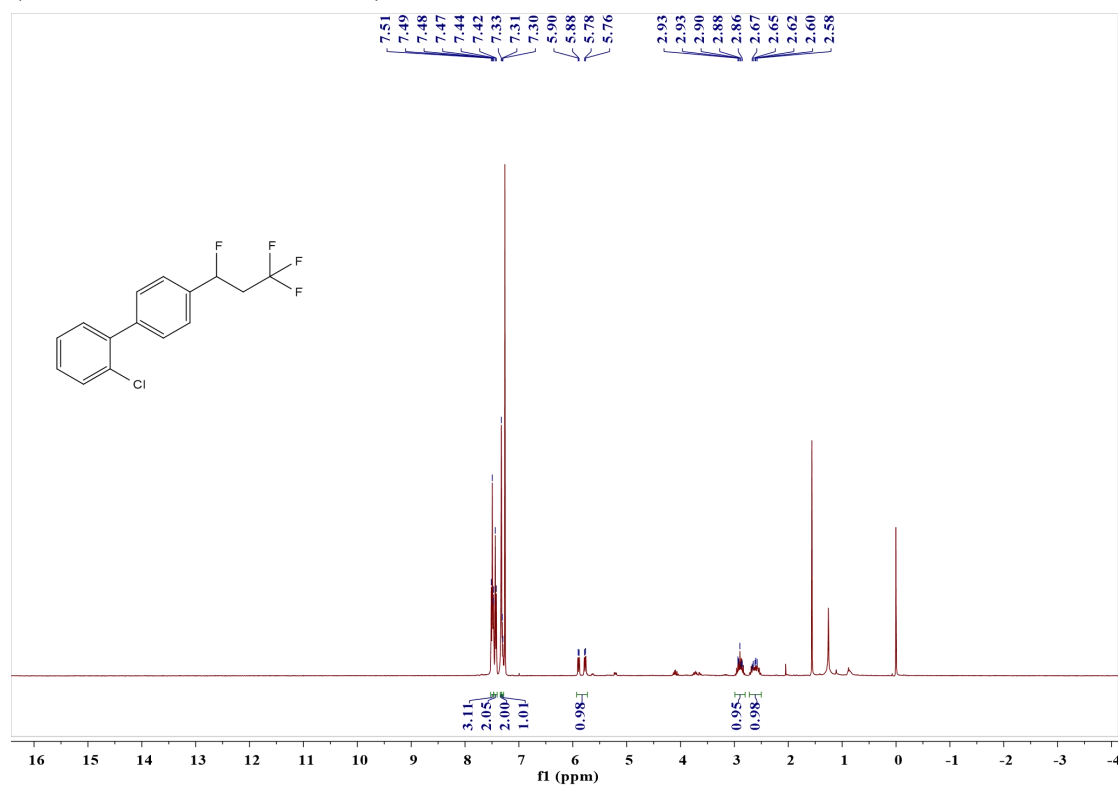

<sup>13</sup>C NMR, CDCl<sub>3</sub>, 101 MHz

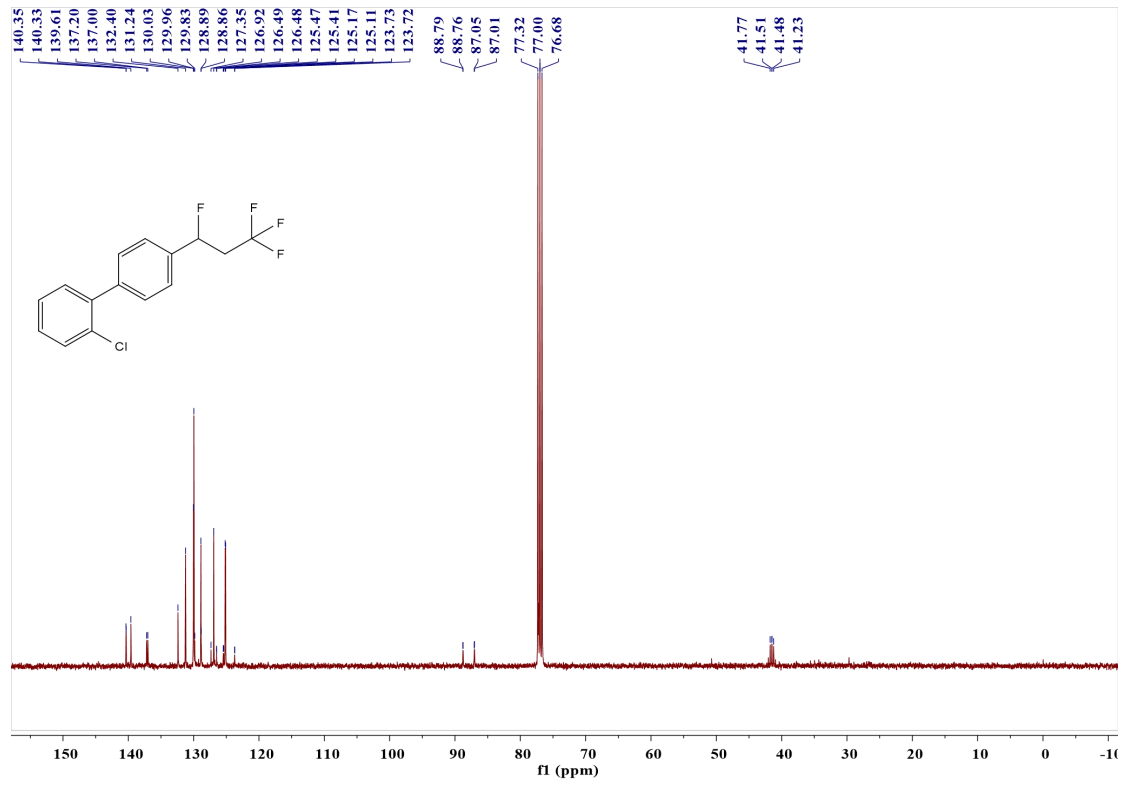

<sup>19</sup>F NMR, CDCl<sub>3</sub>, 376 MHz

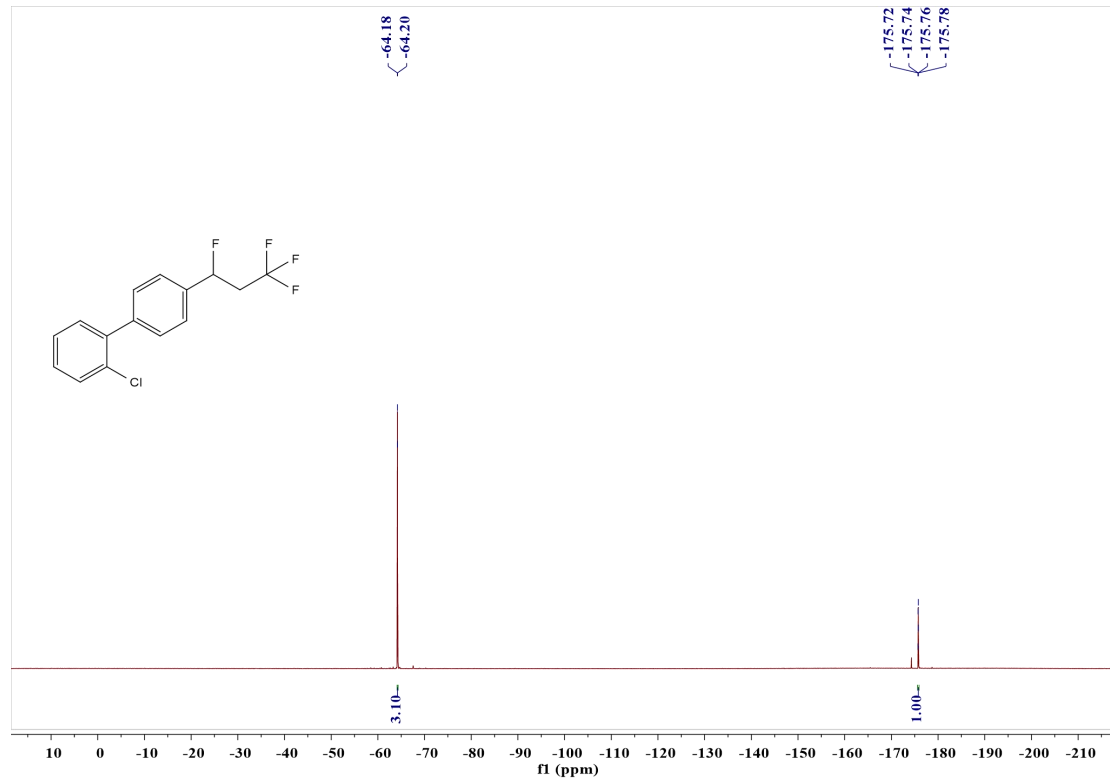

### 3-Chloro-4'-(1,3,3,3-tetrafluoropropyl)-1,1'-biphenyl (2q)

(<sup>1</sup>H NMR, CDCl<sub>3</sub>, 400 MHz)

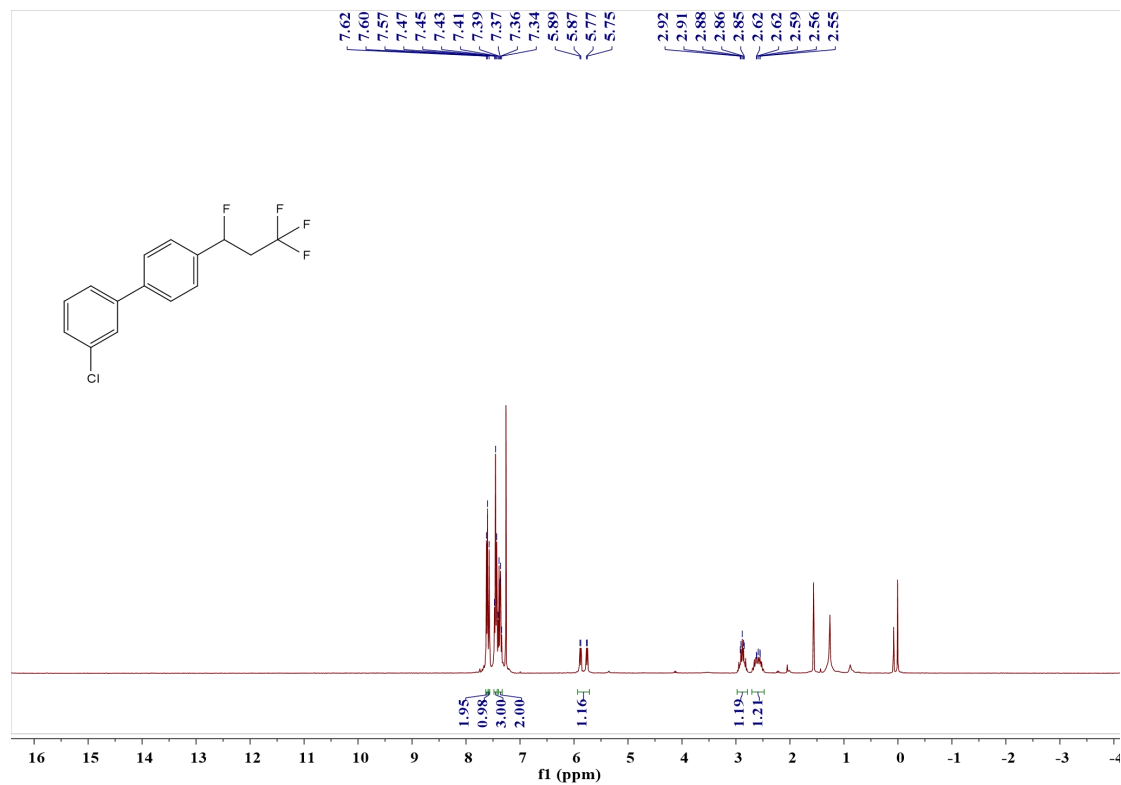

(<sup>13</sup>C NMR, CDCl<sub>3</sub>, 101 MHz)

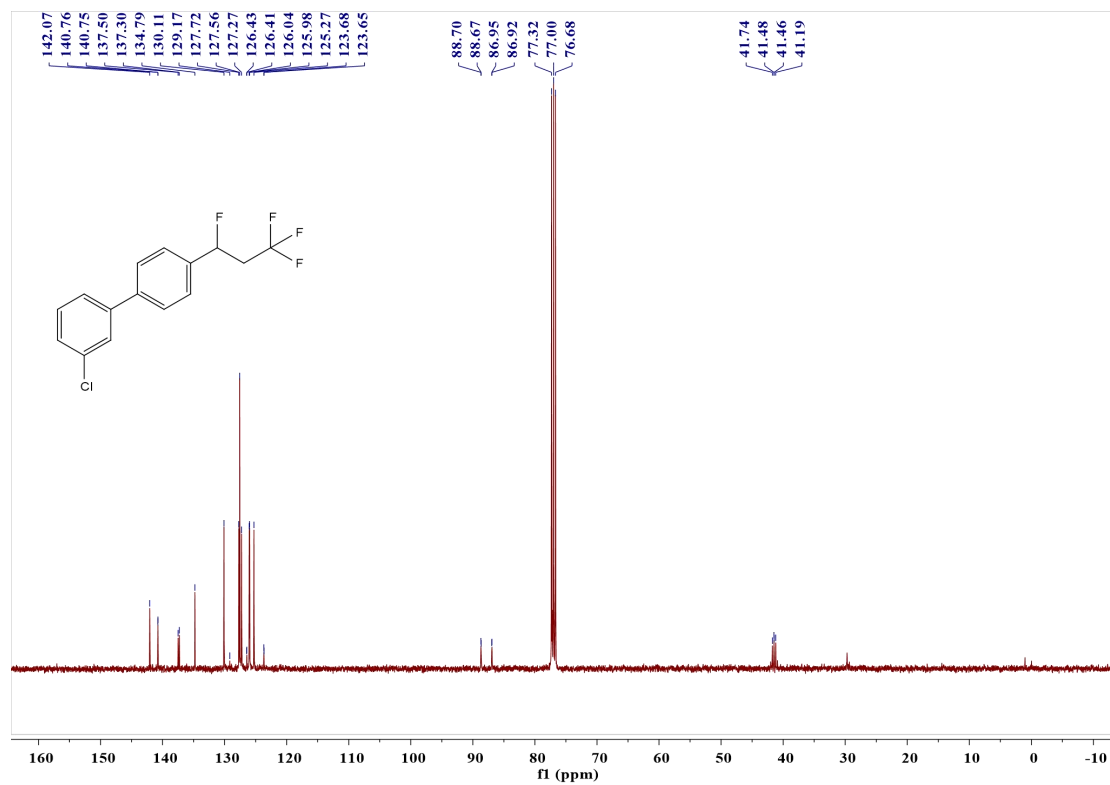



(<sup>19</sup>F NMR, CDCl<sub>3</sub>, 376 MHz)

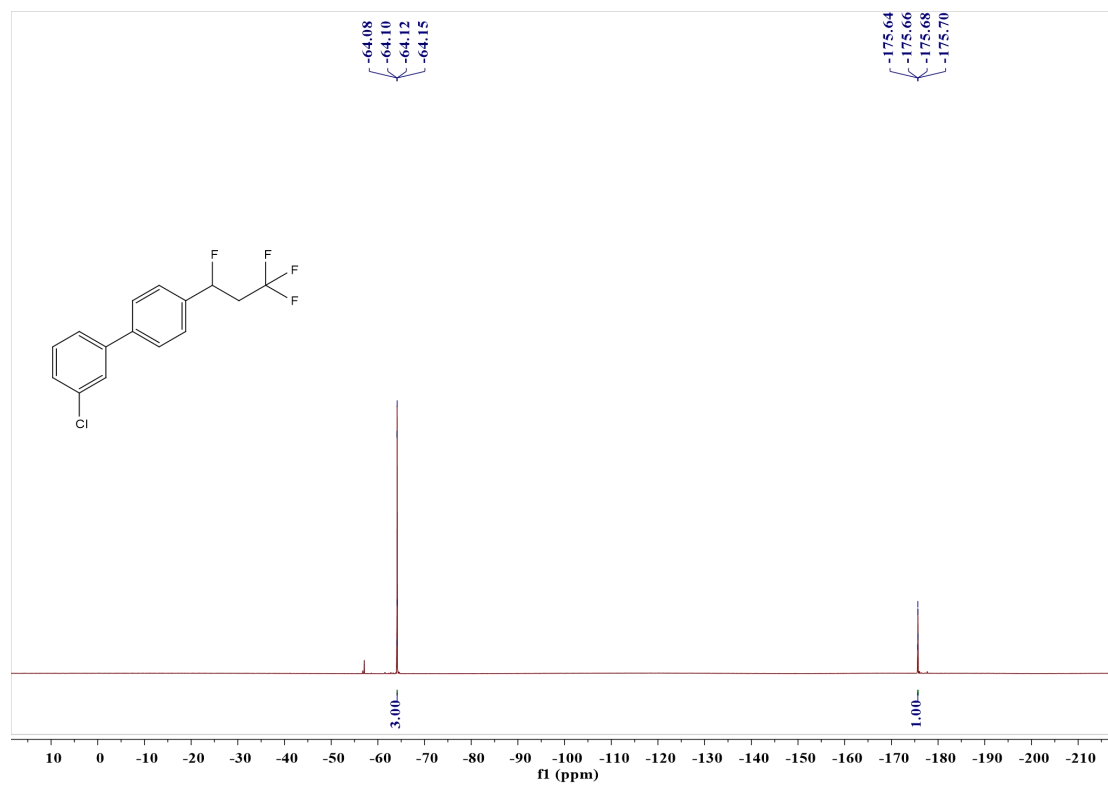

**4-Chloro-4'-(1,3,3,3-tetrafluoropropyl)-1,1'-biphenyl (2r)**

(<sup>1</sup>H NMR, CDCl<sub>3</sub>, 400 MHz)

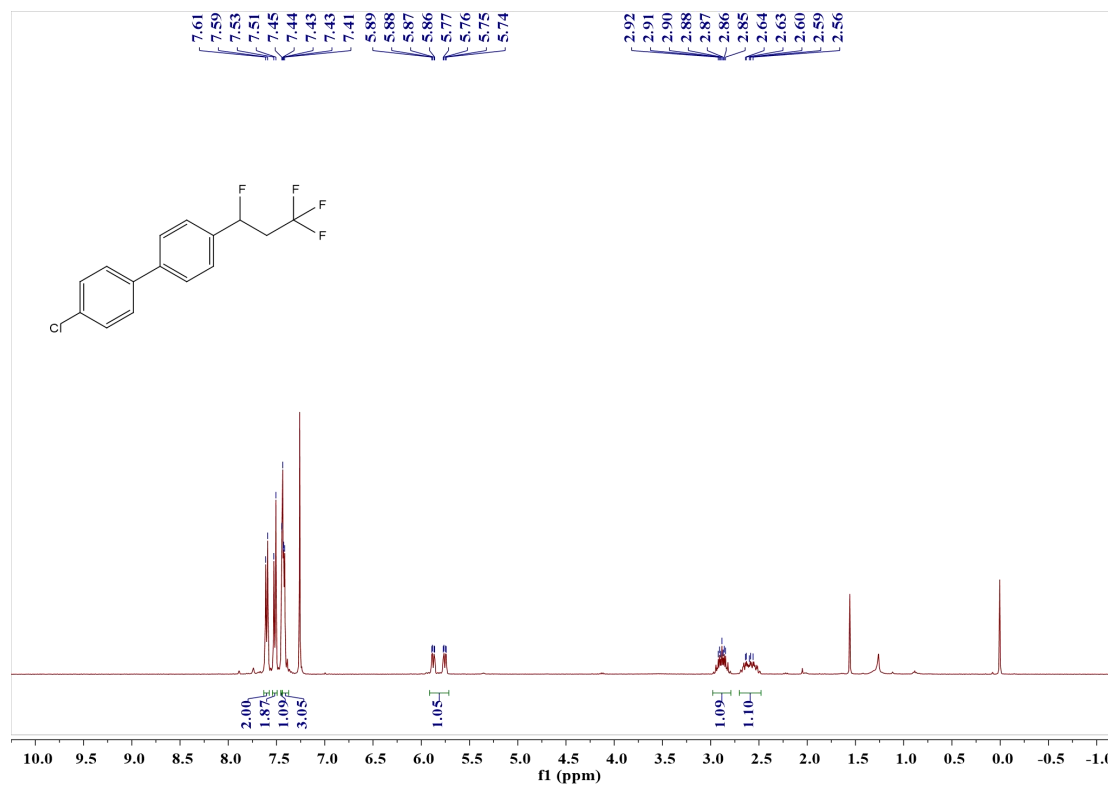

(<sup>13</sup>C NMR, CDCl<sub>3</sub>, 101 MHz)

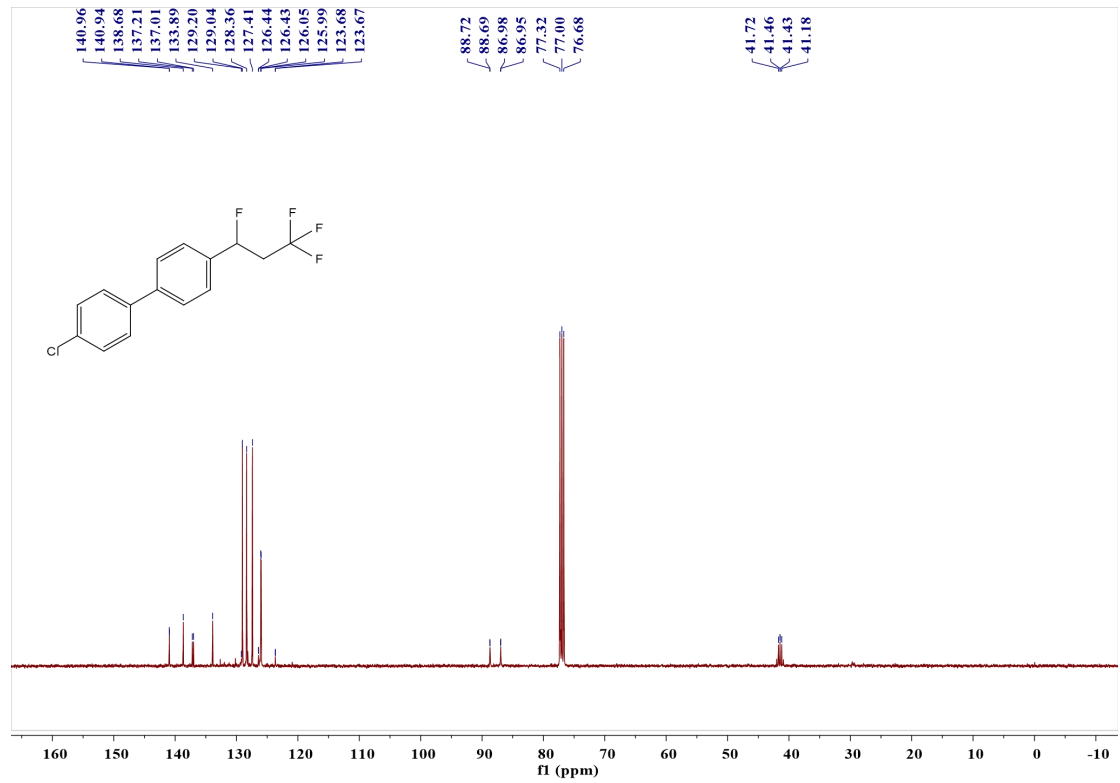

(<sup>19</sup>F NMR, CDCl<sub>3</sub>, 376 MHz)

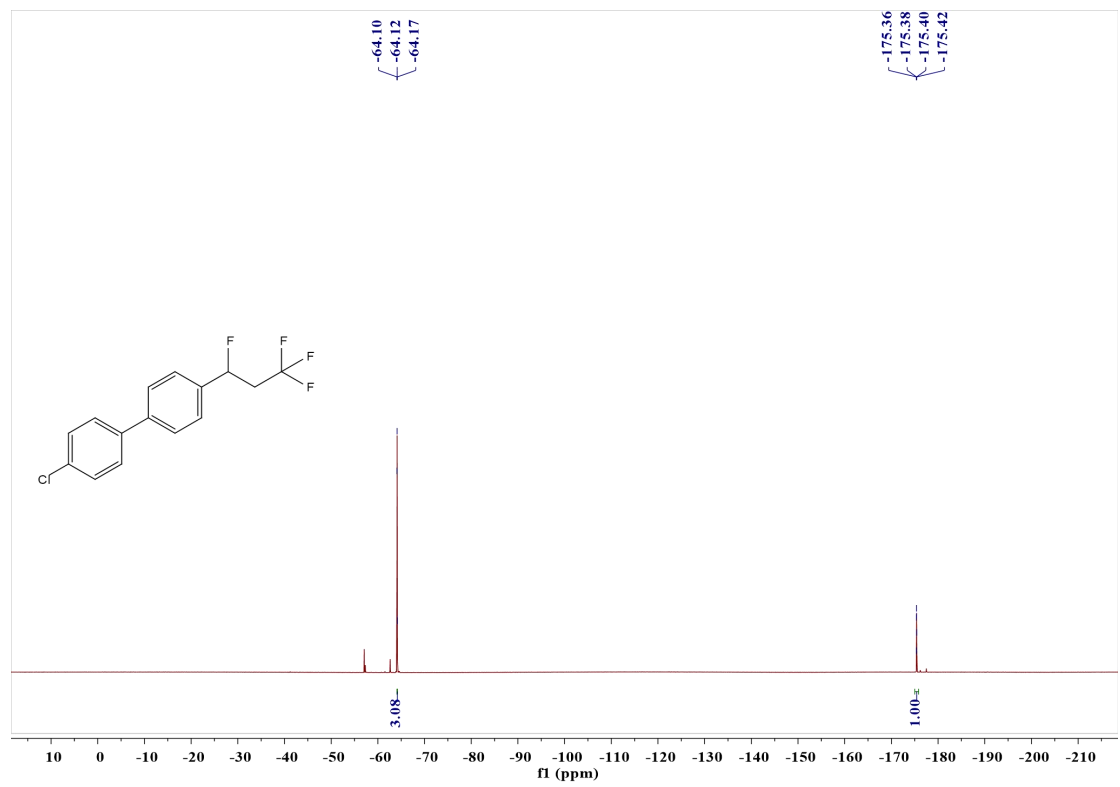

### 6-(4-(1,3,3,3-Tetrafluoropropyl)phenyl)-2,3-dihydrobenzo[b][1,4]dioxine (2s)

(<sup>1</sup>H NMR, CDCl<sub>3</sub>, 400 MHz)

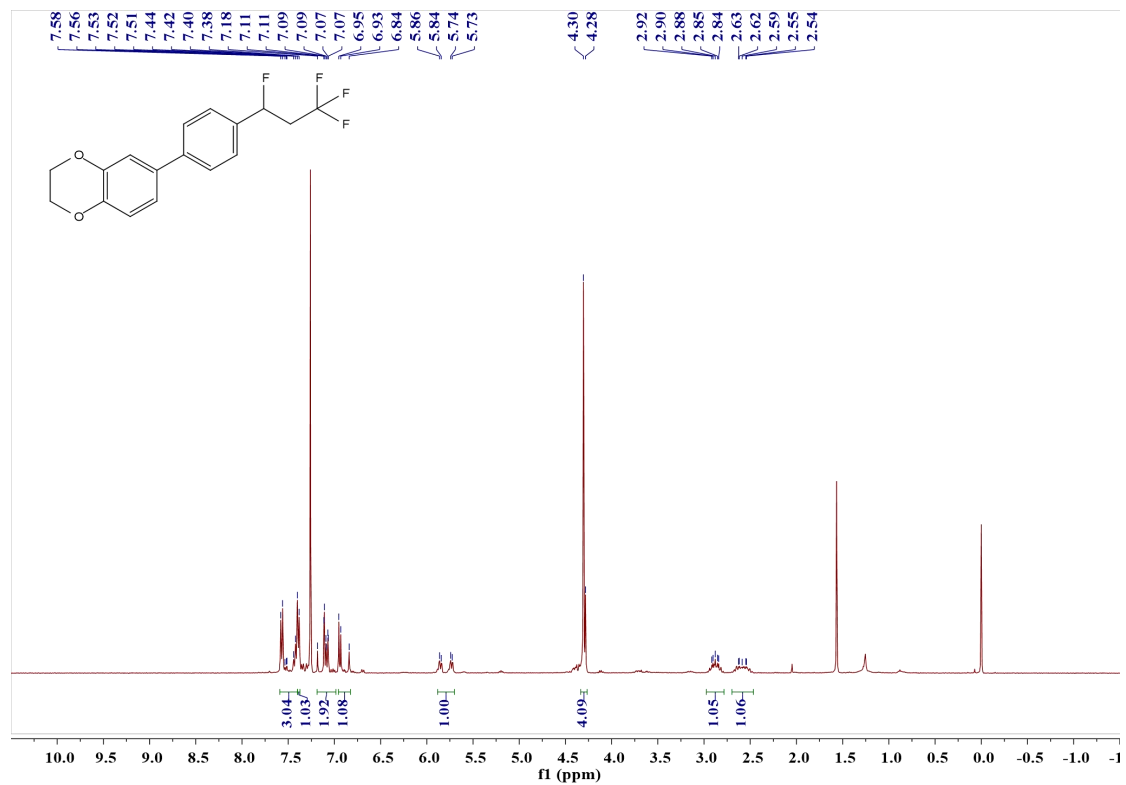

(<sup>13</sup>C NMR, CDCl<sub>3</sub>, 101 MHz)

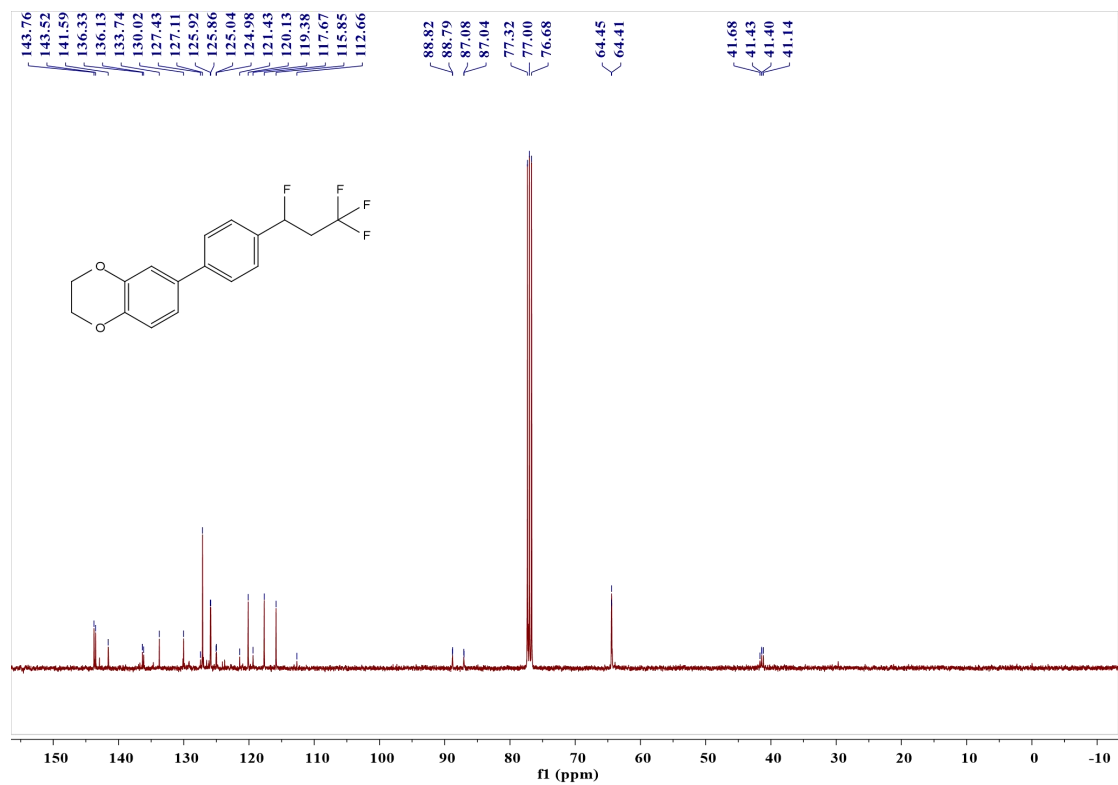

$^{19}\text{F}$  NMR,  $\text{CDCl}_3$ , 376 MHz

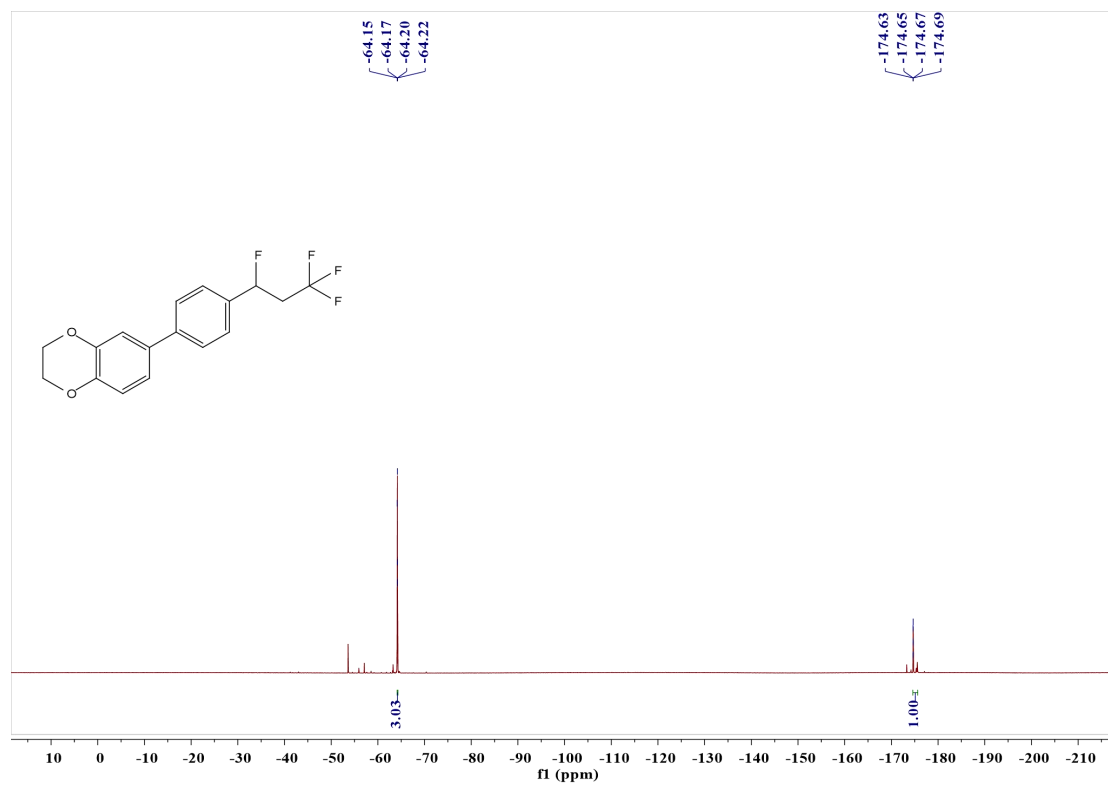

2-(4-(1,3,3,3-Tetrafluoropropyl)phenyl)naphthalene (2t)

$^1\text{H}$  NMR,  $\text{CDCl}_3$ , 400 MHz

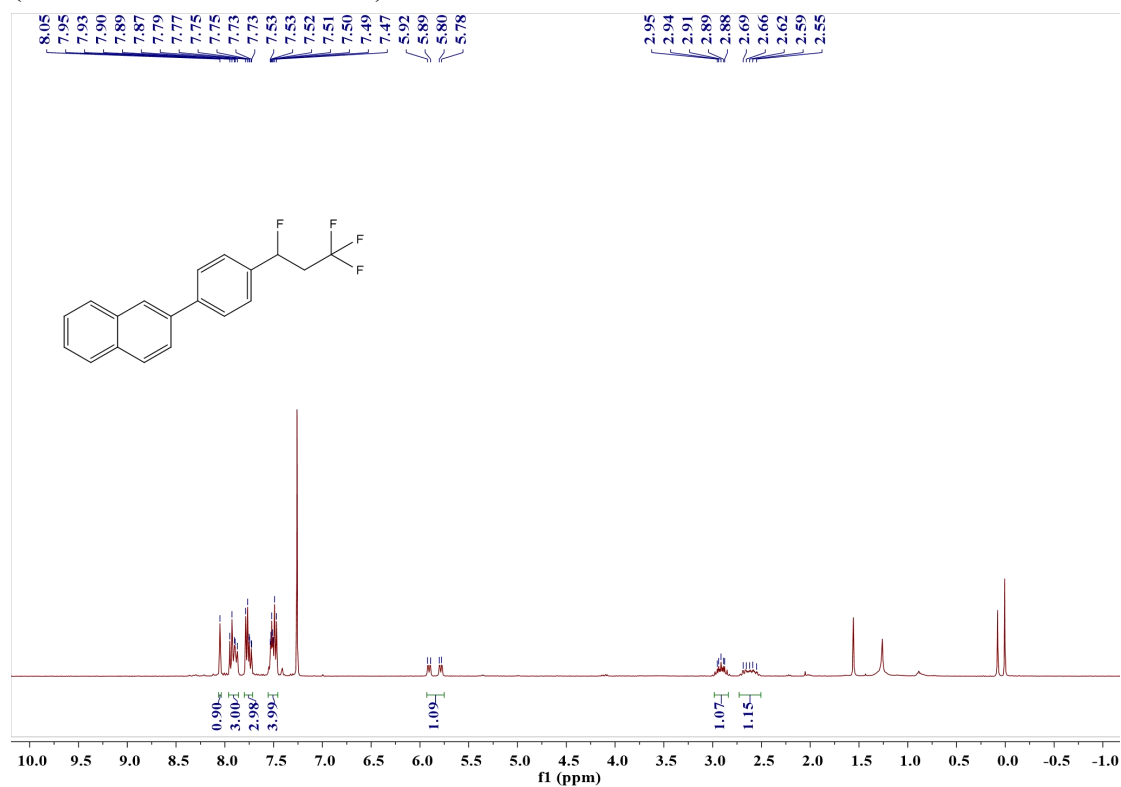

(<sup>13</sup>C NMR, CDCl<sub>3</sub>, 101 MHz)

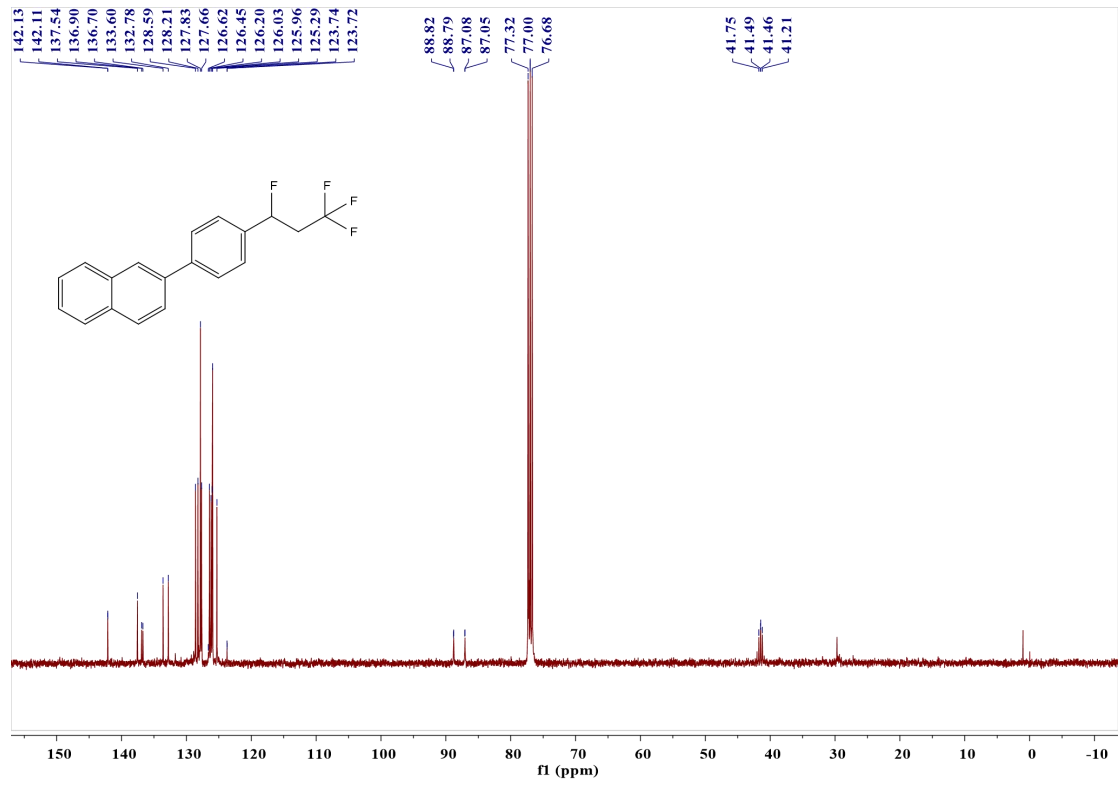

(<sup>19</sup>F NMR, CDCl<sub>3</sub>, 376 MHz)

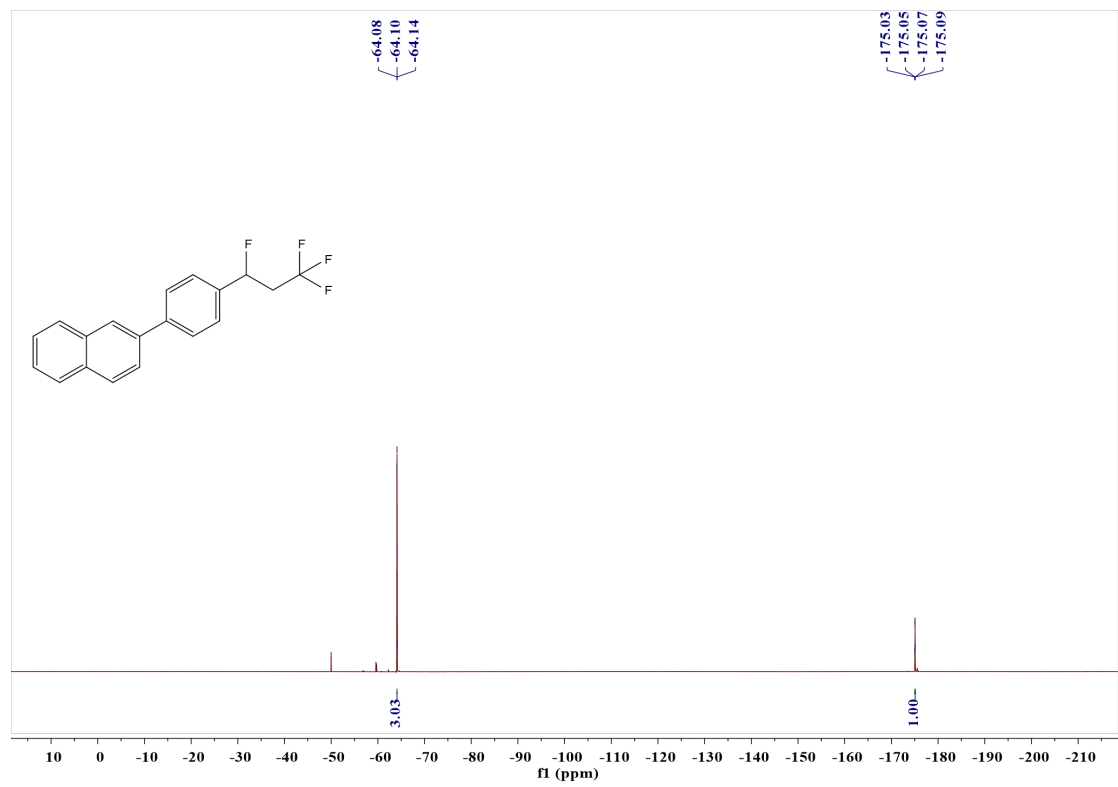

### 4-(4-(1,3,3,3-Tetrafluoropropyl)phenyl)pyridine (2u)

(<sup>1</sup>H NMR, CDCl<sub>3</sub>, 400 MHz)

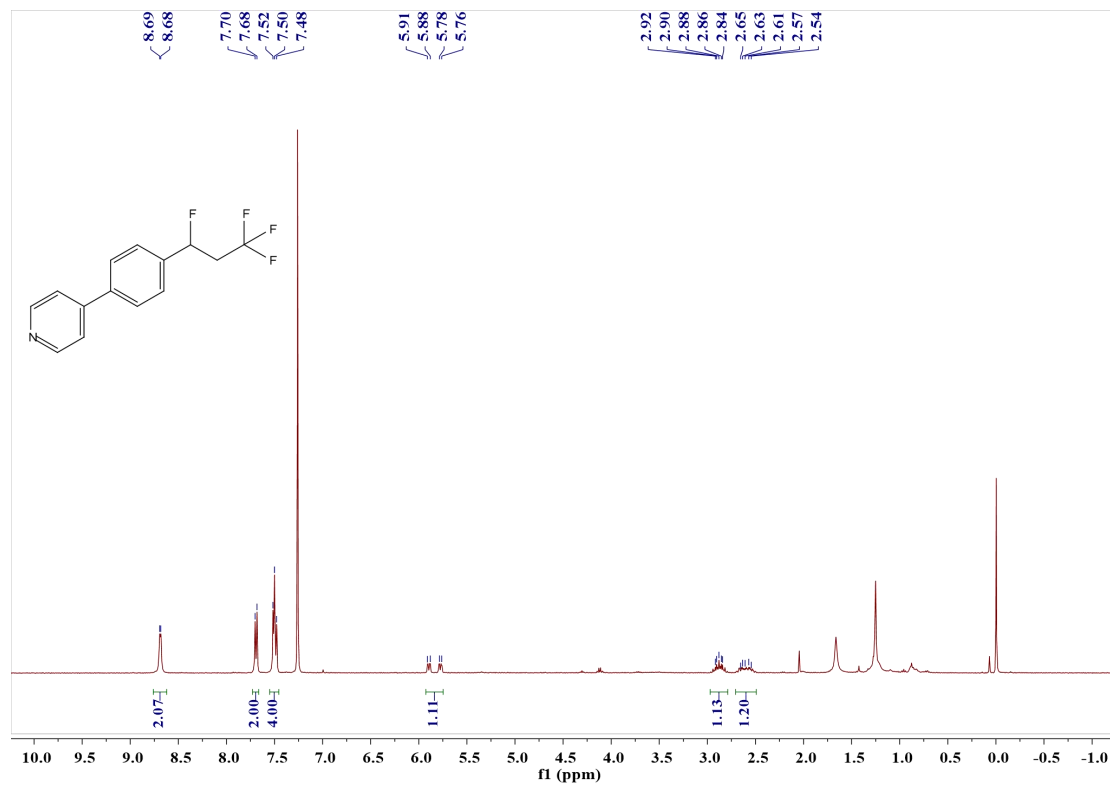

(<sup>13</sup>C NMR, CDCl<sub>3</sub>, 101 MHz)

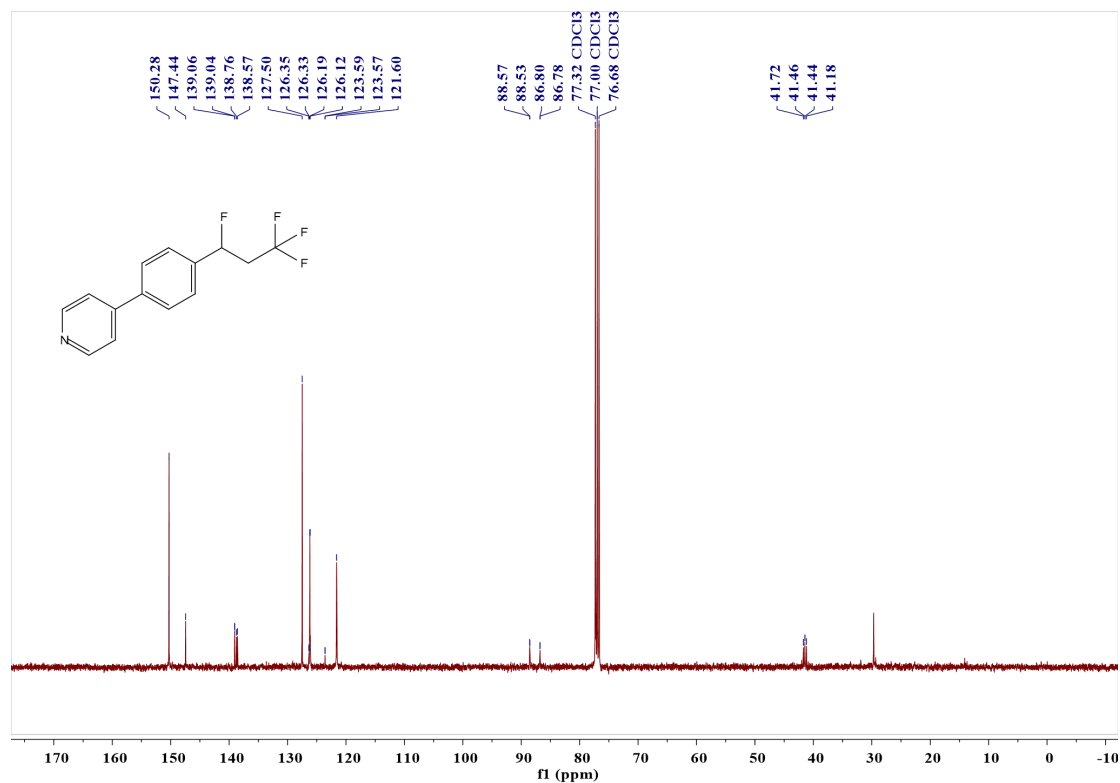

(<sup>19</sup>F NMR, CDCl<sub>3</sub>, 376 MHz)

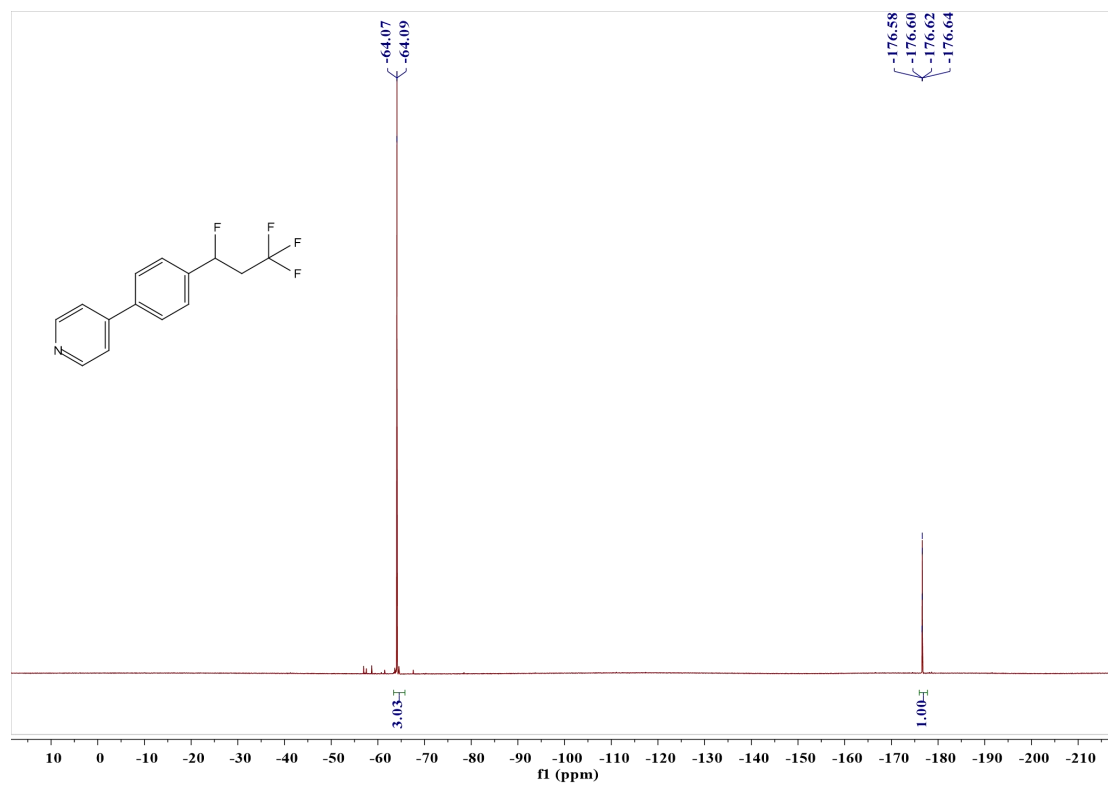

Supplement: d2qo01947g1.pdf [file d2qo01947g1.pdf]
